# Supplementary material for: Effectiveness of telehealth versus in-person care during the COVID-19 pandemic: a systematic review
Source: PubMed Central journal article supplement (PMC11180098; doi:10.1038/s41746-024-01152-2), 2024-06-15
Supplement: 41746_2024_1152_MOESM1_ESM.pdf [file 41746_2024_1152_MOESM1_ESM.pdf]

## Supplementary Information

**Supplementary Table 1A-C.** Search Strategy.

**Supplementary Table 2A-C.** Study, Participant, and Provider/ Health System Characteristics of Studies Investigating the Effectiveness of Telehealth vs. In-person Care During COVID-19.

**Supplementary Table 3.** Summary of Evidence for the Effects of Telehealth Versus In-person Care by Outcome Categories and Clinical Areas.

**Supplementary Table 4A-C.** Study Results Investigating the Effectiveness of Telehealth vs. In-person Care by Outcome Category and Clinical Area – Healthcare Utilization.

**Supplementary Table 5A-D.** Study Results Investigating the Effectiveness of Telehealth vs. In-person Care by Outcome Category and Clinical Area – Clinical Outcomes.

**Supplementary Table 6A-E.** Study Results Investigating the Effectiveness of Telehealth vs. In-person Care by Outcome Category and Clinical Area – Process Outcomes.

**Supplementary Table 7A-B.** Risk of Bias Assessment for Non-Randomized Studies and Randomized Clinical Trials.

**Supplementary Table 8.** Summary of Findings for Outcomes of Care Among Patients Receiving Telehealth Versus In-person Care During COVID-19.

**Supplementary Figure 1A-C.** The Difference in Health Outcomes for Patients with an Initial Telehealth versus In-person Visit by Outcome Category and Clinical Area.

**Supplementary Table 1-A. PubMed search strategy.**

| #  | String                                                                                  |
|----|-----------------------------------------------------------------------------------------|
| 1  | "Virtual health"[tiab]                                                                  |
| 2  | Telehealth[tiab]                                                                        |
| 3  | Telemedicine[mh]                                                                        |
| 4  | telemedicine[tiab]                                                                      |
| 5  | "mobile health"[tiab]                                                                   |
| 6  | mHealth[tiab]                                                                           |
| 7  | "m-health"[tiab]                                                                        |
| 8  | eHealth[tiab]                                                                           |
| 9  | "e-health"[tiab]                                                                        |
| 9  | "virtual care"[tiab]                                                                    |
| 10 | 1 OR 2OR 3 OR 4 OR 5 OR 6 OR 7 OR 8 OR 9 OR 9                                           |
| 11 | "clinical study"[pt]                                                                    |
| 12 | "clinical studies as topic"[mh]                                                         |
| 13 | "clinical study"[tiab]                                                                  |
| 14 | "observational study"[pt]                                                               |
| 15 | "observational studies as topic"[mh]                                                    |
| 16 | "observational study"[tiab]                                                             |
| 17 | "clinical trial"[pt]                                                                    |
| 18 | "clinical trials as topic"[mh]                                                          |
| 19 | "clinical trial"[tiab]                                                                  |
| 20 | "comparative study"[pt]                                                                 |
| 21 | "comparative study"[tiab]                                                               |
| 22 | "controlled clinical trial"[pt]                                                         |
| 23 | "controlled clinical trials as topic"[mh]                                               |
| 24 | "controlled clinical trial"[tiab]                                                       |
| 25 | "randomized controlled trial"[pt]                                                       |
| 26 | "randomized controlled trials as topic"[mh]                                             |
| 27 | "randomized controlled trial"[tiab] OR RCT[tiab] OR "randomised controlled trial"[tiab] |
| 28 | "cohort studies"[mh]                                                                    |
| 29 | "cohort study"[tiab]                                                                    |
| 30 | "retrospective studies"[mh]                                                             |
| 31 | "retrospective study"[tiab]                                                             |
| 32 | "cross-sectional studies"[mh]                                                           |
| 33 | "cross-sectional study"[tiab]                                                           |
| 34 | "qualitative research"[mh]                                                              |
| 35 | "evaluation study"[pt]                                                                  |
| 36 | "evaluation studies as topic"[mh]                                                       |
| 37 | "focus groups"[mh]                                                                      |
| 38 | interview[pt]                                                                           |
| 39 | "interviews as topic"[mh]                                                               |
| 40 | "qualitative"[tiab]                                                                     |
| 41 | "evaluation study"[tiab]                                                                |
| 42 | "focus group"[tiab]                                                                     |
| 43 | Interview[tiab]                                                                         |
| 44 | Interviews[tiab]                                                                        |

| #  | String                                                                                                                                                                                                   |
|----|----------------------------------------------------------------------------------------------------------------------------------------------------------------------------------------------------------|
| 45 | 11 OR 12 OR 13 OR 14 OR 15 OR 16 OR 17 OR 18 OR 19 OR 20 OR 21 OR 22 OR 23 OR 24 OR 25 OR 26 OR 27 OR 28 OR 29 OR 30 OR 31 OR 32 OR 33 OR 34 OR 35 OR 36 OR 37 OR 38 OR 39 OR 40 OR 41 OR 42 OR 43 OR 44 |
| 46 | Review[pt]                                                                                                                                                                                               |
| 47 | "systematic review"[pt]                                                                                                                                                                                  |
| 48 | "Meta-Analysis as Topic"[Mesh]                                                                                                                                                                           |
| 49 | 46 OR 47 OR 48                                                                                                                                                                                           |
| 50 | (10 AND 45) NOT 49                                                                                                                                                                                       |

### Supplementary Table 1-B. CINAHL and PsycINFO.

|     |                                                                                                                                                                                                                                                                                                                                                                                        |                                                 |
|-----|----------------------------------------------------------------------------------------------------------------------------------------------------------------------------------------------------------------------------------------------------------------------------------------------------------------------------------------------------------------------------------------|-------------------------------------------------|
| S15 | (S11 AND S12) NOT S13                                                                                                                                                                                                                                                                                                                                                                  | Limiters - Published Date:<br>20200301-20210731 |
| S14 | S11 AND S12                                                                                                                                                                                                                                                                                                                                                                            |                                                 |
| S13 | reviews OR "systematic review." OR metaanalysis" OR "meta analysis" OR "meta-analysis"                                                                                                                                                                                                                                                                                                 |                                                 |
| S12 | "clinical study" OR "observational study" OR "clinical trial" OR "comparative study" OR "controlled clinical Trial" OR "randomized controlled trial" OR "cohort study" OR "retrospective study" OR "cross-sectional study" OR "cross sectional study" OR "qualitative research" OR "evaluation study" OR "focus group" OR "focus groups" OR interview OR "randomised controlled trial" |                                                 |
| S11 | S1 OR S2 OR S3 OR S4 OR S5 OR S6 OR S7 OR S8 OR S9 OR S10                                                                                                                                                                                                                                                                                                                              |                                                 |
| S10 | (MM "Telehealth+")                                                                                                                                                                                                                                                                                                                                                                     |                                                 |
| S9  | MM "Telemedicine" OR MM "Online Therapy" OR MM "Teleconferencing" OR MM "Teleconsultation" OR MM "Telepsychiatry" OR MM "Telepsychology" OR MM "Telerehabilitation"                                                                                                                                                                                                                    |                                                 |
| S8  | TI "e-Health" OR AB "e-Health"                                                                                                                                                                                                                                                                                                                                                         |                                                 |
| S7  | TI eHealth OR AB eHealth                                                                                                                                                                                                                                                                                                                                                               |                                                 |
| S6  | TI "m-Health" OR AB "m-Health"                                                                                                                                                                                                                                                                                                                                                         |                                                 |
| S5  | TI mHealth OR AB mHealth                                                                                                                                                                                                                                                                                                                                                               |                                                 |
| S4  | TI "mobile health" OR AB "mobile health"                                                                                                                                                                                                                                                                                                                                               |                                                 |
| S3  | TI telemedicine OR AB telemedicine                                                                                                                                                                                                                                                                                                                                                     |                                                 |
| S2  | TI telehealth OR AB telehealth                                                                                                                                                                                                                                                                                                                                                         |                                                 |
| S1  | TI "Virtual health" OR AB "Virtual health"                                                                                                                                                                                                                                                                                                                                             |                                                 |

### Supplementary Table 1-C. Cochrane Central Register of Controlled Trials.

| ID | Search                                                           |
|----|------------------------------------------------------------------|
| #1 | ("virtual health"):ti,ab,kw (Word variations have been searched) |
| #2 | (telehealth):ti,ab,kw (Word variations have been searched)       |
| #3 | MeSH descriptor: [Telemedicine] explode all trees                |
| #4 | (telemedicine):ti,ab,kw (Word variations have been searched)     |
| #5 | ("mobile health"):ti,ab,kw                                       |
| #6 | ("m-health"):ti,ab,kw                                            |
| #7 | (mhealth):ti,ab,kw                                               |
| #8 | (ehealth):ti,ab,kw                                               |
| #9 | ("e-health"):ti,ab,kw                                            |

| ID                 | Search                                             |
|--------------------|----------------------------------------------------|
| #10                | #1 or #2 or #3 or #4 or #5 or #6 or #7 or #8 or #9 |
| * Date limited, no |                                                    |

**Supplementary Table 2-A. Characteristics of Studies Investigating the Effectiveness of Telehealth vs. In-person Care During COVID-19.**

| Author, year              | Intervention         | Study Design         | Study Period                          | Country        | Single or Multiple Sites | Geographic Location |
|---------------------------|----------------------|----------------------|---------------------------------------|----------------|--------------------------|---------------------|
| Adams, 2023(1)            | Not stated           | Retrospective cohort | General COVID era                     | United States  | Single Site              | Not reported        |
| Adepoju, 2022(2)          | Not stated           | Retrospective cohort | General COVID era                     | United States  | Single Site              | Not reported        |
| Afonso Nogueira, 2021(3)  | Telephone only       | Prospective Cohort   | Compares pre-COVID to COVID era       | Portugal       | Single Site              | Not reported        |
| Aiken, 2021(4)            | Telephone plus video | Cross-sectional      | Compares pre-COVID to COVID era       | United Kingdom | Multiple site            | Not reported        |
| Arias, 2022(5)            | Telephone plus video | Retrospective cohort | Compares pre-COVID to COVID era       | United States  | Single site              | Urban               |
| Barequet, 2021(6)         | Telephone plus video | Retrospective cohort | General COVID era                     | Israel         | Single site              | Urban               |
| Baughman, 2021(7)         | Not stated           | Retrospective cohort | Later COVID era (June 2020 and later) | United States  | Not reported             | Not reported        |
| Borgen, 2021(8)           | Telephone plus video | Prospective Cohort   | Early COVID era (March-June 2020)     | United States  | Multiple site            | Not reported        |
| Boshara, 2022(9)          | Not stated           | Cross-sectional      | General COVID era                     | United States  | Multiple site            | Urban               |
| Bryson, 2023(10)          | Not stated           | Longitudinal cohort  | General COVID era                     | United States  | Multiple site            | Urban               |
| Carlberg, 2020(11)        | Telephone plus video | Retrospective cohort | Early COVID era (March-June 2020)     | United States  | Multiple site            | Not reported        |
| Casariago-Vales, 2021(12) | Telephone plus video | Retrospective cohort | Later COVID era (June 2020 and later) | Spain          | Multiple site            | Not reported        |
| Chen, 2023(13)            | Telephone plus video | Cross-sectional      | General COVID era                     | United States  | Single site              | Urban               |
| Clark, 2022(14)           | Telephone plus video | Retrospective cohort | Compares pre-COVID to post-COVID      | Canada         | Single site              | Not reported        |
| Cobo-Calvo, 2022(15)      | Not stated           | Retrospective cohort | Compares pre-COVID to COVID era       | Spain          | Single site              | Urban               |
| Cunningham, 2022(16)      | Telephone plus video | Retrospective cohort | Compares pre-COVID to COVID era       | United States  | Multiple site            | Urban               |
| Cvietusa, 2022(17)        | Telephone plus video | Retrospective cohort | Compares pre-COVID to COVID era       | United States  | Not reported             | Not reported        |
| D'Anna, 2021(18)          | Telephone only       | Retrospective cohort | Compares pre-COVID to COVID era       | United Kingdom | Single site              | Urban               |
| Duryea, 2021(19)          | Telephone only       | Retrospective cohort | Compares pre-COVID to COVID era       | United States  | Single site              | Not reported        |
| Fortier, 2022(20)         | Telephone plus video | Prospective cohort   | Compares pre-COVID to COVID era       | United States  | Multiple site            | Urban               |
| Fredwall, 2021(21)        | Telephone plus video | Prospective cohort   | Early COVID era (March-June 2020)     | United States  | Single site              | Not reported        |
| Frost, 2022(22)           | Telephone plus video | Cross-sectional      | General COVID era                     | United States  | Not reported             | Not reported        |
| Gaetani, 2021(23)         | Telephone plus video | Prospective Cohort   | Compares pre-COVID to COVID era       | Italy          | Single site              | Not reported        |
| Gainer, 2023(24)          | Telephone plus video | Retrospective cohort | Later COVID era (June 2020 and later) | United States  | Single site              | Not reported        |

| Author, year         | Intervention         | Study Design              | Study Period                          | Country        | Single or Multiple Sites | Geographic Location   |
|----------------------|----------------------|---------------------------|---------------------------------------|----------------|--------------------------|-----------------------|
| Gao, 2022(25)        | Not stated           | Cross-sectional           | Early COVID era (March-June 2020)     | United States  | Single site              | Urban Suburban, Rural |
| Garmendia, 2021(26)  | Telephone plus video | Prospective cohort        | Compares pre-COVID to COVID era       | Spain          | Multiple site            | Not reported          |
| Griebeler, 2022(27)  | Not stated           | Randomized Clinical Trial | Later COVID era (June 2020 and later) | United States  | Single site              | Not reported          |
| Hatef, 2022(28)      | Telephone plus video | Prospective cohort        | Compares pre-COVID to COVID era       | United States  | Claims data              | Urban and rural       |
| Hughes, 2022(29)     | Not stated           | Retrospective cohort      | Early COVID era (March-June 2020)     | United States  | Single site              | Not reported          |
| Jazayeri, 2022(30)   | Telephone plus video | Prospective cohort        | General COVID era                     | United States  | Single site              | Not reported          |
| Kablinger, 2022(31)  | Telephone plus video | Retrospective cohort      | Compares pre-COVID to COVID era       | United States  | Single site              | Not reported          |
| Kerestes, 2021(32)   | Telephone plus video | Retrospective cohort      | General COVID era                     | United States  | Single site              | Not reported          |
| Khosla, 2022(33)     | Telephone only       | Retrospective cohort      | Compares pre-COVID to COVID era       | United States  | Single site              | Urban                 |
| Klain, 2021(34)      | Telephone only       | Retrospective cohort      | Compares pre-COVID to COVID era       | Italy          | Single site              | Urban                 |
| Kolb, 2021(35)       | Telephone plus video | Retrospective cohort      | Early COVID era (March-June 2020)     | United States  | Single site              | Not reported          |
| Korycinski, 2022(36) | Telephone only       | Retrospective cohort      | Early COVID era (March-June 2020)     | United States  | Single site              | Not reported          |
| Levinson, 2021(37)   | Telephone plus video | Retrospective cohort      | Compares pre-COVID to COVID era       | United States  | Not reported             | Not reported          |
| Li, 2021(38)         | Telephone plus video | Retrospective cohort      | Early COVID era (March-June 2020)     | United Kingdom | Single site              | Not reported          |
| Lindhagen, 2022(39)  | Not stated           | Retrospective cohort      | Compares pre-COVID to COVID era       | Sweden         | Single site              | Urban                 |
| Liou, 2022(40)       | Not stated           | Retrospective cohort      | Compares pre-COVID to COVID era       | United States  | Single site              | Not reported          |
| Liu, 2021(41)        | Not stated           | Prospective Cohort        | Early COVID era (March-June 2020)     | Australia      | Single site              | Urban                 |
| Mair, 2021(42)       | Not stated           | Retrospective cohort      | Compares pre-COVID to COVID era       | New Zealand    | Single site              | Urban                 |
| Mathews, 2022(43)    | Not stated           | Retrospective cohort      | Compares pre-COVID to COVID era       | United States  | Single site              | Not reported          |
| McCoy, 2022(44)      | Not stated           | Cross-sectional           | Compares pre-COVID to COVID era       | United States  | Single site              | Urban                 |
| McNamara, 2021(45)   | Not stated           | Retrospective cohort      | Compares pre-COVID to COVID era       | United States  | Multiple site            | Urban                 |
| Metcalfe, 2023(46)   | Telephone only       | Retrospective cohort      | Later COVID era (June 2020 and later) | United Kingdom | Single                   | Not reported          |
| Minsky, 2021(47)     | Telephone plus video | Prospective cohort        | Compares pre-COVID to COVID era       | Israel         | Single site              | Not reported          |
| Mossack, 2022(48)    | Not stated           | Randomized Clinical Trial | Later COVID era (June 2020 and later) | United States  | Single site              | Not reported          |

| Author, year       | Intervention         | Study Design              | Study Period                          | Country        | Single or Multiple Sites | Geographic Location |
|--------------------|----------------------|---------------------------|---------------------------------------|----------------|--------------------------|---------------------|
| Offiah, 2022(49)   | Telephone plus video | Retrospective cohort      | Compares pre-COVID to COVID era       | Ireland        | Multiple site            | Not reported        |
| Ostberg, 2022(50)  | Telephone plus video | Cross-sectional           | General COVID era                     | United States  | Multiple site            | Suburban            |
| Parise, 2021(51)   | Telephone plus video | Prospective cohort        | Early COVID era (March-June 2020)     | Italy          | Multiple site            | Not reported        |
| Phillips, 2021(52) | Not stated           | Retrospective cohort      | Early COVID era (March-June 2020)     | United States  | Single site              | Not reported        |
| Piga, 2022(53)     | Telephone plus video | Prospective cohort        | Early COVID era (March-June 2020)     | Italy          | Single site              | Not reported        |
| Pinsker, 2021(54)  | Telephone plus video | Retrospective cohort      | Early COVID era (March-June 2020)     | United States  | Single site              | Not reported        |
| Prato, 2022(55)    | Telephone plus video | Randomized Clinical Trial | Later COVID era (June 2020 and later) | Italy          | Single site              | Not reported        |
| Reddy, 2021(56)    | Telephone plus video | Retrospective cohort      | Early COVID era (March-June 2020)     | United States  | Single site              | Not reported        |
| Rene, 2022(57)     | Not stated           | Retrospective cohort      | Early COVID era (March-June 2020)     | United States  | Single site              | Not reported        |
| Ripp, 2022(58)     | Not stated           | Retrospective cohort      | Compares pre-COVID to COVID era       | United States  | Single site              | Not reported        |
| Rowe, 2021(59)     | Telephone plus video | Retrospective cohort      | General COVID era                     | Australia      | Single site              | Not reported        |
| Ryskina, 2021(60)  | Telephone plus video | Retrospective cohort      | Early COVID era (March-June 2020)     | United States  | Multiple site            | Urban and Suburban  |
| Severino, 2022(61) | Telephone only       | Prospective cohort        | General COVID era                     | Italy          | Single site              | Not reported        |
| Sevilis, 2022(62)  | Telephone plus video | Retrospective cohort      | Compares pre-COVID to COVID era       | United States  | Multiple site            | Not reported        |
| Shah, 2022(63)     | Not stated           | Retrospective cohort      | General COVID era                     | United States  | Single site              | Urban               |
| Sharma, 2020(64)   | Telephone only       | Retrospective cohort      | Compares pre-COVID to COVID era       | United Kingdom | Not reported             | Not reported        |
| Sohail, 2023(65)   | Telephone plus video | Retrospective cohort      | General COVID era                     | United States  | Single site              | Not reported        |
| Sun, 2022(66)      | Not stated           | Retrospective cohort      | General COVID era                     | United States  | Single site              | Urban               |
| Szigety, 2022(67)  | Not stated           | Retrospective cohort      | Compares pre-COVID to COVID era       | United States  | Single site              | Not reported        |
| Tarn, 2021(68)     | Telephone plus video | Cross-sectional           | Early COVID era (March-June 2020)     | United States  | Single site              | Not reported        |
| Tchang, 2022(69)   | Telephone plus video | Retrospective cohort      | Compares pre-COVID to COVID era       | United States  | Single site              | Urban               |
| Wabe, 2022(70)     | Telephone plus video | Retrospective cohort      | General COVID era                     | Australia      | Multiple site            | Urban, rural        |
| Walker, 2023(71)   | Not stated           | Retrospective cohort      | General COVID era                     | United States  | Single site              | Not reported        |
| Watson, 2021(72)   | Telephone only       | Cross-sectional           | Compares pre-COVID to COVID era       | Australia      | Single site              | Not reported        |
| Ye, 2022(73)       | Telephone plus video | Retrospective cohort      | General COVID era                     | United States  | Single site              | Urban               |

| Author, year        | Intervention         | Study Design         | Study Period                      | Country       | Single or Multiple Sites | Geographic Location |
|---------------------|----------------------|----------------------|-----------------------------------|---------------|--------------------------|---------------------|
| Zayde, 2021(74)     | Telephone plus video | Prospective cohort   | Compares pre-COVID to COVID era   | United States | Single site              | Urban               |
| Zhao, 2021(75)      | Telephone plus video | Retrospective cohort | Compares pre-COVID to COVID era   | United States | Single site              | Not reported        |
| Zhu, 2021(76)       | Not stated           | Retrospective cohort | Early COVID era (March-June 2020) | Australia     | Multiple site            | Urban               |
| Zimmerman, 2021(77) | Telephone plus video | Prospective cohort   | General COVID era                 | United States | Single site              | Not reported        |

**Supplementary Table 2-B. Participant Characteristics of Studies Investigating the Effectiveness of Telehealth vs. In-person Care During COVID-19.**

| Author, Year             | Comparison Groups                     |             |                                                                                         | N Patients | Patient Health Concern/Clinical Condition | Target Population                          | Age           | Sex, n (%)            |
|--------------------------|---------------------------------------|-------------|-----------------------------------------------------------------------------------------|------------|-------------------------------------------|--------------------------------------------|---------------|-----------------------|
|                          | Study Period                          | Arm/ Group* | Arm Label*                                                                              |            |                                           |                                            |               |                       |
| Adams, 2023(1)           | General COVID era                     | Full group  | Overall                                                                                 | NR         | Federally Qualified Health Centers        | Socially/racially disadvantaged (all ages) | Mean: 27.1    | Female: 51,906 (60.8) |
| Adepoju, 2022(2)         | General COVID era                     | Full group  | Overall                                                                                 | 278,171    | Federally Qualified Health Centers        | Socially/racially disadvantaged (all ages) | Mean: 27.1    | Female: 51,906 (60.8) |
| Afonso Nogueira, 2021(3) | Compares pre-COVID to COVID era       | Arm 1       | Individuals with heart failure attending outpatient cardiology appointments (Pre-COVID) | 160        | Cardiology                                | NR                                         | Mean: NR      | NR                    |
|                          |                                       | Full group  | Individuals with heart failure attending outpatient cardiology appointments             | 196        | Cardiology                                | NR                                         | Mean: 71.4    | Male: (68)            |
| Aiken, 2021(4)           | Compares pre-COVID to COVID era       | Arm 1       | Individuals receiving medical abortion following in-person visit                        | 22,158     | Pregnancy                                 | Pregnant Women                             | Mean: 27.8    | Female: (100)         |
|                          |                                       | Arm 2       | Individuals receiving medical abortion following telemedicine/hybrid visit              | 29,984     | Pregnancy                                 | Pregnant Women                             | Mean: 28.5    | Female: (100)         |
| Arias, 2022(5)           | Compares pre-COVID to COVID era       | Arm 1       | Pre-telehealth implementation                                                           | 780        | Postpartum visits                         | Adults (18-65)                             | Median: 30.07 | Female: 780 (100)     |
|                          |                                       | Arm 2       | Post-telehealth implementation                                                          | 799        | Postpartum visits                         | Adults (18-65)                             | Median: 30.35 | Female: 799 (100)     |
| Barequet, 2021(6)        | General COVID era                     | NR          | NR                                                                                      | NR         | NR                                        | NR                                         | NR            | NR                    |
| Baughman, 2021(7)        | Later COVID era (June 2020 and later) | Full group  | Overall                                                                                 | 63,722     | Diabetes                                  | Adult and Elderly                          | Mean: 62      | Female: 27667 (51.5)  |



| Author, Year              | Comparison Groups                     |             |                                                                        | N Patients    | Patient Health Concern/Clinical Condition | Target Population         | Age                                 | Sex, n (%)          |
|---------------------------|---------------------------------------|-------------|------------------------------------------------------------------------|---------------|-------------------------------------------|---------------------------|-------------------------------------|---------------------|
|                           | Study Period                          | Arm/ Group* | Arm Label*                                                             |               |                                           |                           |                                     |                     |
| Borgen, 2021(8)           | Early COVID era (March-June 2020)     | Arm 1       | Individuals with new COVID-19 not receiving telehealth care management | 593           | COVID-19                                  | Adult and Elderly (19-93) | Mean: 57.74                         | Male: (54)          |
|                           |                                       | Arm 2       | Individuals with new COVID-19 receiving telehealth care management     | 193           | COVID-19                                  | Adult and Elderly (19-93) | Mean: 57.44                         | Male: (61)          |
| Boshara, 2022(9)          | General COVID era                     | Full group  | Overall                                                                | 347           | HIV                                       | Adults (18-65)            | Mean: 44.2                          | Male: 217 (62.5)    |
| Bryson, 2023(10)          | General COVID era                     | Full group  | Patients receiving care in an adolescent medicine clinic               | 426           | Adolescent medicine                       | Between 13-26 years old   | Mean: 18.7                          | NR                  |
| Carlberg, 2020(11)        | Early COVID era (March-June 2020)     | Arm 1       | Patients receiving telehealth and in-person evaluation in the ED       | 149           | COVID-19                                  | NR                        | Mean: 39.3                          | NR                  |
|                           |                                       | Arm 2       | Patients receiving telehealth only evaluation in the ED                | 153           | COVID-19                                  | NR                        | Mean: 34.4                          | NR                  |
| Casariego-Vales, 2021(12) | Later COVID era (June 2020 and later) | Full group  | Diagnosed with COVID in Galicia/ASLAM                                  | 4,384         | COVID-19 Infection                        | Adults 18+                | Mean: NR<br>Median: NR<br>Range: NR | NR                  |
|                           |                                       | Arm 1       | Primary Care Monitoring                                                | 3,197         | COVID-19 Infection                        | Adults 18+                | Mean: NR<br>Median: NR<br>Range: NR | Female: (53.6)      |
|                           |                                       | Arm 2       | TELEA Telehealth Monitoring                                            | 1,187         | COVID-19 Infection                        | Adults 18+                | Mean: 65.6<br>Range: 15-99          | Female: (53.4)      |
| Chen, 2023(13)            | General COVID era                     | Full group  | Overall                                                                | NR            | Primary care appointment                  | Adults 18+                | NR                                  | Female: (57.6)      |
| Clark, 2022(14)           | Compares pre-COVID to post-COVID      | Full group  | Overall                                                                | 503           | Gestational diabetes mellitus             | NR                        | NR                                  | NR                  |
| Cobo-Calvo, 2022(15)      | Compares pre-COVID to COVID era       | Full group  | Full group                                                             | 28,230 visits | Multiple sclerosis                        | Not reported              | Mean: NR                            | NR                  |
| Cunningham, 2022(16)      | Compares pre-COVID to COVID era       | Arm 1       | Pre-pandemic (in-person)                                               | 72            | Opioid use disorder                       | Adult and Elderly         | Mean: 45.4                          | Female: 23 (31.9)   |
|                           |                                       | Arm 2       | Pandemic (telemedicine)                                                | 35            | Opioid use disorder                       | Adult and Elderly         | Mean: 46.9                          | Female: 12 (34.3)   |
| Cvietusa, 2022(17)        | Compares pre-COVID to COVID era       | Arm 1       | No asthma care                                                         | 2,977         | Asthma                                    | Adult and Elderly         | Mean: NR                            | Female: 1730 (35.2) |
|                           |                                       | Arm 2       | In-person only                                                         | 1,792         | Asthma                                    | Adult and Elderly         | Mean: NR                            | Female: 1139 (23.2) |
|                           |                                       | Arm 3       | Mixed (in-person and virtual)                                          | 1,084         | Asthma                                    | Adult and Elderly         | Mean: NR                            | Female: 758 (15.4)  |

| Author, Year        | Comparison Groups                     |             |                                                                                          | N Patients | Patient Health Concern/Clinical Condition  | Target Population | Age                                 | Sex, n (%)           |
|---------------------|---------------------------------------|-------------|------------------------------------------------------------------------------------------|------------|--------------------------------------------|-------------------|-------------------------------------|----------------------|
|                     | Study Period                          | Arm/ Group* | Arm Label*                                                                               |            |                                            |                   |                                     |                      |
|                     |                                       | Arm 4       | Virtual care only                                                                        | 1,952      | Asthma                                     | Adult and Elderly | Mean: NR                            | Female: 1293 (26.3)  |
| D'Anna, 2021(18)    | Compares pre-COVID to COVID era       | Arm 1       | In-person (2019)                                                                         | 180        | Stroke patients                            | Adult and Elderly | Median: 68.5                        | Male: 121 (67.22)    |
|                     |                                       | Arm 2       | Telephone (2020)                                                                         | 136        | Stroke patients                            | Adult and Elderly | Median: 65                          | Male: 99 (72.79)     |
| Duryea, 2021(19)    | Compares pre-COVID to COVID era       | Arm 1       | Pregnant individuals who received in-person pre-natal care                               | 6,559      | Pregnancy                                  | Pregnant Women    | Mean: 27.8                          | Female: (100)        |
|                     |                                       | Arm 2       | Pregnant individuals who received audio telehealth and in-person prenatal care           | 6,048      | Pregnancy                                  | Pregnant Women    | Mean: 27.7                          | Female: (100)        |
| Fortier, 2022(20)   | Compares pre-COVID to COVID era       | Arm 1       | in-person (usual care)                                                                   | 29         | U.S. Veterans mental health treatment      | Adults (18-65)    | Mean: 39.9                          | Male: 25 (86.2)      |
|                     |                                       | Arm 2       | Telehealth (virtual care)                                                                | 45         | U.S. Veterans mental health treatment      | Adults (18-65)    | Mean: 41.8                          | Male: 36 (80.0)      |
| Fredwall, 2021(21)  | Early COVID era (March-June 2020)     | Arm 1       | Patients seen in-person at Epilepsy Clinic                                               | 101        | Epilepsy                                   | Children (<18)    | Mean: NR<br>Median: NR<br>Range: NR | NR                   |
|                     |                                       | Arm 2       | Patients seen by telemedicine at Epilepsy Clinic                                         | 23         | Epilepsy                                   | Children (<18)    | Mean: 14                            | Female: (65)         |
| Frost, 2022(22)     | General COVID era                     | Full group  | Overall                                                                                  | 17,175     | Behavioral Health – Opioid use disorder    | 18 and above      | Mean: NR                            | Male: 15,835 (92.2%) |
| Gaetani, 2021(23)   | Compares pre-COVID to COVID era       | Arm 1       | Pre-COVID: Individuals with Hereditary Hemorrhagic Telangiectasia                        | 45         | HHT                                        | NR                | Mean: 56.7                          | Female: (53)         |
|                     |                                       | Arm 2       | COVID era: Individuals with Hereditary Hemorrhagic Telangiectasia (receiving telehealth) | 45         | HHT                                        | NR                | Mean: 56.7                          | Female: (53)         |
| Gainer, 2023(24)    | Later COVID era (June 2020 and later) | Full group  | Overall                                                                                  | 544        | Substance use disorder – Behavioral health | 18 and above      | Mean: NR                            | Female: 247 (45.4%)  |
| Gao, 2022(25)       | Early COVID era (March-June 2020)     | Full group  | Pregnant women receiving care                                                            | 1876       | Pregnancy                                  | All age groups    | Mean: NR                            | NR                   |
| Garmendia, 2021(26) | Compares pre-COVID to COVID era       | Arm 1       | Individuals with Sleep Apnea attending outpatient clinic, pre-covid/in-person            | 193        | Sleep Apnea                                | NR                | Mean: NR                            | NR                   |

| Author, Year        | Comparison Groups                     |             |                                                                                 | N Patients | Patient Health Concern/Clinical Condition                           | Target Population | Age          | Sex, n (%)              |
|---------------------|---------------------------------------|-------------|---------------------------------------------------------------------------------|------------|---------------------------------------------------------------------|-------------------|--------------|-------------------------|
|                     | Study Period                          | Arm/ Group* | Arm Label*                                                                      |            |                                                                     |                   |              |                         |
|                     |                                       | Arm 2       | Individuals with Sleep Apnea attending outpatient clinic, COVID era, telehealth | 77         | Sleep Apnea                                                         | NR                | Mean: 56     | Male: 75                |
| Griebeler, 2022(27) | Later COVID era (June 2020 and later) | Full group  | Overall                                                                         | 70         | Overweight/obesity                                                  | Adults (18-65)    | Mean: 42.2   | Female: 63 (90%)        |
| Hatef, 2022(28)     | Compares pre-COVID to COVID era       | Full group  | Overall                                                                         | 40,739,915 | Blue Health Blue Shield Claims data                                 | All age groups    | Range: 0-50+ | Female: 20480768 (50.3) |
| Hughes, 2022(29)    | Early COVID era (March-June 2020)     | Full group  | Overall                                                                         | NR         | Acute decompensated heart failure (follow up after hospitalization) | 18 and above      | Mean: NR     | Male: 87                |
| Jazayeri, 2022(30)  | General COVID era                     | Full group  | Overall                                                                         | 1,769      | Patients with abdominal pain in gastroenterology clinic             | Children (0-22)   | Mean: 11.6   | Male: 671 (59.3%)       |
| Kablinger, 2022(31) | Compares pre-COVID to COVID era       | Full group  | Full group                                                                      | 2145       | Psychiatric patients                                                | Adult and Elderly | Range: 18-87 | Female: 1485 (69.23)    |
| Kerestes, 2021(32)  | General COVID era                     | Arm 1       | Patients who received abortion services in-person                               | 110        | Family Planning                                                     | Pregnancy         | Mean: 28.1   | Female: (100)           |
|                     |                                       | Arm 2       | Patients who received abortion services via telehealth                          | 224        | Family Planning                                                     | Pregnancy         | Mean: 27.3   | Female: (100)           |
| Khosla, 2022(33)    | Compares pre-COVID to COVID era       | Arm 1       | Pre-pandemic                                                                    | 215        | Hypertensive disorder of pregnancy                                  | Adults (18-65)    | Mean: 29     | Female: 215 (100)       |
|                     |                                       | Arm 2       | Post-pandemic                                                                   | 258        | Hypertensive disorder of pregnancy                                  | Adults (18-65)    | Mean: 30     | Female: 258 (100)       |
| Klain, 2021(34)     | Compares pre-COVID to COVID era       | Arm 1       | 2019 visit (corresponding period to first visit during COVID-19)                | 75         | Differentiated thyroid cancer                                       | Adults (18-65)    | Mean: 46     | Male: 21 (28)           |
|                     |                                       | Arm 2       | 2020 first telemedicine visit during COVID-19                                   | 54         | Differentiated thyroid cancer                                       | Adults (18-65)    | Mean: 45     | Male: 13 (24)           |
|                     |                                       | Arm 3       | 2019 visit (corresponding period to follow-up visit during COVID-19)            | 450        | Differentiated thyroid cancer                                       | Adults (18-65)    | Mean: 50     | Male: 83 (18)           |
|                     |                                       | Arm 4       | 2020 telemedicine follow-up visit during COVID-19                               | 391        | Differentiated thyroid cancer                                       | Adults (18-65)    | Mean: 51     | Male: 91 (23)           |

| Author, Year         | Comparison Groups                 |             |                                                                                                    | N Patients                      | Patient Health Concern/Clinical Condition | Target Population | Age                 | Sex, n (%)                  |
|----------------------|-----------------------------------|-------------|----------------------------------------------------------------------------------------------------|---------------------------------|-------------------------------------------|-------------------|---------------------|-----------------------------|
|                      | Study Period                      | Arm/ Group* | Arm Label*                                                                                         |                                 |                                           |                   |                     |                             |
| Kolb, 2021(35)       | Early COVID era (March-June 2020) | Arm 1       | Patients receiving in-person outpatient care at ENT clinic (Recurrent Acute Otitis Media Cohort)   | 50                              | Otolaryngology                            | Children (<18)    | Mean: 24.4 (months) | Male: (62)                  |
|                      |                                   | Arm 2       | Patients receiving telehealth outpatient care at ENT clinic, (Recurrent Acute Otitis Media Cohort) | 50                              | Otolaryngology                            | Children (<18)    | Mean: 17 (months)   | Male: (60)                  |
|                      |                                   | Arm 1       | Patients receiving in-person outpatient care at ENT clinic, (Sleep-Disorder Breathing Cohort)      | 64                              | Otolaryngology                            | Children (<18)    | Mean: 5.29 (years)  | Male: (55)                  |
|                      |                                   | Arm 2       | Patients receiving telehealth outpatient care at ENT clinic, (Sleep-Disorder Breathing Cohort)     | 64                              | Otolaryngology                            | Children (<18)    | Mean: 5.47 (years)  | Male: (50)                  |
| Korycinski, 2022(36) | Early COVID era (March-June 2020) | Full group  | Full group                                                                                         | 293                             | COVID-19                                  | Adult and Elderly | Mean: 46.03         | Female: 163 (55.6)          |
| Levinson, 2021(37)   | Compares pre-COVID to COVID era   | Arm 1       | In-person                                                                                          | 60                              | Eating disorder                           | Adults (18-65)    | Mean: 25.07         | Cisgender women: 51 (85)    |
|                      |                                   | Arm 2       | Telehealth (Zoom)                                                                                  | 33                              | Eating disorder                           | Adults (18-65)    | Mean: 24.52         | Cisgender women: 29 (87.88) |
| Li, 2021(38)         | Early COVID era (March-June 2020) | Arm 1       | Patients triaged in-person for ophthalmologic issue                                                | 451                             | Ophthalmology                             | NR                | Median: 49          | Male: (55)                  |
|                      |                                   | Arm 2       | Patients receiving virtual triage for ophthalmologic issue                                         | 404                             | Ophthalmology                             | NR                | Median: 43          | Female: (54)                |
| Lindhagen, 2022(39)  | Compares pre-COVID to COVID era   | Full group  | Full group                                                                                         | 894                             | Inflammatory bowel disease                | Adults (18-65)    | Mean: 47.6          | Female: 422 (47.2)          |
| Liou, 2022(40)       | Compares pre-COVID to COVID era   | Full group  | Patients undergoing eye movement desensitization and reprocessing                                  | Baseline: 267<br>Follow-up: 232 | Mental health                             | 18 and above      | Mean: 51.4          | Female: 203 (70.5)          |
| Liu, 2021(41)        | Early COVID era (March-June 2020) | Full group  | Full Group clinic patients at various outpatient facilities                                        | 1,376                           | Gastroenterology/Rheumatology             | NR                | Mean: 55.06         | Female: (52.3)              |
|                      |                                   | Arm 1       | Pre-COVID clinic patients at various outpatient facilities                                         | 692                             | Gastroenterology/Rheumatology             | NR                | Mean: 55.63         | Female: (53.6)              |

| Author, Year       | Comparison Groups                     |             |                                                            | N Patients | Patient Health Concern/Clinical Condition | Target Population | Age         | Sex, n (%)         |
|--------------------|---------------------------------------|-------------|------------------------------------------------------------|------------|-------------------------------------------|-------------------|-------------|--------------------|
|                    | Study Period                          | Arm/ Group* | Arm Label*                                                 |            |                                           |                   |             |                    |
|                    |                                       | Arm 2       | COVID era clinic patients at various outpatient facilities | 684        | Gastroenterology/Rheumatology             | NR                | Mean: 54.47 | Female: (51)       |
| Mair, 2021(42)     | Compares pre-COVID to COVID era       | Arm 1       | Pre-COVID (2019)                                           | 210        | Rheumatology patients                     | NR                | Mean: 54.6  | Female: 142 (67.6) |
|                    |                                       | Arm 2       | Telehealth                                                 | 340        | Rheumatology patients                     | NR                | Mean: 55.6  | Female: 244 (71.8) |
| Mathews, 2022(43)  | Compares pre-COVID to COVID era       | Full group  | NR                                                         | NR         | Pain management by nurse practitioners    | Adults (22-90)    | NR          | NR                 |
| McCoy, 2022(44)    | Compares pre-COVID to COVID era       | Arm 1       | In-person before telemedicine                              | 113        | Pediatric otolaryngology patients         | Children (<18)    | Mean: 4.99  | Female: 43 (38.1)  |
|                    |                                       | Arm 2       | Telemedicine                                               | 59         | Pediatric otolaryngology patients         | Children (<18)    | Mean: 6.15  | Female: 30 (50.8)  |
|                    |                                       | Arm 3       | In-person during telemedicine                              | 4          | Pediatric otolaryngology patients         | Children (<18)    | Mean: 8.78  | Female: 3 (75)     |
| McNamara, 2021(45) | Compares pre-COVID to COVID era       | Full group  | Full group                                                 | 537        | Primary care, pharmacy visit              | Adult and Elderly | Mean: 62.52 | Female: 273 (50.8) |
| Metcalfe, 2023(46) | Later COVID era (June 2020 and later) | Full group  | Overall                                                    | 150        | Otology referral                          | 18 and above      | Mean: 55    | Female: 71 (47)    |
| Minsky, 2021(47)   | Compares pre-COVID to COVID era       | Full group  | Overall                                                    | 279        | Overweight                                | NR                | Mean: 53    | Female: (69)       |
| Mossack, 2022(48)  | Later COVID era (June 2020 and later) | Full group  | Overall                                                    | 48         | Overactive bladder                        | 18 and above      | Mean: 51    | Female: (100)      |
| Offiah, 2022(49)   | Compares pre-COVID to COVID era       | Arm 1       | Traditional clinic                                         | 1,220      | Cardiology patients                       | Adult and Elderly | Mean: 61    | Female: 548 (44.9) |
|                    |                                       | Arm 2       | Virtual clinic                                             | 496        | Cardiology patients                       | Adult and Elderly | Mean: 60    | Female: 208 (41.9) |
| Ostberg, 2022(50)  | General COVID era                     | Arm 2       | Telehealth (Zoom)                                          | 455        | Patients with chest pain                  | Adults (18-65)    | Median: 44  | Male: 228 (50.1)   |
| Parise, 2021(51)   | Early COVID era (March-June 2020)     | Arm 1       | Not included in telemedicine study                         | 43         | Type-1 diabetes                           | Adults (18-65)    | Mean: 37    | Male: 21 (49)      |
|                    |                                       | Arm 2       | Included in telemedicine study                             | 166        | Type-1 diabetes                           | Adults (18-65)    | Mean: 40    | Male: 80 (48.2)    |

| Author, Year       | Comparison Groups                                    |            |                                                                                     | N Patients | Patient Health Concern/Clinical Condition | Target Population | Age                                 | Sex, n (%)          |
|--------------------|------------------------------------------------------|------------|-------------------------------------------------------------------------------------|------------|-------------------------------------------|-------------------|-------------------------------------|---------------------|
|                    | Study Period                                         | Arm/Group* | Arm Label*                                                                          |            |                                           |                   |                                     |                     |
| Phillips, 2021(52) | Early COVID era (March-June 2020)                    | Arm 1      | Individuals presenting to initial in-person visit at respiratory assessment center  | 741        | Pulmonary                                 | NR                | Median: 43.5                        | Female: (63.6)      |
|                    |                                                      | Arm 2      | Individuals presenting to initial telehealth visit at respiratory assessment center | 564        | Pulmonary                                 | NR                | Median: 42.05                       | Female: (66.8)      |
| Piga, 2022(53)     | Early COVID era (March-June 2020)                    | Full group | Patients with inflammatory rheumatologic diseases                                   | 106        | Rheumatology                              | NR                | Median: 45.4                        | Male: 47 (44.3)     |
| Pinsker, 2021(54)  | Early COVID era (March-June 2020)                    | Arm 1      | Individuals with diabetes receiving in-person insulin pump training                 | NR         | Diabetes                                  | Other (define)    | Mean: NR<br>Median: NR<br>Range: NR | NR                  |
|                    |                                                      | Arm 2      | Individuals with diabetes receiving virtual insulin pump training                   | 8,984      | Diabetes                                  | Other (define)    | Mean: NR<br>Median: NR<br>Range: NR | NR                  |
| Prato, 2022(55)    | Later COVID era (June 2020 and later)                | Full group | Overall                                                                             | 40         | Tourette syndrome                         | Children (<18)    | Mean: 13.5                          | Male: 36 (90)       |
| Reddy, 2021(56)    | Early COVID era (March-June 2020)                    | Full group | Overall                                                                             | 1,744      | Cancer patients                           | Adult and Elderly | Median: 60                          | Female: 924 (53)    |
| Rene, 2022(57)     | Early COVID era (March-June 2020)                    | Full group | Overall                                                                             | 338        | Depression/Anxiety                        | 18 and above      | Mean: 50.6                          | Male: 45 (28.7)     |
| Ripp, 2022(58)     | Compares pre-COVID to COVID era                      | Arm 1      | In-person (2019)                                                                    | 1,077      | Developmental-behavioral pediatrics       | Children (<18)    | Mean: 9.4                           | Female: 270 (25.1)  |
|                    |                                                      | Arm 2      | Telehealth (2020)                                                                   | 354        | Developmental-behavioral pediatrics       | Children (<18)    | Mean: 9.3                           | Female: 91 (25.7)   |
| Rowe, 2021(59)     | Early COVID era (March-June 2020)                    | Arm 1      | Telephone Cardiology Outpatient Visits                                              | 1,118      | Cardiology                                | NR                | Median: 67<br>Range: 54-76          | Male: (56.4)        |
|                    |                                                      | Arm 2      | Video Cardiology Outpatient Visits                                                  | 327        | Cardiology                                | NR                | Median: 61<br>Range: 46-71          | Male: (65.1)        |
| Ryskina, 2021(60)  | Compares pre-COVID to COVID era<br>General COVID era | Arm 1      | Patients having in-person primary care appointment                                  | 6,792      | Primary Care                              | Elders (65+)      | Mean: 74.8                          | Female: (60.8)      |
|                    |                                                      | Arm 2      | Patients having telehealth primary care appointment                                 | 10,311     | Primary Care                              | Elders (65+)      | Mean: 75.1                          | Female: (60.5)      |
| Severino, 2022(61) | General COVID era                                    | Full group | Overall                                                                             | 184        | Heart failure patients                    | 18 and above      | Mean:70.5                           | Female: 31 (34)     |
| Sevilis, 2022(62)  | Early COVID era (March-June 2020)                    | Arm 1      | Pre-COVID                                                                           | 15,226     | Stroke patients                           | Adult and Elderly | Mean: 67                            | Female: 8082 (53.1) |
|                    |                                                      | Arm 2      | COVID                                                                               | 11,105     | Stroke patients                           | Adult and Elderly | Mean: 66.7                          | Female: 5802 (52.2) |

| Author, Year      | Comparison Groups                                       |             |                                                                             | N Patients | Patient Health Concern/Clinical Condition | Target Population | Age                        | Sex, n (%)             |
|-------------------|---------------------------------------------------------|-------------|-----------------------------------------------------------------------------|------------|-------------------------------------------|-------------------|----------------------------|------------------------|
|                   | Study Period                                            | Arm/ Group* | Arm Label*                                                                  |            |                                           |                   |                            |                        |
| Shah, 2022(63)    | General COVID era                                       | Full group  | Overall                                                                     | 16,987     | Patients with ED visits                   | Adult (18-65)     | Mean: 53                   | NR                     |
| Sharma, 2020(64)  | Compares pre-COVID to early COVID era (March-June 2020) | Arm 1       | IBD Services before COVID (2019)                                            | 1,036      | Irritable Bowel Disease (IBD)             | NR                | Median: 36<br>Range: 22-76 | Female: (46)           |
|                   |                                                         | Arm 2       | IBD Services after COVID (2020)                                             | 334        | Irritable Bowel Disease (IBD)             | NR                | Median: 29<br>Range: 17-91 | Female: (36)           |
| Sohail, 2023(65)  | General COVID era                                       | Full group  | Overall                                                                     | NR         | HIV primary care appointment              | NR                | Mean: NR                   | Male: (69.7)           |
| Sun, 2022(66)     | General COVID era                                       | Full group  | Overall                                                                     | NR         | Adults with diabetes                      | 18 and above      | Mean: NR                   | Female: 703 (49.37)    |
| Szigety, 2022(67) | Compares pre-COVID to early COVID era (March-June 2020) | Full group  | Full group                                                                  | 4,327      | Genetic conditions                        | Children (<18)    | Mean: 87.9                 | Female: 2258 (46.2)    |
| Tarn, 2021(68)    | Compares pre-COVID to early COVID era (March-June 2020) | Arm 1       | Patients receiving in-person outpatient care at primary care clinic         | 52         | Primary Care                              | NR                | Mean: 26.4<br>Range: 1-72  | Female: (42.3)         |
|                   |                                                         | Arm 2       | Patients receiving telephone outpatient care at primary care clinic         | 55         | Primary Care                              | NR                | Mean: 40.7<br>Range: 1-89  | Female: (70.9)         |
|                   |                                                         | Arm 3       | Patients receiving telehealth(video) outpatient care at primary care clinic | 89         | Primary Care                              | NR                | Mean: 40.3<br>Range: 4-73  | Female: (64)           |
| Tchang, 2022(69)  | Compares pre-COVID to COVID era                         | Arm 1       | In-person                                                                   | 69         | Overweight/Obese patients                 | Adults (18-65)    | Median: 56                 | Female: 50 (72)        |
|                   |                                                         | Arm 2       | Hybrid                                                                      | 85         | Overweight/Obese patients                 | Adults (18-65)    | Median: 49                 | Female: 64 (75)        |
|                   |                                                         | Arm 3       | Video                                                                       | 91         | Overweight/Obese patients                 | Adults (18-65)    | Median: 49                 | Female: 71 (78)        |
| Wabe, 2022(70)    | Compares pre-COVID to COVID era                         | Arm 1       | Face to face                                                                | 8,303,233  | General practice                          | Adult and Elderly | Mean: NR                   | Female: 4684918 (56.4) |
|                   |                                                         | Arm 2       | Telehealth                                                                  | 5,304,983  | General practice                          | Adult and Elderly | Mean: NR                   | Female: 3324348 (62.7) |
| Walker, 2023(71)  | General COVID era                                       | Full group  | Overall                                                                     | 31,654     | NR                                        | NR                | Mean: NR                   | NR                     |
| Watson, 2021(72)  | General COVID era                                       | Arm 1       | Pre-telephone clinic (face to face)                                         | 814        | Cancer patients                           | Adult and Elderly | Mean: 62.52                | NR                     |

| Author, Year        | Comparison Groups                 |            |                                                                            | N Patients | Patient Health Concern/Clinical Condition       | Target Population             | Age                                            | Sex, n (%)                    |
|---------------------|-----------------------------------|------------|----------------------------------------------------------------------------|------------|-------------------------------------------------|-------------------------------|------------------------------------------------|-------------------------------|
|                     | Study Period                      | Arm/Group* | Arm Label*                                                                 |            |                                                 |                               |                                                |                               |
|                     |                                   | Arm 2      | Post-introduction (telephone)                                              | 910        | Cancer patients                                 | Adult and Elderly             | Mean: 62.77                                    | NR                            |
| Ye, 2022(73)        | General COVID era                 | Arm 1      | In-person                                                                  | 20,745     | High blood pressure                             | Adult and Elderly             | Mean: 66.7                                     | Female: 10256 (49.4)          |
|                     |                                   | Arm 2      | 1 telemedicine visit                                                       | 6,878      | High blood pressure                             | Adult and Elderly             | Mean: 65.7                                     | Female: 3553 (51.7)           |
|                     |                                   | Arm 3      | 2 or more telemedicine visits                                              | 5,104      | High blood pressure                             | Adult and Elderly             | Mean: 65.4                                     | Female: 3236 (63.4)           |
| Zayde, 2021(74)     | Compares pre-COVID to COVID era   | Full group | Full group                                                                 | 12 dyads   | Caregivers and children (general mental health) | Children and adult caregivers | Mean: Caregiver age: 44.17<br>Child age: 11.08 | Female (for children): 3 (25) |
| Zhao, 2021(75)      | Compares pre-COVID to COVID era   | Arm 1      | Individuals with heart failure attending in-person outpatient appointments | 39         | Heart Failure                                   | NR                            | Mean: 71                                       | Female: (25.6)                |
|                     |                                   | Arm 2      | Individuals with heart failure attending telehealth appointments           | 43         | Heart Failure                                   | NR                            | Mean: 70.4                                     | Female: (27.9)                |
| Zhu, 2021(76)       | Early COVID era (March-June 2020) | Arm 1      | 2019 cohort (face to face)                                                 | 1,443      | Rheumatology patients                           | Adults (18-65)                | Median: 55                                     | Female: 902 (70.1)            |
|                     |                                   | Arm 2      | 2020 cohort (telehealth)                                                   | 1,597      | Rheumatology patients                           | Adults (18-65)                | Median: 54                                     | Female: 1042 (69.8)           |
| Zimmerman, 2021(77) | Early COVID era (March-June 2020) | Arm 1      | In-person                                                                  | 207        | General                                         | Adults (18-65)                | Mean: 38.16                                    | Male: 62 (30)                 |
|                     |                                   | Arm 2      | Telehealth                                                                 | 207        | General                                         | Adults (18-65)                | Mean: 35.88                                    | Male: 55 (26.6)               |

ED=emergency department; ENT= ear, nose, and throat; F2F=face to face; N=sample size; NR=not reported; RIC=referred to clinic

\* Study Arm/Group is defined in the column called Arm Label. Comparisons include in-person (arm 1) vs. telehealth (arm 2) visits and services provided in pre-COVID-19 era (assuming those services were predominantly in-person, arm 1) to telehealth in the COVID-19 era (arm 2). Some studies reported participants characteristics only for full population, others reported them for comparison groups.

### Supplementary Table 2-C. Provider/ Health System Characteristics of Studies Investigating the Effectiveness of Telehealth vs. In-person Care During COVID-19.

| Author, year             | Healthcare System                                         | Specialty/Clinical Focus/Health System Setting |
|--------------------------|-----------------------------------------------------------|------------------------------------------------|
| Adams, 2023(1)           | Large/Regionally representative                           | Federally Qualified Health Centers             |
| Adepoju, 2022(2)         | Large/Regionally representative                           | Federally Qualified Health Centers             |
| Afonso Nogueira, 2021(3) | Representative of a single large facility or organization | Heart failure clinic in hospital               |
| Aiken, 2021(4)           | NR                                                        | Abortion providers                             |
| Arias, 2022(5)           | Representative of a single large facility or organization | Postpartum care                                |
| Barequet, 2021(6)        | NR                                                        | NR                                             |
| Baughman, 2021(7)        | Large/Regionally representative                           | Primary care (wide, full-range care)           |
| Borgen, 2021(8)          | NR                                                        | Home-care services                             |
| Boshara, 2022(9)         | Large/Regionally representative                           | HIV                                            |



| <b>Author, year</b>       | <b>Healthcare System</b>                                  | <b>Specialty/Clinical Focus/Health System Setting</b> |
|---------------------------|-----------------------------------------------------------|-------------------------------------------------------|
| Bryson, 2023(10)          | Limited study, small facility                             | Adolescent medicine                                   |
| Carlberg, 2020(11)        | Limited study, small facility                             | Tertiary care, Level I trauma center                  |
| Casariago-Vales, 2021(12) | Regional healthcare network                               | At home monitoring                                    |
| Chen, 2023(13)            | Large/Regionally representative                           | Primary care (wide, full-range care)                  |
| Clark, 2022(14)           | Limited study, small facility                             | Pregnancy clinic                                      |
| Cobo-Calvo, 2022(15)      | Limited study, small facility                             | MS/Autoimmune disorder center                         |
| Cunningham, 2022(16)      | Representative of a single large facility or organization | Rehab/PT/OT/etc.                                      |
| Cvietusa, 2022(17)        | Large/Regionally representative                           | Primary care (wide, full-range care)                  |
| D'Anna, 2021(18)          | Representative of a single large facility or organization | Primary care (wide, full-range care)                  |
| Duryea, 2021(19)          | NR                                                        | Antenatal and postpartum care clinic                  |
| Fortier, 2022(20)         | Large/Regionally representative                           | Mental health                                         |
| Fredwall, 2021(21)        | NR                                                        | Epilepsy clinic                                       |
| Frost, 2022(22)           | Nationally representative                                 | Behavioral health                                     |
| Gaetani, 2021(23)         | NR                                                        | Hereditary hemorrhagic telangiectasia center          |
| Gainer, 2023(24)          | Limited study, small facility                             | Behavioral health                                     |
| Gao, 2022(25)             | Large/Regionally representative                           | OBGYN                                                 |
| Garmendia, 2021(26)       | NR                                                        | Sleep unit                                            |
| Griebeler, 2022(27)       | Large/Regionally representative                           | Endocrinology and Metabolism Institute                |
| Hatef, 2022(28)           | Nationally representative                                 | Not reported                                          |
| Hughes, 2022(29)          | Limited study, small facility                             | Acute decompensated heart failure                     |
| Jazayeri, 2022(30)        | Limited study, small facility                             | Gastroenterology clinic                               |
| Kablinger, 2022(31)       | Limited study, small facility                             | Mental health                                         |
| Kerestes, 2021(32)        | NR                                                        | Family planning clinic                                |
| Khosla, 2022(33)          | Limited study, small facility                             | Primary care (wide, full-range care)                  |
| Klain, 2021(34)           | NR                                                        | Radiometabolic Unit                                   |
| Kolb, 2021(35)            | NR                                                        | NR                                                    |
| Korycinski, 2022(36)      | Limited study, small facility                             | Primary care (wide, full-range care)                  |
| Levinson, 2021(37)        | Limited study, small facility                             | Eating disorder                                       |
| Li, 2021(38)              | NR                                                        | Eye hospital                                          |
| Lindhagen, 2022(39)       | Representative of a single large facility or organization | Gastroenterology department                           |
| Liou, 2022(40)            | Limited study, small facility                             | Mental health                                         |
| Liu, 2021(41)             | NR                                                        | NR                                                    |
| Mair, 2021(42)            | NR                                                        | Rheumatology clinic                                   |

| <b>Author, year</b> | <b>Healthcare System</b>                                  | <b>Specialty/Clinical Focus/Health System Setting</b>  |
|---------------------|-----------------------------------------------------------|--------------------------------------------------------|
| Mathews, 2022(43)   | Representative of a single large facility or organization | Pain management in the context of general medical care |
| McCoy, 2022(44)     | Representative of a single large facility or organization | Otolaryngology                                         |
| McNamara, 2021(45)  | Representative of a single large facility or organization | Pharmacy visit                                         |
| Metcalfe, 2023(46)  | Limited study, small facility                             | Otorhinolaryngology                                    |
| Minsky, 2021(47)    | NR                                                        | Weight management clinic                               |
| Mossack, 2022(48)   | Limited study, small facility                             | Urology                                                |
| Offiah, 2022(49)    | Large/Regionally representative                           | General cardiology clinics in hospital                 |
| Ostberg, 2022(50)   | NR                                                        | Primary care (wide, full-range care)                   |
| Parise, 2021(51)    | Representative of a single large facility or organization | Diabetes care center                                   |
| Phillips, 2021(52)  | NR                                                        | Primary care run respiratory assessment center         |
| Piga, 2022(53)      | Representative of a single large facility or organization | Rheumatology clinic                                    |
| Pinsker, 2021(54)   | NR                                                        | Diabetic center                                        |
| Prato, 2022(55)     | Limited study, small facility                             | Pediatric neurology clinic                             |
| Reddy, 2021(56)     | Limited study, small facility                             | Cancer care                                            |
| Rene, 2022(57)      | Large/Regionally representative                           | Primary care (wide, full-range care)                   |
| Ripp, 2022(58)      | Representative of a single large facility or organization | Mental health                                          |
| Rowe, 2021(59)      | NR                                                        | Cardiology clinic                                      |
| Ryskina, 2021(60)   | Regional healthcare network                               | Primary care clinic                                    |
| Severino, 2022(61)  | Limited study, small facility                             | NR                                                     |
| Sevilis, 2022(62)   | Nationally representative                                 | Stroke care                                            |
| Shah, 2022(63)      | Large/Regionally representative                           | ED Visits                                              |
| Sharma, 2020(64)    | NR                                                        | NR                                                     |
| Sohail, 2023(65)    | Large/Regionally representative                           | Primary care (wide, full-range care)                   |
| Sun, 2022(66)       | Representative of a single large facility or organization | Primary care (wide, full-range care)                   |
| Szigety, 2022(67)   | Limited study, small facility                             | Clinical genetics                                      |
| Tarn, 2021(68)      | NR                                                        | NR                                                     |
| Tchang, 2022(69)    | Limited study, small facility                             | Wellness/Health education                              |
| Wabe, 2022(70)      | Large/Regionally representative                           | Primary care (wide, full-range care)                   |
| Walker, 2023(71)    | Nationally representative                                 | NR                                                     |
| Watson, 2021(72)    | Representative of a single large facility or organization | Cancer care                                            |
| Ye, 2022(73)        | Representative of a single large facility or organization | Primary care (wide, full-range care)                   |
| Zayde, 2021(74)     | Limited study, small facility                             | Mental health                                          |
| Zhao, 2021(75)      | Representative of a single large facility or organization | Multidisciplinary clinic in hospital                   |

| Author, year                                             | Healthcare System                                         | Specialty/Clinical Focus/Health System Setting |
|----------------------------------------------------------|-----------------------------------------------------------|------------------------------------------------|
| Zhu, 2021(76)                                            | Representative of a single large facility or organization | Rheumatology                                   |
| Zimmerman, 2021(77)                                      | Representative of a single large facility or organization | Hospital                                       |
| ED= Emergency Department; N=sample size; NR=not reported |                                                           |                                                |

**Supplementary Table 3. Summary of Evidence for the Effects of Telehealth Versus In-person Care by Outcome Categories and Clinical Areas.\***

| Outcome Categories                                       |                                             | Clinical Areas                              |                                            |                                               |                                        |                                                                       |                                                |                                            |
|----------------------------------------------------------|---------------------------------------------|---------------------------------------------|--------------------------------------------|-----------------------------------------------|----------------------------------------|-----------------------------------------------------------------------|------------------------------------------------|--------------------------------------------|
|                                                          |                                             | Care for General Medical Conditions, Adults | Care for General Medical Conditions, Child | Care for General Medical Conditions, All Ages | Care for Specific Conditions, COVID-19 | Care for Specific Conditions, Pregnancy/ Prenatal/ Gynecological care | Care for Specific Conditions, Other Conditions | Care for General Behavioral/ Mental Health |
| <b>Healthcare utilization (n=38 studies)<sup>b</sup></b> | Emergency Department visits                 | Low<br>P (1)                                | Low<br>= (1)                               | Moderate<br>P/T (2)                           | Low<br>P (3)                           | Low<br>P (1)                                                          | Low<br>T (6)                                   | No evidence                                |
|                                                          | Hospitalization                             | Moderate<br>= (3)                           | No evidence                                | Moderate<br>P/T (2)                           | Low<br>P (2)                           | Low<br>P (2)                                                          | Low<br>T (11)                                  | No evidence                                |
|                                                          | Readmission                                 | No evidence                                 | No evidence                                | No evidence                                   | Low<br>= (2)                           | Low<br>= (1)                                                          | Low<br>T (1)                                   | No evidence                                |
| <b>Clinical outcomes (n=34 studies)<sup>b</sup></b>      | Mortality                                   | No evidence                                 | No evidence                                | No evidence                                   | No evidence                            | Low<br>= (2)                                                          | Low<br>T (4)                                   | No evidence                                |
|                                                          | Patient-reported outcomes                   | No evidence                                 | No evidence                                | No evidence                                   | No evidence                            | Low<br>P (2)                                                          | Low<br>T (1)                                   | Low<br>T (5)                               |
|                                                          | Condition-specific clinical outcomes        | Low<br>= (1)                                | No evidence                                | No evidence                                   | No evidence                            | Low<br>P (4)                                                          | Low<br>P (8)                                   | Low<br>T (2)                               |
|                                                          | Adverse events                              | Low<br>T (1)                                | No evidence                                | No evidence                                   | No evidence                            | Low<br>T (3)                                                          | Low<br>T (2)                                   | Low<br>= (1)                               |
| <b>Process outcomes (n=61 studies)<sup>†</sup></b>       | Missed visits                               | Low<br>P (2)                                | No evidence                                | Low<br>T (1)                                  | No evidence                            | Low<br>T (3)                                                          | Low<br>T (6)                                   | Low<br>P (2)                               |
|                                                          | Case resolution/ Duplication of services    | No evidence                                 | Low<br>= (1)                               | Moderate<br>P/T (2)                           | Insufficient<br>? \ (1)                | Insufficient<br>? \ (1)                                               | Low<br>T (9)                                   | No evidence                                |
|                                                          | Change in therapy/ Medication               | Moderate<br>P (2)                           | No evidence                                | No evidence                                   | No evidence                            | No evidence                                                           | Low<br>P (9)                                   | No evidence                                |
|                                                          | Therapy/ Medication adherence               | Low<br>T (3)                                | No evidence                                | No evidence                                   | No evidence                            | No evidence                                                           | Low<br>P (5)                                   | Low<br>T (5)                               |
|                                                          | Up-to-date labs and paraclinical assessment | No evidence                                 | Low<br>P (1)                               | No evidence                                   | No evidence                            | Low<br>= (1)                                                          | Low<br>P (7)                                   | No evidence                                |

**Insufficient, orange:** insufficient evidence; **Moderate, green:** moderate strength of evidence; **Low, blue:** low strength of evidence.  
<sup>\*</sup> Intervention T: favors telehealth; P: favors in-person; P/T: acute care patients favor in-person and chronic care patients favor telehealth; = little to no difference between in-person vs. telehealth; ?\: insufficient evidence to make a conclusion. Numbers in parentheses present the number of studies for each cell.  
<sup>†</sup> The total is more than 63 included studies as some studies reported multiple outcomes.

**Supplementary Table 4-A. Study Results Investigating the Effectiveness of Telehealth vs. In-person Care by Outcome Category and Clinical Area – Healthcare Utilization, Emergency Department Visits.**

| Author, Year              | Clinical Area | Arm Definition (n)                                                                                                                                                                                    | Outcome                                         | Time of Analysis | Participants With Outcomes, n(%)                           | Comparison                                                                                                           | Adjusted                                                                                   |
|---------------------------|---------------|-------------------------------------------------------------------------------------------------------------------------------------------------------------------------------------------------------|-------------------------------------------------|------------------|------------------------------------------------------------|----------------------------------------------------------------------------------------------------------------------|--------------------------------------------------------------------------------------------|
| Shah, 2022(63)            | 1a            | Arm 1 – In-person ED visits (11,818)<br>Arm 2 – Telehealth ED visits (5,169)                                                                                                                          | ED return visits                                | 30 days          | Arm 1 – Events: 1,865 (0.16)<br>Arm 2 – Events: 937 (0.18) | Ref: Arm 1<br>Odds ratio: 1.23<br>(95% CI: 1.09 to 1.39), p=0.001                                                    | Sociodemographic and clinical factors, time from ED discharge to follow-up                 |
| Jazayeri, 2022(30)        | 1b            | Arm 1 – In-person (1,131)<br>Arm 2 – Telehealth (638)                                                                                                                                                 | ED visits                                       | 3 months         | NR (NR)                                                    | Ref: Arm 1<br>t-test between means: Arm 1: 0.037 (SD 0.246)<br>t-test between means: Arm 2: 0.017 (SD 0.142), p=0.61 | No                                                                                         |
| Hatef, 2022(28)           | 1c            | Arm 1 – First encounter in-person (493,716)<br>Arm 2 – First encounter telemedicine (113,857)                                                                                                         | Acute ambulatory care, ED follow-up             | 14 days          | NR (NR)                                                    | Ref: Arm 1<br>Odds ratio: 1.11<br>(95% CI: 1.06 to 1.16), p=NR                                                       | Type of acute and chronic ambulatory care sensitive conditions treated during the episode. |
|                           |               | Arm 1 – First encounter in-person (410,743)<br>Arm 2 – First encounter telemedicine (94,481)                                                                                                          | Chronic ambulatory care, ED follow-up           | 14 days          | NR (NR)                                                    | Ref: Arm 1<br>Odds ratio: 0.96<br>(95% CI: 0.92 to 1.01), p=NR                                                       | Type of acute and chronic ambulatory care sensitive conditions treated during the episode. |
| Phillips, 2021(52)        | 1c            | Arm 1 – Individuals presenting to initial in-person visit at Respiratory Assessment center (741)<br>Arm 2 – Individuals presenting to initial telehealth visit at Respiratory Assessment Center (564) | ED visit                                        | 14 Days          | Arm 1 – Events: 29 (3.9)<br>Arm 2 – Events: 28 (5)         | Ref: Arm 1<br>Chi-squared: NR,<br>p=0.357                                                                            | No                                                                                         |
| Borgen, 2021(8)           | 2a            | Arm 1 – Individuals with new COVID-19 not receiving telehealth care management discharged from the hospital (593)<br>Arm 2 – Individuals with new COVID-19 receiving telehealth care management (192) | Hospital re-encounters (ED or Observation Unit) | 30 days          | Arm 1 – 167 (28.2)<br>Arm 2 – 24 (12.5)                    | Ref: Arm 1,<br>Chi-squared test of independence:<br>19.3, p<0.001                                                    | No                                                                                         |
| Casariago-Vales, 2021(12) | 2a            | Arm 1 – Primary Care Monitoring (3197)<br>Arm 2 – TELEA Telehealth Monitoring (1187)                                                                                                                  | ED follow-up within study period                | 68 days          | Arm 1 – Events: 227 (7.1)<br>Arm 2 – Events: 307 (25.9)    | Ref: Arm 1,<br>Assumed t-test/man Whitney:<br>NR, p<.0001                                                            | No                                                                                         |
| Korycinski, 2022 (36)     | 2a            | Arm 1 – Control (154)<br>Arm 2 – Telephone based intervention (139)                                                                                                                                   | ED visit                                        | 30 days          | Arm 1 – 24 (15.6)<br>Arm 2 – 13 (10.1)                     | Ref: Arm 1,<br>p=0.117                                                                                               | No                                                                                         |
| Kerestes, 2021(32)        | 2b            | Arm 1 – In person (94)<br>Arm 2 – Telemedicine + med pick up (124)<br>Arm 2 – Telemedicine + Mailed Medicine (69)                                                                                     | ED visit                                        | 252 days         | Arm 1 – 2 (2.1)<br>Arm 2 – 5 (4)<br>Arm 3 – 4 (5.8)        | NR                                                                                                                   | No                                                                                         |

| Author, Year             | Clinical Area | Arm Definition (n)                                                                                                                                                                                                                                          | Outcome                                                    | Time of Analysis          | Participants With Outcomes, n(%)                                                                                                                                                                                                                                                                 | Comparison                                                                   | Adjusted                                                               |
|--------------------------|---------------|-------------------------------------------------------------------------------------------------------------------------------------------------------------------------------------------------------------------------------------------------------------|------------------------------------------------------------|---------------------------|--------------------------------------------------------------------------------------------------------------------------------------------------------------------------------------------------------------------------------------------------------------------------------------------------|------------------------------------------------------------------------------|------------------------------------------------------------------------|
| Afonso Nogueira, 2021(3) | 2c            | Arm 1 – Individuals with Heart Failure attending outpatient cardiology appointments (Pre-COVID) (160)<br>Arm 2 – Individuals with Heart Failure attending outpatient cardiology appointments (43)                                                           | ED visits for heart failure                                | 497 days                  | Arm 1 -214 (NR)<br>Arm 2 – 52 (NR)                                                                                                                                                                                                                                                               | Ref: Arm 1, Chi-squared: NR, p=0.27                                          | No                                                                     |
| Cvietusa, 2022(17)       | 2c            | Arm 1 – No asthma care (Baseline: NR, Follow-up: 2,977)<br>Arm 2 – In-person only (Baseline: NR, Follow-up: 1,792)<br>Arm 3 – Mixed (in- person and virtual) (Baseline: NR, Follow-up: 1,084)<br>Arm 4 – Virtual care only (Baseline: NR, Follow-up: 1,952) | ED/urgent care visit                                       | NR                        | Arm 1 – Continuous data<br>Baseline: NR Follow-up: Mean: 0 (SE 0)<br>Arm 2 – Continuous data<br>Baseline: NR Follow-up: Mean: 0.048 (SE 0.012)<br>Arm 3 – Continuous data<br>Baseline: NR Follow-up: Mean: 0.137 (SE 0.033)<br>Arm 4 – Continuous data<br>Baseline: NR Follow-up: Mean: 0 (SE 0) | Ref: Arm 1, p=<0.001 (for all comparisons)                                   | Age, sex, race, baseline value of outcome, person-year, overdispersion |
| Gaetani, 2021(23)        | 2c            | Arm 1 – Pre-COVID: Individuals with Hereditary Hemorrhagic Telangiectasia (45)<br>Arm 2 – Post-COVID: Individuals with Hereditary Hemorrhagic Telangiectasia (receiving telehealth) (45)                                                                    | ED visit or Hospitalization                                | 244 Days                  | Arm 1 – 11 (24.4)<br>Arm 2 – 9 (20)                                                                                                                                                                                                                                                              | Ref: Arm 1 % change from baseline: -0.044, p=not significant                 | No                                                                     |
| Reddy, 2021(56)          | 2c            | Arm 1 – Before virtual care (in-person) (763)<br>Arm 2 – Transition to virtual care (168)<br>Arm 3 – After transition to virtual care (813)                                                                                                                 | ED visit                                                   | 4 weeks before transition | Arm 1 – 24 (3.1)<br>Arm 2 – 2 (1.2)<br>Arm 3 – 7 (0.9)                                                                                                                                                                                                                                           | Ref: Arm 1, p=0.0031                                                         | No                                                                     |
| Walker, 2023(71)         | 2c            | Arm 1 – In-person (20,666)<br>Arm 2 – Telehealth (10,988)                                                                                                                                                                                                   | ED visits                                                  | NR                        | Arm 1 – NR (0.42)<br>Arm 2 – NR (0.338)                                                                                                                                                                                                                                                          | Ref: Arm 1 Likelihood of ED visit: -0.003 (95% CI: -0.011 to 0.004), p=0.351 | Baseline characteristic, facility fixed effect                         |
| Watson, 2021(72)         | 2c            | Arm 1 – Pre- telephone clinic (face to face) (814)<br>Arm 2 – Post- introduction (telephone) (910)                                                                                                                                                          | Presentations (excluding hospitalization) within 24- hours | 24 hours                  | Arm 1 – 3 (0.37)<br>Arm 2 – 4 (0.44)                                                                                                                                                                                                                                                             | Ref: Arm 1, p=1                                                              | No                                                                     |
|                          |               | Arm 1 – Pre- telephone clinic (face to face) (814)<br>Arm 2 – Post- introduction (telephone) (910)                                                                                                                                                          | Presentations (excluding hospitalization) within 7 days    | 7 days                    | Arm 1 – 3 (0.37)<br>Arm 2 – 7 (0.77)                                                                                                                                                                                                                                                             | Ref: Arm 1, p=0.343                                                          | No                                                                     |

1a=general medical care, adults; 1b=general medical care, children; 1c=general medical care, all ages; 2s=specialized care, COVI-19; 2b=specialized care, pregnancy/prenatal/gynecological; 2c=specialized care, other; 3=general behavioral/mental health. CI=confidence interval; ED=emergency department; N=sample size; NR=not reported; OR=odds ratio; p=p-value; Ref=reference.

**Supplementary Table 4-B. Study Results Investigating the Effectiveness of Telehealth vs. In-person Care by Outcome Category and Clinical Area – Healthcare Utilization, Hospitalization.**

| Author, Year      | Clinical Area | Arm Definition (n)                                                                                                                       | Outcome             | Time of Analysis | Participants With Outcomes, n (%) | Comparison                                                  | Adjusted                                        |
|-------------------|---------------|------------------------------------------------------------------------------------------------------------------------------------------|---------------------|------------------|-----------------------------------|-------------------------------------------------------------|-------------------------------------------------|
| Ryskina, 2021(60) | 1a            | Arm 1 - Patients having in-person primary care appointment (6792)<br>Arm 2 - Patients having telehealth primary care appointment (10311) | Any Hospitalization | NR               | NR                                | Ref: Arm 1, Odds ratio: 0.72 (95% CI: 0.57 to 0.9), p=0.004 | Age, sex, race, ethnicity, and the weighted CCI |

| Author, Year              | Clinical Area | Arm Definition (n)                                                                                                                                                                                    | Outcome                                               | Time of Analysis | Participants With Outcomes, n (%)                          | Comparison                                                         | Adjusted                                                                                   |
|---------------------------|---------------|-------------------------------------------------------------------------------------------------------------------------------------------------------------------------------------------------------|-------------------------------------------------------|------------------|------------------------------------------------------------|--------------------------------------------------------------------|--------------------------------------------------------------------------------------------|
| Zimmerman, 2021(77)       | 1a            | Arm 1 - In-person (207)<br>Arm 2 - Telehealth (207)                                                                                                                                                   | Transfer to in-patient care                           | NR               | Arm 1 - Events: 7.038 (3.4)<br>Arm 2 - Events: 2.898 (1.4) | p=NS                                                               | No                                                                                         |
| Shah, 2022(63)            | 1a            | Arm 1 - In-person ED visits (11,818)<br>Arm 2 - Telehealth ED visits (5,169)                                                                                                                          | Hospitalization after ED visit                        | 30 days          | Arm 1 - Events: 438 (0.04)<br>Arm 2 - Events: 238 (0.05)   | Ref: Arm 1<br>Odds ratio: 1.31 (95% CI: 1.09 to 1.58), p=0.007     | Sociodemographic and clinical factors, time from ED discharge to follow-up                 |
| Hatef, 2022(28)           | 1c            | Arm 1 - First encounter in-person (493,716)<br>Arm 2 - First encounter telemedicine (113,857)                                                                                                         | Acute ambulatory care, Hospitalization on follow-up   | 14 days          | NR (NR)                                                    | Ref: Arm 1<br>Odds ratio: 1.03 (95% CI: 0.98 to 1.08), p=NR        | Type of acute and chronic ambulatory care sensitive conditions treated during the episode. |
|                           |               | Arm 1 - First encounter in-person (410,743)<br>Arm 2 - First encounter telemedicine (94,481)                                                                                                          | Chronic ambulatory care, Hospitalization on follow-up | 14 days          | NR (NR)                                                    | Ref: Arm 1<br>Odds ratio: 0.94 (95% CI: 0.9 to 0.99), p=NR         | Type of acute and chronic ambulatory care sensitive conditions treated during the episode. |
| Phillips, 2021(52)        | 1c            | Arm 1 - Individuals presenting to initial in-person visit at Respiratory Assessment center (741)<br>Arm 2 - Individuals presenting to initial telehealth visit at Respiratory Assessment Center (564) | Hospital admission                                    | 14 Days          | Arm 1 - 21 (2.8)<br>Arm 2 - 11 (2)                         | Ref: Arm 1<br>Chi-squared: NR, p=0.307                             | No                                                                                         |
| Casariego-Vales, 2021(12) | 2a            | Arm 1 - Primary Care Monitoring (3197)<br>Arm 2 - TELEA Telehealth Monitoring (1187)                                                                                                                  | Hospitalization                                       | 68 days          | Arm 1 - 65 (2)<br>Arm 2 - 184 (NR)                         | Ref: Arm 1,<br>Assumed t-test/man Whitney: NR, p≤.0001             | No                                                                                         |
|                           |               |                                                                                                                                                                                                       | Hospitalization after ED visit                        | 68 days          | Arm 1 - 65 (28.6)<br>Arm 2 - 184 (NR)                      | Ref: Arm 1,<br>Assumed t-test/man Whitney: NR, p≤.0001             | No                                                                                         |
| Korycinski, 2022 (36)     | 2a            | Arm 1 - Control (154)<br>Arm 2 - Telephone based intervention (139)                                                                                                                                   | Hospital admission                                    | 30 days          | Arm 1 - 10 (6.5)<br>Arm 2 - 6 (4.3)                        | Ref: Arm 1,<br>Hazard ratio: 0.578 (95% CI: 0.29 to 1.13), p=0.452 | No                                                                                         |
| Arias, 2022(5)            | 2b            | Arm 1 - Pre-telehealth Implementation (780)<br>Arm 2 - Post-telehealth Implementation (799)                                                                                                           | Intensive care nursery                                | NR               | Arm 1 - 102 (13.1)<br>Arm 2 - 115 (14.4)                   | Ref: Arm 1<br>p=0.45                                               | No                                                                                         |
| Duryea, 2021(19)          | 2b            | Arm 1 - Pregnant individuals who received in-person prenatal Care (6,559)<br>Arm 2 - Pregnant individuals who received audio telehealth and in-person prenatal care (6,048)                           | Full Term NICU Admission                              | 183 Days         | Arm 1 - 98 (1.5)<br>Arm 2 - 94 (1.6)                       | Ref: Arm 1<br>Relative risk: 1.03 (95% CI: 0.78 to 1.36), p=0.78   | BMI at delivery, race                                                                      |

| Author, Year             | Clinical Area | Arm Definition (n)                                                                                                                                                                                                                                          | Outcome                                                              | Time of Analysis | Participants With Outcomes, n (%)                                                                                                                                                                                                                                                                  | Comparison                                                                               | Adjusted                                                               |
|--------------------------|---------------|-------------------------------------------------------------------------------------------------------------------------------------------------------------------------------------------------------------------------------------------------------------|----------------------------------------------------------------------|------------------|----------------------------------------------------------------------------------------------------------------------------------------------------------------------------------------------------------------------------------------------------------------------------------------------------|------------------------------------------------------------------------------------------|------------------------------------------------------------------------|
| Afonso Nogueira, 2021(3) | 2c            | Arm 1 - Individuals with heart failure attending outpatient cardiology appointments (Pre-COVID) (160)<br>Arm 2 - Individuals with heart failure attending outpatient cardiology appointments (43)                                                           | Hospitalized for Heart Failure                                       | 497 days         | Arm 1 - 71 (44.4)<br>Arm 2 - 11 (25.6)                                                                                                                                                                                                                                                             | Ref: Arm 1, Chi-squared: NR, p=0.83                                                      | No                                                                     |
| Cvietusa, 2022(17)       | 2c            | Arm 1 - No asthma care (Baseline: NR, Follow-up: 2,977)<br>Arm 2 - In-person only (Baseline: NR, Follow-up: 1,792)<br>Arm 3 - Mixed (in- person and virtual) (Baseline: NR, Follow-up: 1,084)<br>Arm 4 - Virtual care only (Baseline: NR, Follow-up: 1,952) | Hospitalization                                                      | NR               | Arm 1 - Continuous data<br>Baseline: NR Follow-up: Mean: 0 (SE 0)<br>Arm 2 - Continuous data<br>Baseline: NR Follow-up: Mean: <0.001 (SE 0.062)<br>Arm 3 - Continuous data<br>Baseline: NR Follow-up: Mean: <0.001 (SE 0.291)<br>Arm 4 - Continuous data<br>Baseline: NR Follow-up: Mean: 0 (SE 0) | Ref: Arm 1, p=0.034 (for all comparisons)                                                | Age, sex, race, baseline value of outcome, person-year, overdispersion |
| D'Anna, 2021(18)         | 2c            | Arm 1 - In-person (2019) (180)<br>Arm 2 - Telephone (2020) (136)                                                                                                                                                                                            | Admission to hospital for recurrent transient ischemic attack/stroke | 3 months         | Arm 1 - 3 (1.67)<br>Arm 2 - 2 (1.47)                                                                                                                                                                                                                                                               | Ref: Arm1, p=0.445                                                                       | No                                                                     |
| Ostberg, 2022(50)        | 2c            | Arm 1 - In-person (2019) (455)<br>Arm 2 - Telehealth/zoom (2020) (455)                                                                                                                                                                                      | Admit to in- patient                                                 | NR               | Arm 1 - 27 (5.9)<br>Arm 2 - 29 (6.4)                                                                                                                                                                                                                                                               | Ref: Arm1, p=0.054                                                                       | No                                                                     |
| Severino, 2022(61)       | 2c            | Arm 1 - Telehealth (92)<br>Arm 2 - In-person (92)                                                                                                                                                                                                           | Cardiovascular hospitalization                                       | 12 months        | Arm 1 - 14 (0.152)<br>Arm 2 - 19 (0.207)                                                                                                                                                                                                                                                           | Ref: Arm 1 (telehealth) Hazard ratio: 1.34 (95% CI: 0.67 to 2.68), p=0.4                 | Age, gender, clinical characteristics, echocardiographic parameters    |
| Sevilis, 2022(62)        | 2c            | Arm 1: Pre- COVID (15,226)<br>Arm 2: COVID (11,105)                                                                                                                                                                                                         | Inpatient thrombolytics                                              | 24 hours         | Arm 1 - 66 (4)<br>Arm 2 - 70 (5.7)                                                                                                                                                                                                                                                                 | Ref: Arm1, p=0.033                                                                       | No                                                                     |
| Sharma, 2020(64)         | 2c            | Arm 1: IBD Services before COVID (2019) (1,036)<br>Arm 2: IBD Services after COVID (2020) (334)                                                                                                                                                             | Inpatient Contact                                                    | NR               | Arm 1 - Events: 17 (1.6)<br>Arm 2 - Events: 3 (0.9)                                                                                                                                                                                                                                                | Ref: Arm 1, % change from baseline: -0.82, p=NR                                          | No                                                                     |
| Walker, 2023(71)         | 2c            | Arm 1 - In-person (20,666)<br>Arm 2 - Telehealth (10,988)                                                                                                                                                                                                   | In-patient admission                                                 | NR               | Arm 1 - NR (0.265)<br>Arm 2 - NR (0.228)                                                                                                                                                                                                                                                           | Ref: Arm 1 Likelihood of in-patient admission: 0.024 (95% CI: -0.018 to 0.031), p=<0.001 | Baseline characteristic, facility fixed effect                         |
| Watson, 2021(72)         | 2c            | Arm 1 - Pre- telephone clinic (face to face) (814)<br>Arm 2 - Post- introduction (telephone) (910)                                                                                                                                                          | Hospitalization within 24-hours                                      | 24 hours         | Arm 1 - 18 (2.21)<br>Arm 2 - 22 (2.42)                                                                                                                                                                                                                                                             | Ref: Arm 1, p=0.531                                                                      | No                                                                     |
| Zhao, 2021(75)           | 2c            | Arm 1 - Individuals with heart failure attending in-person outpatient appointment (39)<br>Arm 2 - Individuals with heart failure attending telehealth appointments (43)                                                                                     | Hospitalization for Heart Failure                                    | 66-82 days       | Arm 1 - 0 (NR)<br>Arm 2 - 2 (NR)                                                                                                                                                                                                                                                                   | NR                                                                                       | No                                                                     |



| Author, Year                                                                                                                                                                                                                                                                                                                                                                                                                                                                                                               | Clinical Area | Arm Definition (n)                                                   | Outcome                        | Time of Analysis | Participants With Outcomes, n (%)    | Comparison                                                               | Adjusted |
|----------------------------------------------------------------------------------------------------------------------------------------------------------------------------------------------------------------------------------------------------------------------------------------------------------------------------------------------------------------------------------------------------------------------------------------------------------------------------------------------------------------------------|---------------|----------------------------------------------------------------------|--------------------------------|------------------|--------------------------------------|--------------------------------------------------------------------------|----------|
| Zhu, 2021(76)                                                                                                                                                                                                                                                                                                                                                                                                                                                                                                              | 2c            | Arm 1 - In-person (2019) (1,286)<br>Arm 2 - Telephone (2020) (1,493) | Planned Admission or Procedure | NR               | Arm 1 - 33 (2.6)<br>Arm 2 - 15 (1)   | Ref: Arm 1<br>Odds ratio:<br>0.38 (95% CI:<br>0.208 to 0.71),<br>p=0.002 | No       |
|                                                                                                                                                                                                                                                                                                                                                                                                                                                                                                                            |               |                                                                      | Unplanned admission            | NR               | Arm 1 - 53 (4.1)<br>Arm 2 - 39 (2.6) | Ref: Arm 1<br>Odds ratio:<br>0.62 (95% CI:<br>0.41 to 0.95),<br>p=0.027  | No       |
| 1a=general medical care, adults; 1b=general medical care, children; 1c=general medical care, all ages; 2s=specialized care, COVID-19; 2b=specialized care, pregnancy/prenatal/gynecological; 2c=specialized care, other; 3=general behavioral/mental health. ACSC= ambulatory care sensitive conditions; CCI= Charlson Comorbidity Index; CI=confidence interval; ED=emergency department; N=sample size; NICU=neonatal intensive care unit; NR=not reported; NS=non-significant; OR=odds ratio; p=p-value; Ref=reference. |               |                                                                      |                                |                  |                                      |                                                                          |          |

**Supplementary Table 4-C. Study Results Investigating the Effectiveness of Telehealth vs. In-person Care by Outcome Category and Clinical Area – Healthcare Utilization, Readmission.**

| Author, Year                                                                                                                                                                                                                                                                                                                                                  | Clinical Area | Arm Definition (n)                                                                                                                                                                                    | Outcome                                                     | Time of Analysis | Participants With Outcomes, n (%)       | Comparison                                                      | Adjusted |
|---------------------------------------------------------------------------------------------------------------------------------------------------------------------------------------------------------------------------------------------------------------------------------------------------------------------------------------------------------------|---------------|-------------------------------------------------------------------------------------------------------------------------------------------------------------------------------------------------------|-------------------------------------------------------------|------------------|-----------------------------------------|-----------------------------------------------------------------|----------|
| Borgen, 2021(8)                                                                                                                                                                                                                                                                                                                                               | 2a            | Arm 1 - Individuals with new COVID-19 not receiving telehealth care management discharged from the hospital (593)<br>Arm 2 - Individuals with new COVID-19 receiving telehealth care management (114) | Hospital Readmission                                        | 30 days          | Arm 1 - 26 (4.4)<br>Arm 2 - 4 (3.5)     | Ref: Arm 1,<br>Chi-squared test of independence: 0.18,<br>p=0.6 | No       |
| Carlberg, 2020(11)                                                                                                                                                                                                                                                                                                                                            | 2a            | Arm 1 - Patients receiving telehealth and in- person evaluation in the ED (132)<br>Arm 2 - Patients receiving telehealth only evaluation in the ED (153)                                              | Admitted upon return, within 72 hours, COVID-19 related     | 72 hours         | Arm 1 - 1 (8)<br>Arm 2 - 0 (0)          | NR                                                              | No       |
|                                                                                                                                                                                                                                                                                                                                                               |               |                                                                                                                                                                                                       | Admitted upon return, Within 72 hours, Non-COVID-19 related | 72 hours         | Arm 1 - 0 (0)<br>Arm 2 - 0 (0)          | NR                                                              | No       |
| Khosla, 2022(33)                                                                                                                                                                                                                                                                                                                                              | 2b            | Arm 1 - Pre- pandemic (215)<br>Arm 2 – Post-pandemic (258)                                                                                                                                            | Readmission                                                 | 6 weeks          | Arm 1 - 38 (17.8)<br>Arm 2 - 45 (17.4)  | Ref: Arm 1,<br>p=0.91                                           | No       |
| Hughes, 2022(29)                                                                                                                                                                                                                                                                                                                                              | 2c            | Arm 1 – In-person follow-up (NR)<br>Arm 2 – Telehealth follow-up (146)                                                                                                                                | Readmission                                                 | 30 days          | Arm 1 - 6 (0.171)<br>Arm 2 - 20 (0.137) | NR                                                              | No       |
| 1a=general medical care, adults; 1b=general medical care, children; 1c=general medical care, all ages; 2a=specialized care, COVID-19; 2b=specialized care, pregnancy/prenatal/gynecological; 2c=specialized care, other; 3=general behavioral/mental health. CI=confidence interval; N=sample size; NR=not reported; OR=odds ratio; p=p-value; Ref=reference. |               |                                                                                                                                                                                                       |                                                             |                  |                                         |                                                                 |          |

**Supplementary Table 5-A. Study Results Investigating the Effectiveness of Telehealth vs. In-person Care by Outcome Category and Clinical Area – Clinical Outcomes, Mortality.**

| Author, Year             | Clinical Area | Arm Definition (n)                                                                                                                                                                                | Outcome                                  | Time of Analysis                   | Participants With Outcomes, n (%)       | Comparison                                                                   | Adjusted                                                                                                                          |
|--------------------------|---------------|---------------------------------------------------------------------------------------------------------------------------------------------------------------------------------------------------|------------------------------------------|------------------------------------|-----------------------------------------|------------------------------------------------------------------------------|-----------------------------------------------------------------------------------------------------------------------------------|
| Aiken, 2021(4)           | 2b            | Arm 1 - Individuals receiving medical abortion following in-person visit (22,158)<br>Arm 2 - Individuals receiving medical abortion following telemedicine/hybrid visit (29,984)                  | Adverse Effect: Death                    | 59 days (Arm 1)<br>85 days (Arm 2) | Arm 1 - 0 (0)<br>Arm 2 - 0 (0)          | Ref: Arm 1<br>Covariate adjusted test of difference or proportions: NR, p=NR | Patient age, race/ethnicity, gestational age, parity and prior abortions using logistic regression and weighted risk differences. |
| Arias, 2022(5)           | 2b            | Arm 1 - Pre-telehealth implementation (780)<br>Arm 2 - Post-telehealth implementation (799)                                                                                                       | Fetal death                              | NR                                 | Arm 1 - 11 (1.4)<br>Arm 2 - 13 (1.6)    | Ref: Arm 1, p=0.72                                                           | No                                                                                                                                |
| Afonso Nogueira, 2021(3) | 2c            | Arm 1 - Individuals with heart failure attending outpatient cardiology appointments (Pre-COVID) (160)<br>Arm 2 - Individuals with heart failure attending outpatient cardiology appointments (43) | Mortality                                | 497 days                           | Arm 1 - 20 (12.5)<br>Arm 2 - 1 (2.3)    | Ref: Arm 1<br>Test of real vs estimated mortality: NR, p=NR                  | No                                                                                                                                |
| Severino, 2022(61)       | 2c            | Arm 1 – Telehealth (92)<br>Arm 2 - In-person (92)                                                                                                                                                 | Mortality                                | 12 months                          | Arm 1 - 10 (0.109)<br>Arm 2 - 11 (0.12) | Ref: Arm 1 (telehealth)<br>Hazard ratio: 1.09 (95% CI: 0.46 to 2.56), p=0.4  | Age, gender, clinical characteristics, echocardiographic parameters                                                               |
| Watson, 2021(72)         | 2c            | Arm 1 - Pre- telephone clinic (face to face) (814)<br>Arm 2 - Post- introduction (telephone) (910)                                                                                                | 30-day mortality post systemic therapy   | 30 days                            | Arm 1 - 7 (0.86)<br>Arm 2 - 0 (0)       | Ref: Arm 1, p=0.008                                                          | No                                                                                                                                |
| Zhao, 2021(75)           | 2c            | Arm 1 - Individuals with heart failure attending in-person outpatient appointment (39)<br>Arm 2 - Individuals with heart failure attending telehealth appointments (43)                           | Mortality and Major Cardiovascular Event | 66-82 days                         | Arm 1 - NR (5.1)<br>Arm 2 - NR (2.33)   | Ref: Arm 1<br>Assumed Chi-squared: NR, p=0.6                                 | No                                                                                                                                |

1a=general medical care, adults; 1b=general medical care, children; 1c=general medical care, all ages; 2a=specialized care, COVID-19; 2b=specialized care, pregnancy/prenatal/gynecological; 2c=specialized care, other; 3=general behavioral/mental health. CI=confidence interval; N=sample size; NR=not reported; OR=odds ratio; p=p-value; Ref=reference.

**Supplementary Table 5-B. Study Results Investigating the Effectiveness of Telehealth vs. In-person Care by Outcome Category and Clinical Area – Clinical Outcomes, Patient-Reported Outcomes.**

| Author, Year     | Clinical Area | Arm Definition (n)                                                                          | Outcome                                                                                                  | Time of Analysis | Participants With Outcomes, n (%)        | Comparison                                                               | Adjusted                                                               |
|------------------|---------------|---------------------------------------------------------------------------------------------|----------------------------------------------------------------------------------------------------------|------------------|------------------------------------------|--------------------------------------------------------------------------|------------------------------------------------------------------------|
| Arias, 2022(5)   | 2b            | Arm 1 - Pre-telehealth Implementation (780)<br>Arm 2 - Post-telehealth Implementation (799) | Postpartum depression screening                                                                          | NR               | Arm 1 - 368 (65.1)<br>Arm 2 - 571 (86.3) | Ref: Arm 1<br>Odds ratio: 4.61 (95% CI: 3.38 to 6.28), p<0.001           | Prenatal care provider only                                            |
| Bryson, 2023(10) | 2b            | Arm 1 - Telehealth (156)<br>Arm 2 - In-person (270)                                         | Follow-up for Long acting reversible contraceptive; any symptom reported (pelvic pain, uterine bleeding, | NR               | Arm 1 - 87 (55.8)<br>Arm 2 - 123 (45.6)  | Ref: Arm 1 (telehealth)<br>Odds ratio: 1.4 (95% CI: 0.94 to 2.1), p=0.04 | Patient age at the time of insertion, presence of menstrual or medical |

| Author, Year        | Clinical Area | Arm Definition (n)                                                      | Outcome                                                  | Time of Analysis                 | Participants With Outcomes, n (%)                                                                                                                                                           | Comparison                           | Adjusted                                                                                                                            |
|---------------------|---------------|-------------------------------------------------------------------------|----------------------------------------------------------|----------------------------------|---------------------------------------------------------------------------------------------------------------------------------------------------------------------------------------------|--------------------------------------|-------------------------------------------------------------------------------------------------------------------------------------|
|                     |               |                                                                         | dysmenorrhea, acne, weight change, mental health change) |                                  |                                                                                                                                                                                             |                                      | diagnoses at insertion, reason for long-acting reversible contraception (LARC), type of LARC device, and timing of follow-up visit. |
| Minsky, 2021(47)    | 2c            | Arm 1 - Not using telemedicine (228)<br>Arm 2 - Using telemedicine (51) | Deterioration in dietary habit score                     | NR                               | Arm 1 - 97 (42.54)<br>Arm 2 - 17 (33.33)                                                                                                                                                    | NR                                   | No                                                                                                                                  |
| Kablinger, 2022(31) | 3             | Arm 1 – Pre-pandemic (196)<br>Arm 2 – Post-pandemic (196)               | BASE-6                                                   | NR                               | Arm 1 -Continuous data<br>Baseline: NR<br>Follow-up: Mean: 23.91 (NR)<br>Arm 2 - Arm 1 -<br>Continuous data Baseline:<br>NR<br>Follow-up: Mean: 21.01 (NR)                                  | Ref: Arm 1<br>Difference:<br>p=<0.00 | No                                                                                                                                  |
|                     |               | Arm 1 – Pre-pandemic (199)<br>Arm 2 – Post-pandemic (199)               | GAD-7                                                    | NR                               | Arm 1 - Continuous data<br>Baseline: NR<br>Follow-up: Mean: 10.55 (NR)<br>Arm 2 - Continuous data<br>Baseline: NR<br>Follow-up:<br>Mean: 8.39 (NR)                                          | Ref: Arm 1<br>Difference:<br>p=<0.00 | No                                                                                                                                  |
|                     |               | Arm 1 – Pre-pandemic (176)<br>Arm 2 – Post-pandemic (176)               | PHQ-9                                                    | NR                               | Arm 1- Continuous data<br>Baseline: NR<br>Follow-up: Mean: 11.88 (NR)<br>Arm 2 - Continuous data<br>Baseline: NR<br>Follow-up: Mean: 9.7 (NR)                                               | Ref: Arm 1<br>Difference:<br>p=0.00  | No                                                                                                                                  |
| Levinson, 2021(37)  | 3             | Arm 1 – In-person (60)<br>Arm 2 – Telehealth, zoom (33)                 | Eating Disorder Examination Questionnaire v4 (EDE-Q-IV)  | Mean stay: 11.32 weeks Discharge | Arm 1 - Continuous data<br>Baseline: Mean: 4.1 (SD 1.07)<br>Follow-up: Mean: 2.73 (SD 1.24)<br>Arm 2 - Continuous data<br>Baseline: Mean: 3.56 (SD 1.42)<br>Follow-up: Mean: 2.56 (SD 1.14) | Ref: Arm 1<br>p=NS                   | No                                                                                                                                  |
|                     |               |                                                                         | Beck Depression Inventory II (BDI-II)                    | Mean stay: 11.32 weeks Discharge | Arm 1 - Continuous data<br>Baseline: Mean: 31.2 (SD 11.64)<br>Follow-up: Mean: 23.37 (SD 14.42)<br>Arm 2 - Continuous data                                                                  | Ref: Arm 1<br>p=NS                   | No                                                                                                                                  |

| Author, Year    | Clinical Area | Arm Definition (n)                                                                                    | Outcome                                                      | Time of Analysis | Participants With Outcomes, n (%)                                                                                                                                                      | Comparison                                                               | Adjusted                                        |
|-----------------|---------------|-------------------------------------------------------------------------------------------------------|--------------------------------------------------------------|------------------|----------------------------------------------------------------------------------------------------------------------------------------------------------------------------------------|--------------------------------------------------------------------------|-------------------------------------------------|
|                 |               |                                                                                                       |                                                              |                  | Baseline: Mean: 26.16 (SD 12.62)<br>Follow-up: Mean: 20.13 (SD 11.8)                                                                                                                   |                                                                          |                                                 |
| Liou, 2022(40)  | 3             | Arm 1 – In-person (Baseline: 242, Follow-up: 217)<br>Arm 2 – Telehealth (Baseline: 25, Follow-up: 15) | Patient Health Questionnaire-9 (PHQ-9)                       | NR               | NR                                                                                                                                                                                     | Ref: Arm 1 Mean change from baseline: 0.26 (95% CI: -2.66 to 3.18), p=NR | Total number of sessions, PTSD, grief, and pain |
|                 |               |                                                                                                       | General Anxiety Disorder-7 (GAD-7)                           | NR               | NR                                                                                                                                                                                     | Ref: Arm 1 Mean change from baseline: 0.16 (95% CI: -2.34 to 2.67), p=NR | Total number of sessions, PTSD, grief, and pain |
| Rene, 2022(57)  | 3             | Arm 1 – In-person (157)<br>Arm 2 – Telehealth (181)                                                   | Depression severity (PHQ-9)                                  | NR               | Arm 1 - Continuous data<br>Baseline: Mean: 11.5 (SD 6.4)<br>Follow-up: Mean: 8.7 (SD 6.3)<br>Arm 2 - Continuous data<br>Baseline: Mean: 11.8 (SD 5.7)<br>Follow-up: Mean: 8.9 (SD 6.2) | Ref: Arm 1 p=<0.001                                                      | Treatment cohort, age, sex, race, initial score |
|                 |               |                                                                                                       | Anxiety severity (GAD-7)                                     | NR               | Arm 1 - Continuous data<br>Baseline: Mean: 11 (SD 4.9)<br>Follow-up: Mean: 8.7 (SD 5.5)<br>Arm 2 - Continuous data<br>Baseline: Mean: 12.9 (SD 4.9)<br>Follow-up: Mean: 9.8 (SD 5.6)   | Ref: Arm 1 p=<0.001                                                      | Treatment cohort, age, sex, race, initial score |
| Zayde, 2021(74) | 3             | Arm 1 – Pre-pandemic (12)<br>Arm 2 – Post-pandemic (12)                                               | Patient Health Questionnaire–9 score                         | 20 Weeks         | Arm 1 - Continuous data<br>Baseline: Mean: 7.8 (SD 5.96)<br>Arm 2 - Follow-up: Mean: 3.1 (SD 2.02)                                                                                     | Cohen's d: -0.75 (95% CI: -0.62 to 8.78), p=NR                           | No                                              |
|                 |               |                                                                                                       | Generalized Anxiety Disorder Scale–7 score (before vs after) | 20 Weeks         | Arm 1 - Continuous data<br>Baseline: Mean: 8.2 (SD 5.47)<br>Arm 2 - Follow-up: Mean: 2.8 (SD 1.75)                                                                                     | Cohen's d: -0.94 (95% CI: 2.23 to 8.57), p=NR                            | No                                              |

1a=general medical care, adults; 1b=general medical care, children; 1c=general medical care, all ages; 2a=specialized care, COVID-19; 2b=specialized care, pregnancy/prenatal/gynecological; 2c=specialized care, other; 3=general behavioral/mental health. BASE-6= Brief adjustment scale-6; BDI-II= Beck Depression Inventory II; CI=confidence interval; EDE-Q-IV= Eating Disorder Examination Questionnaire version 4; GAD-7= Generalized anxiety disorder-7; N=sample size; NR=not reported; NS=non-significant; p=p-value; PHQ-9= The patient health questionnaire -9; Ref=reference; SD=standard deviation

**Supplementary Table 5-C. Study Results Investigating the Effectiveness of Telehealth vs. In-person Care by Outcome Category and Clinical Area – Clinical Outcomes, Condition Specific Outcomes.**

| Author, Year        | Clinical Area | Arm Definition (n)                                                                                                                                                               | Outcome                                                                                                                     | Time of Analysis                   | Participants With Outcomes, n (%)                                                                 | Comparison                                                                  | Adjusted                                                                                                                                                            |
|---------------------|---------------|----------------------------------------------------------------------------------------------------------------------------------------------------------------------------------|-----------------------------------------------------------------------------------------------------------------------------|------------------------------------|---------------------------------------------------------------------------------------------------|-----------------------------------------------------------------------------|---------------------------------------------------------------------------------------------------------------------------------------------------------------------|
| Griebeler, 2022(27) | 1a            | Arm 1 - In-person (35)<br>Arm 2 - Telehealth (35)                                                                                                                                | 5% weight change                                                                                                            | 12 weeks                           | Arm 1 - (70.5)<br>Arm 2 - (64.7)                                                                  | Ref: Arm 1<br>Odds ratio: 0.9<br>(95% CI: 0.6 to 1.3), p=NR                 | No                                                                                                                                                                  |
| Aiken, 2021(4)      | 2b            | Arm 1 - Individuals receiving medical abortion following in-person visit (22,158)<br>Arm 2 - Individuals receiving medical abortion following telemedicine/hybrid visit (29,984) | Successful Medical Abortion                                                                                                 | 59 days (Arm 1)<br>85 days (Arm 2) | Arm 1 – 21,769<br>(0.982)<br>Arm 2 – 29,618<br>(0.988)                                            | Ref: Arm 1<br>Covariate adjusted test of difference or proportions: NR, p=1 | Patient age, race/ethnicity, gestational age, parity and prior abortions using logistic regression and weighted risk differences.                                   |
| Arias, 2022(5)      | 2b            | Arm 1 - Pre-telehealth implementation (780) Arm 2 - Post-telehealth implementation (799)                                                                                         | Any breastfeeding at postpartum visit                                                                                       | NR                                 | Arm 1 - 420 (75.3)<br>Arm 2 - 473 (72.3)                                                          | Ref: Arm 1,<br>Odds ratio: 0.09<br>(95% CI: 0.68 to 1.18), p=0.25           | No                                                                                                                                                                  |
| Clark, 2022(14)     | 2b            | Arm 1 - In-person (208)<br>Arm 2 - Telehealth (295)                                                                                                                              | C-section                                                                                                                   | NR                                 | Arm 1 - 110 (52.8)<br>Arm 2 - 157 (53.2)                                                          | Ref: Arm 1,<br>p=0.941                                                      | No                                                                                                                                                                  |
|                     |               |                                                                                                                                                                                  | NICU admission                                                                                                              |                                    | Arm 1 - 38 (18.3)<br>Arm 2 - 68 (23)                                                              | Ref: Arm 1<br>p=0.296                                                       | No                                                                                                                                                                  |
| Gao, 2022(25)       | 2b            | Arm 1 - In-person (938)<br>Arm 2 - Telehealth (938)                                                                                                                              | Pre-term birth <37 weeks                                                                                                    | 37 weeks                           | Arm 1 - 127 (13.5)<br>Arm 2 – 153 (16.3)                                                          | Ref: Arm 1,<br>p=0.76                                                       | Matched on age, race, ethnicity, and prenatal conditions, including hypertensive disorder, gestational diabetes, and infections of genitourinary tract in pregnancy |
| Barequet, 2021(6)   | 2c            | Arm 1 - In-person/Office (NR)<br>Arm 2 - Telehealth (204)                                                                                                                        | Diagnostic accuracy and reliability for detecting keratoconus patients' progression - Specificity between office and remote | NR                                 | Arm 1 - Continuous data<br>Baseline: NR<br>Arm 2 - Follow-up:<br>Specificity:<br>95.8 (95% CI NR) | NR                                                                          | No                                                                                                                                                                  |
|                     |               |                                                                                                                                                                                  | Diagnostic accuracy and reliability -                                                                                       | NR                                 | Arm 1 - Continuous data<br>Baseline: NR<br>Arm 2 - Follow-up:                                     | NR                                                                          | No                                                                                                                                                                  |

| Author, Year       | Clinical Area | Arm Definition (n)                                                                                                                                                                                                                                          | Outcome                                                                                   | Time of Analysis | Participants With Outcomes, n (%)                                                                                                                                                                                                                                                                                            | Comparison                                                                            | Adjusted                                                                     |
|--------------------|---------------|-------------------------------------------------------------------------------------------------------------------------------------------------------------------------------------------------------------------------------------------------------------|-------------------------------------------------------------------------------------------|------------------|------------------------------------------------------------------------------------------------------------------------------------------------------------------------------------------------------------------------------------------------------------------------------------------------------------------------------|---------------------------------------------------------------------------------------|------------------------------------------------------------------------------|
|                    |               |                                                                                                                                                                                                                                                             | Sensitivity between office and remote                                                     |                  | Sensitivity: 69.2 (95% CI NR)                                                                                                                                                                                                                                                                                                |                                                                                       |                                                                              |
|                    |               |                                                                                                                                                                                                                                                             | Diagnostic accuracy and reliability - Positive predictive value between office and remote | NR               | Arm 1 - Continuous data<br>Baseline: NR<br>Arm 2 - Follow-up: 52.9 (95% CI NR)                                                                                                                                                                                                                                               | NR                                                                                    | No                                                                           |
|                    |               |                                                                                                                                                                                                                                                             | Diagnostic accuracy and reliability - Negative predictive value between office and remote | NR               | Arm 1 - Continuous data<br>Baseline: NR<br>Arm 2 - Follow-up: 97.9 (95% CI NR)                                                                                                                                                                                                                                               | NR                                                                                    | No                                                                           |
| Cvietusa, 2022(17) | 2c            | Arm 1 - No asthma care (Baseline: NR, Follow-up: 2,977)<br>Arm 2 - In-person only (Baseline: NR, Follow-up: 1,792)<br>Arm 3 - Mixed (in- person and virtual) (Baseline: NR, Follow-up: 1,084)<br>Arm 4 - Virtual care only (Baseline: NR, Follow-up: 1,952) | Asthma exacerbations                                                                      | NR               | Arm 1 - Continuous data<br>Baseline: NR<br>Follow-up: Mean: 0.013 (SE 0.003)<br>Arm 2 – Continuous data<br>Baseline: NR<br>Follow-up: Mean: 0.127 (SE 0.015)<br>Arm 3 - Continuous data<br>Baseline: NR<br>Follow-up: Mean: 0.537 (SE 0.055)<br>Arm 4 - Continuous data<br>Baseline: NR<br>Follow-up: Mean: 0.161 (SE 0.018) | Ref: Arm 1, p=<0.001 (for all comparisons)                                            | No                                                                           |
| Fredwall, 2021(21) | 2c            | Arm 1 - Patients seen in- person at Epilepsy Clinic (101)<br>Arm 2 - Patients seen by telemedicine at Epilepsy Clinic (16)                                                                                                                                  | In remission or had improvements, 1 month                                                 | 1 month          | Arm 1 - NR (0.7)<br>Arm 2 - 14 (0.88)                                                                                                                                                                                                                                                                                        | NR                                                                                    | No                                                                           |
|                    |               |                                                                                                                                                                                                                                                             | In remission or had improvements, 3 months                                                | 3 months         | Arm 1 - NR (0.75)<br>Arm 2 - 14 (0.88)                                                                                                                                                                                                                                                                                       | NR                                                                                    | No                                                                           |
| Mair, 2021(42)     | 2c            | Arm 1 - Pre-COVID (2019) (210)<br>Arm 2 - Tele-rheumatology (340)                                                                                                                                                                                           | Disease in remission                                                                      | NR               | Arm 1 - 162 (77.1)<br>Arm 2 - 291 (85.6)                                                                                                                                                                                                                                                                                     | Ref: Arm1<br>Difference in proportion : 0.08 (95% CI: 0.02 to 0.15),<br>p=Significant | NR                                                                           |
| Minsky, 2021(47)   | 2c            | Arm 1 - Not using telemedicine (228)<br>Arm 2 - Using telemedicine (51)                                                                                                                                                                                     | Likely to lose weight                                                                     | NR               | NR                                                                                                                                                                                                                                                                                                                           | Ref: Arm1<br>Odds ratio: 2.79 (95% CI: 1.04 to 7.48),<br>p=0.042                      | Gender, age, baseline weight, treatment, exercise level, mood, dietary score |

| Author, Year       | Clinical Area | Arm Definition (n)                                                                                                  | Outcome                                                                                     | Time of Analysis                 | Participants With Outcomes, n (%)                                                                                                                                                                                                                                                     | Comparison                                                                                                                                         | Adjusted                                       |
|--------------------|---------------|---------------------------------------------------------------------------------------------------------------------|---------------------------------------------------------------------------------------------|----------------------------------|---------------------------------------------------------------------------------------------------------------------------------------------------------------------------------------------------------------------------------------------------------------------------------------|----------------------------------------------------------------------------------------------------------------------------------------------------|------------------------------------------------|
| Tchang, 2022(69)   | 2c            | Arm 1 - In-person (69)<br>Arm 2 - Hybrid (85)<br>Arm 3 - Video (91)                                                 | ≥5% weight loss                                                                             | 6 months                         | Arm 1 - 32 (46.4)<br>Arm 2 - 47 (55.3)<br>Arm 3 - 54 (59.3)                                                                                                                                                                                                                           | Ref: Arm 1, p=0.26                                                                                                                                 | No                                             |
| Walker, 2023(71)   | 2c            | Arm 1 - In-person (20,666)<br>Arm 2 - Telehealth (10,988)                                                           | Likelihood of HbA1C in control                                                              | NR                               | Arm 1 - NR (NR)<br>Arm 2 - NR (NR)                                                                                                                                                                                                                                                    | Ref: Arm 1 Likelihood estimate of HbA1C in control: 0.013 (: 0.002 to 0.024), p=<0.023                                                             | Baseline characteristic, facility fixed effect |
| Ye, 2022(73)       | 2c            | Arm 1 - In-person (20,745)<br>Arm 2 - 1 telemedicine visit (6,878)<br>Arm 3 - 2 or more telemedicine visits (5,104) | Not Meeting the Controlling High Blood Pressure quality measure (all hypertension patients) | NR                               | NR                                                                                                                                                                                                                                                                                    | Ref: Arm 1<br>Arm 2 - Odds ratio: 2.06 (95% CI: 1.94 to 2.18), p=<0.001<br>Ref: Arm 1<br>Arm 3 - Odds ratio: 2.49 (95% CI: 2.31 to 2.68), p=<0.001 | No                                             |
| Levinson, 2021(37) | 3             | Arm 1 - In-person (60)<br>Arm 2 - Telehealth, zoom (33)                                                             | Body Mass Index                                                                             | Mean stay: 11.32 weeks Discharge | Arm 1 - Continuous data<br>Baseline: NR<br>Follow-up: Mean: 24.78 (SD 7.63)<br>Arm 2 - Continuous data<br>Baseline: NR<br>Follow-up: Mean: 26.26 (SD 10.39)                                                                                                                           | Ref: Arm 1 p=NS                                                                                                                                    | No                                             |
| Prato, 2022(55)    | 3             | Arm 1 - In-person (20)<br>Arm 2 - Telehealth, zoom (20)                                                             | Yale Global Tic Severity Rating Scale (YGTSS)                                               | 2 months                         | Arm 1 - Continuous data<br>Baseline: 25.8 (SD 7.3)<br>Follow-up: Mean: 13.7 (SD 5.4), % change from baseline -7.7 (95% CI: -8.9 to -6.4)<br>Arm 2 - Continuous data<br>Baseline: 25.5 (SD 10.5)<br>Follow-up: Mean: 14.1 (SD 6.3), % change from baseline -6.6 (95% CI: -7.7 to -5.5) | Ref: Arm 1 , % change from baseline: 1.1 (95% CI: -0.6 to 2.7), p=NR                                                                               | No                                             |
|                    |               |                                                                                                                     | Children's Yale-Brown Obsessive-Compulsive Scale for Children (CY-BOCS)                     | 2 months                         | Arm 1 - Continuous data, Baseline: Mean: 22.7 (SD 12.7), Follow-up: Mean: 15.1 (SD 7.2), % change from baseline: -3.4 (95% CI: -4.6 to -2.2)<br>Arm 2 - Continuous data<br>Baseline: Mean: 22.3 (SD 12), Follow-up: mean: 14.3 (SD 6.6), % change from baseline: -4.3 (95% CI: -5.4   | Ref: Arm 1 , % change from baseline: -0.9 (95% CI: -2.5 to 0.7), p=NR                                                                              | No                                             |

| Author, Year | Clinical Area | Arm Definition (n) | Outcome                                            | Time of Analysis | Participants With Outcomes, n (%)                                                                                                                                                                                                                                                               | Comparison                                                         | Adjusted |
|--------------|---------------|--------------------|----------------------------------------------------|------------------|-------------------------------------------------------------------------------------------------------------------------------------------------------------------------------------------------------------------------------------------------------------------------------------------------|--------------------------------------------------------------------|----------|
|              |               |                    |                                                    |                  | to -3.2)                                                                                                                                                                                                                                                                                        |                                                                    |          |
|              |               |                    | Multidimensional Anxiety Scale for Children (MASC) | 2 months         | Arm 1 - Continuous data<br>Baseline: Mean: 36.2 (SD 15.3), Follow-up: Mean: 22.6 (SD 5.4), % change from baseline: -5.1 (95% CI: -6.3 to -3.9)<br>Arm 2 - Continuous data<br>Baseline: Mean: 35.1 (SD 16.8), Follow-up: mean: 21.6 (SD 10.1), % change from baseline: -6 (95% CI: -7.2 to -4.9) | Ref: Arm 1, % change from baseline: -1 (95% CI: -2.6 to 0.7), p=NR | No       |

1a=general medical care, adults; 1b=general medical care, children; 1c=general medical care, all ages; 2a=specialized care, COVID-19; 2b=specialized care, pregnancy/prenatal/gynecological; 2c=specialized care, other; 3=general behavioral/mental health. CI=confidence interval; N=sample size; NR=not reported; OR=odds ratio; p=p-value; Ref=reference. BP=blood pressure; CI=confidence interval; IQR=interquartile range; ml=milliliter; N=sample size; NR=not reported; OR=odds ratio; p=p-value; Ref=reference; SD=standard deviation; SE=standard error

**Supplementary Table 5-D. Study Results Investigating the Effectiveness of Telehealth vs. In-person Care by Outcome Category and Clinical Area – Clinical Outcomes, Adverse Events.**

| Author, Year       | Clinical Area | Arm Definition (n)                                                                                                                                                               | Outcome                                                        | Time of Analysis                   | Participants With Outcomes, n (%)                                                                                                                        | Comparison                                                                   | Adjusted                                                                                                                          |
|--------------------|---------------|----------------------------------------------------------------------------------------------------------------------------------------------------------------------------------|----------------------------------------------------------------|------------------------------------|----------------------------------------------------------------------------------------------------------------------------------------------------------|------------------------------------------------------------------------------|-----------------------------------------------------------------------------------------------------------------------------------|
| McNamara, 2021(45) | 1a            | Arm 1 - Face to face (341)<br>Arm 2 – Telehealth (151)                                                                                                                           | Average medication related problems per encounter              | NR                                 | Arm 1 - Continuous data<br>Baseline: NR<br>Follow-up: Mean: 1.65 (SD 1.56)<br>Arm 2 - Continuous data<br>Baseline: NR<br>Follow-up: Mean: 1.06 (SD 1.21) | Ref: Arm 1, p<<0.01                                                          | No                                                                                                                                |
|                    |               |                                                                                                                                                                                  | Medication related problem: adverse drug event (per encounter) | NR                                 | Arm 1 - Continuous data<br>Baseline: NR<br>Follow-up: Mean: 0.05 (SD 0.45)<br>Arm 2 - Continuous data<br>Baseline: NR<br>Follow-up: Mean: 0.12 (SD 0.34) | Ref: Arm 1, p=0.496                                                          | No                                                                                                                                |
| Aiken, 2021(4)     | 2b            | Arm 1 - Individuals receiving medical abortion following in-person visit (22,158)<br>Arm 2 - Individuals receiving medical abortion following telemedicine/hybrid visit (29,984) | Adverse Effect:<br>Major Surgery                               | 59 days (Arm 1)<br>85 days (Arm 2) | Arm 1 - 0 (0)<br>Arm 2 - 0 (0)                                                                                                                           | Ref: Arm 1<br>Covariate adjusted test of difference or proportions: NR, p=NR | Patient age, race/ethnicity, gestational age, parity and prior abortions using logistic regression and weighted risk differences. |



| Author, Year       | Clinical Area | Arm Definition (n)                                                                                                                                                           | Outcome                                                                                                   | Time of Analysis | Participants With Outcomes, n (%)                                                                                                       | Comparison                                                                  | Adjusted                                                            |
|--------------------|---------------|------------------------------------------------------------------------------------------------------------------------------------------------------------------------------|-----------------------------------------------------------------------------------------------------------|------------------|-----------------------------------------------------------------------------------------------------------------------------------------|-----------------------------------------------------------------------------|---------------------------------------------------------------------|
| Duryea, 2021(15)   | 2b            | Arm 1 - Pregnant individuals who received in-person prenatal Care (6,559)<br>Arm 2 - Pregnant individuals who received audio telehealth and in- person prenatal care (6,048) | Composite Outcome (Still Birth, Full-term NICU Admission, Placental Abruption, Arterial Blood Gas pH <7.0 | 183 Days         | Arm 1 - 195 (0.03)<br>Arm 2 - 173 (0.029)                                                                                               | Ref: Arm 1<br>Relative risk: 0.96 (95% CI: 0.78 to 1.17), p=0.71            | BMI at delivery, race                                               |
| Kerestes, 2021(32) | 2b            | Arm 1 - In person (94)<br>Arm 2 – Telemedicine + med pick up (124)<br>Arm 2 – Telemedicine + Mailed Medicine (69)                                                            | Complication: Blood Transfusion                                                                           | 252 days         | Arm 1 - 0 (0)<br>Arm 2 - 2 (1.6)<br>Arm 3 - 0 (0)                                                                                       | NR                                                                          | No                                                                  |
| Pinsker,2021(54)   | 2c            | Arm 1 - Individuals with diabetes receiving in-person insulin pump training (14,284)<br>Arm 2 - Individuals with diabetes receiving virtual insulin pump training (8,984)    | Adverse Event                                                                                             | NR               | Arm 1 - Continuous Baseline: NR<br>Follow-up: Mean: 0.04 (SD 0.24)<br>Arm 2 - Continuous Baseline: NR<br>Follow-up: Mean: 0.03 (SD 0.2) | Ref: Arm 1, p=0.003                                                         | Training method, age, previous therapy, trainer type, baseline A1c  |
| Severino, 2022(61) | 2c            | Arm 1 - Telehealth (92)<br>Arm 2 - In-person (92)                                                                                                                            | Major adverse cardiovascular events                                                                       | 12 months        | Arm 1 - 18 (0.197)<br>Arm 2 - 20 (0.217)                                                                                                | Ref: Arm 1(telehealth)<br>Hazard ratio: 1.15 (95% CI: 0.61 to 2.19), p=0.65 | Age, gender, clinical characteristics, echocardiographic parameters |
| Fortier, 2022(20)  | 3             | Arm 1 - In-person (29)<br>Arm 2 - Telephone (45)                                                                                                                             | Adverse events                                                                                            | 24 weeks         | Arm 1 – 0 (0)<br>Arm 2 - 0 (0)                                                                                                          | NR                                                                          | No                                                                  |

1a=general medical care, adults; 1b=general medical care, children; 1c=general medical care, all ages; 2a=specialized care, COVID-19; 2b=specialized care, pregnancy/prenatal/gynecological; 2c=specialized care, other; 3=general behavioral/mental health. CI=confidence interval; N=sample size; NR=not reported; OR=odds ratio; p=p-value; Ref=reference. BMI=body mass index; CI=confidence interval; COPD=Chronic obstructive pulmonary disease; N=sample size; NA=not available; NR=not reported; OR=odds ratio; p=p-value; Ref=reference; SD=standard deviation

**Supplementary Table 6-A. Study Results Investigating the Effectiveness of Telehealth vs. In-person Care by Outcome Category and Clinical Area – Process Outcomes, Missed Visits.**

| Author, Year      | Clinical Area | Arm Definition (n)                                                                                                                                                                                                                                                    | Outcome            | Time of Analysis                      | Participants With Outcomes, n (%)                                                      | Comparison                                                                                                                                                                         | Adjusted                                                                                                                         |
|-------------------|---------------|-----------------------------------------------------------------------------------------------------------------------------------------------------------------------------------------------------------------------------------------------------------------------|--------------------|---------------------------------------|----------------------------------------------------------------------------------------|------------------------------------------------------------------------------------------------------------------------------------------------------------------------------------|----------------------------------------------------------------------------------------------------------------------------------|
| Mathews, 2022(43) | 1a            | Arm 1 - In-person (1,493)<br>Arm 2 - Telehealth (684)                                                                                                                                                                                                                 | Missed appointment | NR                                    | Arm 1 - Events 143 (NR)<br>Arm 2 - Events 25 (NR)                                      | Ref: Arm 1 percentage difference: -0.8252, p=<NR                                                                                                                                   | No                                                                                                                               |
| Chen, 2023(13)    | 1a            | Arm 1 - In-person, telehealth transition period (March 2020-June 2020) (52,697 visits)<br>Arm 2 - Telephone, telehealth transition period (March 2020-June 2020) (132,713 visits)<br>Arm 3 - Video, telehealth transition period (March 2020-June 2020) (98 visits)   | Non-attendance     | NR                                    | Arm 1 - Events: NR (0.365)<br>Arm 2 - Events: NR (0.352)<br>Arm 3 - Events: NR (0.673) | Ref: Arm 1 Odds ratio (Arm 2 comparing to Arm 1): 1.04 (95% CI: 1.02 to 1.07), p=<0.001<br>Ref: Arm 1 Odds ratio (Arm 3 comparing to Arm 1): 4.37 (95% CI: 2.74 to 6.97), p=<0.001 | Demographic factors and patient and clinic variation                                                                             |
|                   |               | Arm 1 - In-person, elective telehealth period (July 2020-August 2021) (492,254 visits)<br>Arm 2 - Telephone, elective telehealth period (July 2020-August 2021) (305,197 visits)<br>Arm 3 - Video, elective telehealth period (July 2020-August 2021) (26,232 visits) | Non-attendance     | NR                                    | Arm 1 - Events: NR (0.252)<br>Arm 2 - Events: NR (0.212)<br>Arm 3 - Events: NR (0.355) | Ref: Arm 1 Odds ratio (Arm 2 comparing to Arm 1): 0.82 (95% CI: 0.81 to 0.83), p=<0.001<br>Ref: Arm 1 Odds ratio (Arm 3 comparing to Arm 1): 2.02 (95% CI: 1.95 to 2.08), p=<0.001 | Demographic factors and patient and clinic variation                                                                             |
| Adepoju, 2022(2)  | 1c            | Arm 1 - In-person (207,621)<br>Arm 2 - Telemedicine (70,550)                                                                                                                                                                                                          | Missed appointment | NR                                    | Arm 1 - Events 38,750 (18.7)<br>Arm 2 - Events 11,113 (15.8)                           | Ref: Arm 1 Odds ratio: 0.87 (95% CI: 0.84 to 0.89), p=<0.001                                                                                                                       | Patient sociodemographic characteristics, geographic classification, medical appointment information, and clinic characteristics |
| Adams, 2023(1)    | 2b            | Arm 1 - In-person (NR)<br>Arm 2 - Telehealth (NR)                                                                                                                                                                                                                     | Visit show rate    | Peak Covid, 6-12 week Visit show rate | Arm 1 - NR (0.65)<br>Arm 2 - NR (0.76)                                                 | Ref: Arm 1, Relative risk: 1.17 (95% CI:                                                                                                                                           | NR                                                                                                                               |

| Author, Year     | Clinical Area | Arm Definition (n)                                                                                                                                    | Outcome                                    | Time of Analysis                         | Participants With Outcomes, n (%)                                                | Comparison                                                                                                                                             | Adjusted                                                                               |
|------------------|---------------|-------------------------------------------------------------------------------------------------------------------------------------------------------|--------------------------------------------|------------------------------------------|----------------------------------------------------------------------------------|--------------------------------------------------------------------------------------------------------------------------------------------------------|----------------------------------------------------------------------------------------|
|                  |               |                                                                                                                                                       |                                            |                                          |                                                                                  | 0.87 to 1.57),<br>p=0.31                                                                                                                               |                                                                                        |
|                  |               |                                                                                                                                                       |                                            | Peak Covid, <6 week Visit show rate      | Arm 1 - NR (0.57)<br>Arm 2 - NR (0.96)                                           | Ref: Arm 1,<br>Relative risk:<br>1.7 (95% CI:<br>1.31 to 2.22),<br>p=<0.001                                                                            |                                                                                        |
|                  |               |                                                                                                                                                       |                                            | Ongoing Covid, 6-12 week Visit show rate | Arm 1 - NR (0.74)<br>Arm 2 - NR (0.85)                                           | Ref: Arm 1,<br>Relative risk:<br>1.16 (95% CI: 0.9<br>to 1.5), p=0.26                                                                                  |                                                                                        |
|                  |               |                                                                                                                                                       |                                            | Ongoing Covid, <6 week Visit show rate   | Arm 1 - NR (0.88)<br>Arm 2 - NR (0.96)                                           | Ref: Arm 1,<br>Relative risk:<br>1.09 (95% CI:<br>0.93 to 1.29),<br>p=0.29                                                                             |                                                                                        |
| Arias, 2022(5)   | 2b            | Arm 1 - Pre-telehealth Implementation (780)<br>Arm 2 - Post-telehealth Implementation (799)                                                           | Postpartum visit attendance rate           | NR                                       | Arm 1 - 565 (72.4)<br>Arm 2 - 662 (82.9)                                         | Ref: Arm 1<br>Odds ratio: 1.9<br>(95% CI: 1.47<br>to 2.46),<br>p=<0.001                                                                                | Race, prenatal care provider, parity, gestational age at delivery and insurance status |
|                  |               |                                                                                                                                                       | Cardiology follow-up visit attendance rate | NR                                       | Arm 1 - 29 (51.8)<br>Arm 2 - 36 (61)                                             | Ref: Arm 1<br>Odds ratio:<br>1.8 (95% CI:<br>0.79 to 4.11),<br>p=0.32                                                                                  | Prenatal care provider only                                                            |
| Clark, 2022(14)  | 2b            | Arm 1 - In-person (1,253)<br>Arm 2 - Telehealth (1,411)                                                                                               | Missed appointment                         | NR                                       | Arm 1 - Events 77 (0.0615)<br>Arm 2 - 17 (0.0121)                                | Ref: Arm 1,<br>p=<0.001                                                                                                                                | No                                                                                     |
| Boshara, 2022(9) | 2c            | Arm 1 - In-person (332 visits)<br>Arm 2 - Telehealth (246 visits)                                                                                     | Appointment adherence                      | NR                                       | Arm 1 - NR (70.8)<br>Arm 2 - NR (79.2)                                           | Ref: Arm 1,<br>p=<0.001                                                                                                                                | Paired data                                                                            |
| Klain, 2021(34)  | 2c            | Arm 1 - 2019 visit (corresponding period to follow-up visit during COVID-19) (525)<br>Arm 2 - 2020 telemedicine follow-up visit during COVID-19 (445) | Outpatient F/U evaluations                 | NR                                       | NR                                                                               | Ref: Evaluations in corresponding 2019 period<br>Difference in number of evaluations: -0.15 (15% missed outpatient visit in 2020 comparing 2019), p=NR | No                                                                                     |
| Sohail, 2023(65) | 2c            | Arm 1 - In-person<br>Arm 2 - Video visit<br>Arm 3 - Telephone visit                                                                                   | Appointment no-show                        | NR                                       | Arm 1 - Event NR (0.204)<br>Arm 2 - Event NR (0.122)<br>Arm 3 - Event NR (0.126) | Ref: Arm 1,<br>Odds ratio<br>(Arm 2<br>comparing to<br>Arm 1): 0.61<br>(95% CI: 0.52<br>to 0.71),                                                      | Raw patient numbers not available, calculated based on percentages in text             |

| Author, Year     | Clinical Area | Arm Definition (n)                                                                                 | Outcome                                            | Time of Analysis | Participants With Outcomes, n (%)                                                                                                                              | Comparison                                                                                       | Adjusted                                         |
|------------------|---------------|----------------------------------------------------------------------------------------------------|----------------------------------------------------|------------------|----------------------------------------------------------------------------------------------------------------------------------------------------------------|--------------------------------------------------------------------------------------------------|--------------------------------------------------|
|                  |               |                                                                                                    |                                                    |                  |                                                                                                                                                                | p<0.05<br>Ref: Arm 1, Odds ratio (Arm 3 comparing to Arm 1): 0.57 (95% CI: 0.52 to 0.63), p<0.05 |                                                  |
| Sun, 2022(66)    | 2c            | Arm 1 - In-person<br>Arm 2 - Telehealth                                                            | Appointment no-show                                | NR               | Arm 1 - NR<br>Arm 2 - NR                                                                                                                                       | Ref: Arm 1<br>Odds ratio: 0.43 (95% CI: 0.32 to 0.57), p=0                                       | Multivariable random effects logistic regression |
| Watson, 2021(72) | 2c            | Arm 1 - Pre- telephone clinic (face to face) (814)<br>Arm 2 - Post- introduction (telephone) (910) | Proportion of patients who cancelled colonoscopies | NR               | Arm 1 - 13 (1.5)<br>Arm 2 - 22 (2.5)                                                                                                                           | Ref: Arm 1<br>p-value only:<br>p=0.14                                                            | No                                               |
| Zhu, 2021(76)    | 2c            | Arm 1 - In-person (2019) (1,443)<br>Arm 2 - Telephone (2020) (1,597)                               | Appointment non-attendance                         | NR               | Arm 1 - 157 (10.9)<br>Arm 2 - 104 (6.5)                                                                                                                        | Ref: Arm 1<br>Odds ratio:<br>0.57 (95% CI:<br>0.44 to 0.739),<br>p<0.001                         | No                                               |
| Rene, 2022(57)   | 3             | Arm 1 - In-person (157)<br>Arm 2 - Telehealth (181)                                                | Cancellation                                       | NR               | Arm 1 - Continuous data<br>Baseline: Mean: NR<br>Follow-up: Mean: 0.36 (SD 0.76)<br>Arm 2 - Continuous data<br>Baseline: NR<br>Follow-up: Mean: 0.45 (SD 0.81) | Ref: Arm 1<br>p=0.003                                                                            | No                                               |
|                  |               |                                                                                                    | No show                                            | NR               | Arm 1 - Continuous data<br>Baseline: Mean: NR<br>Follow-up: Mean: 0.25 (SD 0.54)<br>Arm 2 - Continuous data<br>Baseline: NR<br>Follow-up: Mean: 0.38 (SD 0.67) | Ref: Arm 1<br>p=0.26                                                                             | No                                               |
| Zayde, 2021(74)  | 3             | Arm 1 - Pre-pandemic (12)<br>Arm 2 - Post-pandemic (12)                                            | No show rates                                      | 20 Weeks         | Arm 1 - Continuous data<br>Baseline: Mean: 0.23 (SD 0.23)<br>Arm 2 - Follow-up: Mean: 0.32 (SD 0.25)                                                           | NR                                                                                               | No                                               |

1a=general medical care, adults; 1b=general medical care, children; 1c=general medical care, all ages; 2a=specialized care, COVID-19; 2b=specialized care, pregnancy/prenatal/gynecological; 2c=specialized care, other; 3=general behavioral/mental health. CI=confidence interval; N=sample size; NR=not reported; OR=odds ratio; p=p-value; Ref=reference. BMI=body mass index; CI=confidence interval; COPD=Chronic obstructive pulmonary disease; N=sample size; NA=not available; NR=not reported; OR=odds ratio; p=p-value; Ref=reference; SD=standard deviation

**Supplementary Table 6-B. Study Results Investigating the Effectiveness of Telehealth vs. In-person Care by Outcome Category and Clinical Area – Process Outcomes, Case Resolution/Duplication.**

| Author, Year       | Clinical Area | Arm Definition (n)                                                                                                                                                                                                                                                | Outcome                                                     | Time of Analysis   | Participants With Outcomes, n (%)                                                                                                                                                                    | Comparison                                               | Adjusted                                                                                   |
|--------------------|---------------|-------------------------------------------------------------------------------------------------------------------------------------------------------------------------------------------------------------------------------------------------------------------|-------------------------------------------------------------|--------------------|------------------------------------------------------------------------------------------------------------------------------------------------------------------------------------------------------|----------------------------------------------------------|--------------------------------------------------------------------------------------------|
| Jazayeri, 2022(30) | 1b            | Arm 1 - In-person (1,131)<br>Arm 2 - Telehealth (638)                                                                                                                                                                                                             | Follow-up visits                                            | NR                 | Arm 1 - Continuous Baseline: Mean: 1.208 (SD 0.443), Follow-up: NR<br>Arm 2 - Continuous Baseline: Mean: 1.21 (SD 0.495), Follow-up: NR                                                              | Ref: Arm 1 t-test between means: NR<br>p=0.922           | No                                                                                         |
| Tarn, 2021(68)     | 1c            | Arm 1 - Patients receiving in-person outpatient care at primary care clinic (52)<br>Arm 2 - Patients receiving telephone outpatient care at primary care clinic (55)<br>Arm 3 - Patients receiving telehealth( video) outpatient care at primary care clinic (89) | Telemedicine visit                                          | NR                 | Arm 1 - Continuous Baseline: Mean: 1.1 (SD 0.3), Follow-up: NR<br>Arm 2 - Continuous Baseline: Mean: 1.16 (SD 0.46), Follow-up: NR<br>Arm 3 - Continuous Baseline: Mean: 2.3 (SD 0.7), Follow-up: NR | NR                                                       | No                                                                                         |
| Hatef, 2022(28)    | 1c            | Arm 1 - First encounter in- person (493,716)<br>Arm 2 - First encounter telemedicine (113,857)                                                                                                                                                                    | Acute ambulatory care, follow-up encounter                  | 14 days            | NR (NR)                                                                                                                                                                                              | Ref: Arm 1 Odds ratio: 1.44 (95% CI: 1.42 to 1.46), p=NR | Type of acute and chronic ambulatory care sensitive conditions treated during the episode. |
|                    |               | Arm 1 - First encounter in- person (410,743)<br>Arm 2 - First encounter telemedicine (94,481)                                                                                                                                                                     | Chronic ambulatory care, follow-up encounter                | 14 days            | NR (NR)                                                                                                                                                                                              | Ref: Arm 1 Odds ratio: 0.94 (95% CI: 0.92 to 0.95), p=NR | Type of acute and chronic ambulatory care sensitive conditions treated during the episode. |
| Carlberg, 2020(11) | 2a            | Arm 1 - Patients receiving telehealth and in- person evaluation in the ED (132)<br>Arm 2 - Patients receiving telehealth only evaluation in the ED (153)                                                                                                          | Return to healthcare within 72 hours                        | 72 hours           | Arm 1 - 7 (5.3)<br>Arm 2 - 6 (3.9)                                                                                                                                                                   | NR                                                       | No                                                                                         |
|                    |               |                                                                                                                                                                                                                                                                   | Admitted upon return, Within 72 hours, Non-COVID-19 related | 72 hours           | Arm 1 - 5 (3.8)<br>Arm 2 - 4 (2.6)                                                                                                                                                                   | NR                                                       | No                                                                                         |
| Kerestes, 2021(32) | 2b            | Arm 1 - In person abortion service (94)<br>Arm 2 – Telemedicine + med pick up (124)<br>Arm 2 – Telemedicine + Mailed Medicine (69)                                                                                                                                | Abortion complication without surgery                       | 243, 244, 245 days | Arm 1 - 88 (0.936)<br>Arm 2 - 120 (0.968)<br>Arm 3 - 67 (0.971)                                                                                                                                      | NR                                                       | No                                                                                         |
| Fredwall, 2021(21) | 2c            | Arm 1 - Patients seen in- person at Epilepsy Clinic (101)<br>Arm 2 - Patients seen by telemedicine at Epilepsy Clinic (16)                                                                                                                                        | Linked with counseling, 1 month                             | 1 month            | Arm 1 - NR (75)<br>Arm 2 - 8 (35)                                                                                                                                                                    | NR                                                       | No                                                                                         |
|                    |               |                                                                                                                                                                                                                                                                   | Linked with counseling, 3 months                            | 3 months           | Arm 1 - NR (76)<br>Arm 2 - 10 (63)                                                                                                                                                                   | NR                                                       | No                                                                                         |

| Author, Year        | Clinical Area | Arm Definition (n)                                                                                                                                                                                                               | Outcome                                                        | Time of Analysis | Participants With Outcomes, n (%)                                                                                                            | Comparison                                                    | Adjusted                                                                                            |
|---------------------|---------------|----------------------------------------------------------------------------------------------------------------------------------------------------------------------------------------------------------------------------------|----------------------------------------------------------------|------------------|----------------------------------------------------------------------------------------------------------------------------------------------|---------------------------------------------------------------|-----------------------------------------------------------------------------------------------------|
| Kolb, 2021(35)      | 2c            | Arm 1 - Patients receiving in-person outpatient care at ENT clinic (Recurrent Acute Otitis Media Cohort) (50)<br>Arm 2 - Patients receiving telehealth outpatient care at ENT clinic, (Recurrent Acute Otitis Media Cohort) (50) | Routine follow-up recommended                                  | 42 days          | Arm 1 - 16 (32)<br>Arm 2 - 10 (20)                                                                                                           | Ref: Arm 1 Chi- Squared Test: NR, p=0.254                     | No                                                                                                  |
| Mossack, 2022(48)   | 2c            | Arm 1 - In-person (25)<br>Arm 2 - Telephone (23)                                                                                                                                                                                 | >= 1 follow up                                                 | NR               | Arm 1 - 16 (64)<br>Arm 2 - 18 (78)                                                                                                           | Ref: Arm1, p=0.278                                            | No                                                                                                  |
|                     |               |                                                                                                                                                                                                                                  | 30 day follow-up                                               | 30 days          | Arm 1 - 7 (28)<br>Arm 2 - 9 (39)                                                                                                             | Ref: Arm1, p=0.414                                            | No                                                                                                  |
|                     |               |                                                                                                                                                                                                                                  | 60 day follow-up                                               | 60 days          | Arm 1 - 14 (56)<br>Arm 2 - 15 (65)                                                                                                           | Ref: Arm1, p=0.514                                            | No                                                                                                  |
|                     |               |                                                                                                                                                                                                                                  | 90 day follow-up                                               | 90 days          | Arm 1 - 15 (60)<br>Arm 2 - 18 (78)                                                                                                           | Ref: Arm1, p=0.173                                            | No                                                                                                  |
| Zhu, 2021(76)       | 2c            | Arm 1 - In-person (2019) (1,286)<br>Arm 2 - Telephone (2020) (1,493)                                                                                                                                                             | Follow-up phone call                                           | NR               | Arm 1 - 29 (2.3)<br>Arm 2 - 48 (3.2)                                                                                                         | Ref: Arm 1 Odds ratio: 1.44 (95% CI: 0.901 to 2.293), p=0.127 | No                                                                                                  |
| Li, 2021(38)        | 2c            | Arm 1 - Patients triaged in- person for ophthalmologic issue (51)<br>Arm 2 - Patients receiving virtual triage for ophthalmologic issue (183)                                                                                    | Need in- person ophthalmologic review                          | NR               | Arm 1 - 400 (88.7)<br>Arm 2 - 220 (54.6)                                                                                                     | Ref: Arm 1 Chi- Squared: 128.2, p<0.001                       | No                                                                                                  |
|                     |               |                                                                                                                                                                                                                                  | Return to the Emergency Room within 1 month                    | 30 days          | Arm 1 - 8 (15.7)<br>Arm 2 - 65 (35.5)                                                                                                        | Ref: Arm 1 Chi- Squared: 7.31, p=0.007                        | No                                                                                                  |
| Rowe, 2021(59)      | 2c            | Arm 1 - Telephone Cardiology Outpatient Visits (1,118)<br>Arm 2 - Video Cardiology Outpatient Visits (327)                                                                                                                       | Follow-up appointment within study period                      | 148 days         | Arm 1 - 196 (16.5)<br>Arm 2 - 79 (24.2)                                                                                                      | Ref: Arm 1, p=0.015                                           | Age, Gender, English as First Language, Rural Status, initial appointment status, cardiologist seen |
| Offiah, 2022(49)    | 2c            | Arm 1 - Traditional clinic (1,220)<br>Arm 2 - Virtual clinic (496)                                                                                                                                                               | Return clinic                                                  | NR               | Arm 1 - 980 (80.3)<br>Arm 2 - 353 (71.2)                                                                                                     | Ref: Arm1, p=0.0003                                           | No                                                                                                  |
| Lindhagen, 2022(39) | 2c            | Arm 1 - Pre-COVID-19 Pandemic (814)<br>Arm 2 - COVID-19 Pandemic (910)                                                                                                                                                           | Number of unplanned telephone contacts with doctor per patient | NR               | Arm 1 - Continuous data Baseline: NR, Follow-up: Mean: 0.88 (SD 1.89)<br>Arm 2 - Continuous data Baseline: NR, Follow-up: Mean: 0.9 (SD 1.9) | Ref: Arm 1, p=0.379                                           | No                                                                                                  |
| Metcalfe, 2023(46)  | 2c            | Arm 1 - In-person (75)<br>Arm 2 - Telemedicine (75)                                                                                                                                                                              | Number of patients followed-up                                 | NR               | Arm 1 - 22 (29)<br>Arm 2 - 53 (71)                                                                                                           | Ref: Arm 1 Odds ratio: 5.8 (95% CI: NR), p<0.001              | No                                                                                                  |

1a=general medical care, adults; 1b=general medical care, children; 1c=general medical care, all ages; 2a=specialized care, COVID-19; 2b=specialized care, pregnancy/prenatal/gynecological; 2c=specialized care, other; 3=general behavioral/mental health. CI=confidence interval; N=sample size; NR=not reported; OR=odds ratio; p=p-value;

| Author, Year                                                                                                                                                                                                             | Clinical Area | Arm Definition (n) | Outcome | Time of Analysis | Participants With Outcomes, n (%) | Comparison | Adjusted |
|--------------------------------------------------------------------------------------------------------------------------------------------------------------------------------------------------------------------------|---------------|--------------------|---------|------------------|-----------------------------------|------------|----------|
| Ref=reference. BMI=body mass index; CI=confidence interval; COPD=Chronic obstructive pulmonary disease; N=sample size; NA=not available; NR=not reported; OR=odds ratio; p=p-value; Ref=reference; SD=standard deviation |               |                    |         |                  |                                   |            |          |

**Supplementary Table 6-C. Study Results Investigating the Effectiveness of Telehealth vs. In-person Care by Outcome Category and Clinical Area – Process Outcomes, Change in Therapy/Medication.**

| Author, Year       | Clinical Area | Arm Definition (n)                                                 | Outcome                                                                     | Time of Analysis | Participants With Outcomes, n (%)                                                                                                                        | Comparison                                                 | Adjusted                                                                                                          |
|--------------------|---------------|--------------------------------------------------------------------|-----------------------------------------------------------------------------|------------------|----------------------------------------------------------------------------------------------------------------------------------------------------------|------------------------------------------------------------|-------------------------------------------------------------------------------------------------------------------|
| McNamara, 2021(45) | 1a            | Arm 1 - Face to face (341)<br>Arm 2 - Telehealth (151)             | Medication related problems: needed additional drug therapy (per encounter) | NR               | Arm 1 - Continuous data<br>Baseline: NR<br>Follow-up: Mean: 0.37 (SD 0.7)<br>Arm 2 - Continuous data<br>Baseline: NR<br>Follow-up: Mean: 0.12 (SD 0.4)   | Ref: Arm 1, p=0.527                                        | No                                                                                                                |
|                    |               |                                                                    | Medication related problems: different drug needed (per encounter)          | NR               | Arm 1 - Continuous data<br>Baseline: NR<br>Follow-up: Mean: 0.09 (SD 0.31)<br>Arm 2 - Continuous data<br>Baseline: NR<br>Follow-up: Mean: 0.06 (SD 0.23) | Ref: Arm 1, p=0.423                                        | No                                                                                                                |
| Wabe, 2022(70)     | 1a            | Arm 1 - Face to face (8,303,233)<br>Arm 2 - Telehealth (5,304,983) | Consultations with at least one medication prescribed                       | NR               | Arm 1 - 3,264,748 (39.3)<br>Arm 2 - 1,751,878 (33)                                                                                                       | Ref: Arm 1 Odds ratio: 1.38 (95% CI: 1.379 to 1.381), p=NR | Age, sex, socioeconomic status, patient status, remoteness, primary health network, and the state of the practice |
|                    |               |                                                                    | Consultations with first-time medication prescribed                         | NR               | Arm 1 - 1,520,401 (18.3)<br>Arm 2 - 537,144 (10.1)                                                                                                       | Ref: Arm 1 Odds ratio: 2.03 (95% CI: 2.02 to 2.031), p=NR  | Age, sex, socioeconomic status, patient status, remoteness, primary health network, and the state of the practice |

| Author, Year         | Clinical Area | Arm Definition (n)                                                                                                                                             | Outcome                                            | Time of Analysis | Participants With Outcomes, n (%)                                                                                                                                                                                                                                                              | Comparison                                                                                                                                                              | Adjusted                                                            |
|----------------------|---------------|----------------------------------------------------------------------------------------------------------------------------------------------------------------|----------------------------------------------------|------------------|------------------------------------------------------------------------------------------------------------------------------------------------------------------------------------------------------------------------------------------------------------------------------------------------|-------------------------------------------------------------------------------------------------------------------------------------------------------------------------|---------------------------------------------------------------------|
| Cobo-Calvo, 2022(15) | 2c            | Arm 1 - Face to face 2018 (276)<br>Arm 2 - Face to face 2019 (360)<br>Arm 3 - Telehealth 2020 (289)<br>Arm 4 - Telehealth extension period (Jan-May 2021) (NR) | Mean monthly treatment prescriptions               | NR               | Arm 1 - Continuous data<br>Baseline: NR, Follow-up: Mean: 23 (SD 8)<br>Arm 2 - Continuous data<br>Baseline: NR, Follow-up: Mean: 30 (SD 7)<br>Arm 3 - Continuous data<br>Baseline: NR, Follow-up: Mean: 24.1 (SD 7)<br>Arm 4 - Continuous data<br>Baseline: NR, Follow-up: Mean: 23.2 (SD 5.5) | Ref: Arm 1 and Arm 2, Arm 3 compared to Arm1:p=0.727, compared to Arm2: p=0.049<br><br>Ref: Arm 2 and Arm 3, Arm 4 compared to Arm1: p=0.072, compared to Arm2: p=0.805 | No                                                                  |
| Lindhagen, 2022(39)  | 2c            | Arm 1 - Pre-COVID-19 Pandemic (868)<br>Arm 2 - COVID-19 Pandemic (891)                                                                                         | Increased medication                               | NR               | Arm 1 - NR (21.3)<br>Arm 2 - NR (22.2)                                                                                                                                                                                                                                                         | Ref: Arm 1, p=0.641                                                                                                                                                     | No                                                                  |
|                      |               |                                                                                                                                                                | Decreased medication                               | NR               | Arm 1 - NR (6.1)<br>Arm 2 - NR (5.9)                                                                                                                                                                                                                                                           | Ref: Arm 1,p=0.914                                                                                                                                                      | No                                                                  |
| Mair, 2021(42)       | 2c            | Arm 1 - Pre-COVID (2019) (210)<br>Arm 2 – Tele-rheumatology (340)                                                                                              | Any medication change                              | NR               | Arm 1 - 79 (37.6)<br>Arm 2 – 84 (24.7)                                                                                                                                                                                                                                                         | Ref: Arm1<br>Difference in proportion : 0.11 (95% CI: 0.04 to 0.19), p=Significant                                                                                      | No                                                                  |
|                      |               |                                                                                                                                                                | No change in disease-modifying antirheumatic drugs | NR               | Arm 1 - 152 (72.4)<br>Arm 2 – 285 (73.9)                                                                                                                                                                                                                                                       | Ref: Arm1<br>Difference in proportion : - 0.13 (95% CI: -0.21 to -0.05), p=Significant                                                                                  | No                                                                  |
| Mossack, 2022(48)    | 2c            | Arm 1 - In-person (25)<br>Arm 2 - Telephone (23)                                                                                                               | Treatment change                                   | NR               | Arm 1 - 9 (NR)<br>Arm 2 - 8 (NR)                                                                                                                                                                                                                                                               | Ref: Arm1, p=0.9                                                                                                                                                        | No                                                                  |
| Offiah, 2022(49)     | 2c            | Arm 1 - Traditional clinic (1,220)<br>Arm 2 - Virtual clinic (496)                                                                                             | Patients ≥ 1 management change                     | NR               | Arm 1 - 470 (38.5)<br>Arm 2 - 99 (19.9)                                                                                                                                                                                                                                                        | Ref: Arm1, p=<0.0000                                                                                                                                                    | No                                                                  |
| Piga, 2022(53)       | 2c            | Arm 1 - In-person (25)<br>Arm 2 - Telephone (23)                                                                                                               | Treatment adjusted                                 | NR               | Arm 1 - 17 (0.16)<br>Arm 2 - 19 (0.179)                                                                                                                                                                                                                                                        | NR                                                                                                                                                                      | No                                                                  |
|                      |               |                                                                                                                                                                | Treatment tapering/cessation                       | NR               | Arm 1 - 9 (0.085)<br>Arm 2 - 11 (0.104)                                                                                                                                                                                                                                                        | NR                                                                                                                                                                      | No                                                                  |
| Severino, 2022(61)   | 2c            | Arm 1 - In-person (92)<br>Arm 2 - Telehealth (92)                                                                                                              | Change in therapy                                  | 12 months        | Arm 1 - 15 (NR)<br>Arm 2 - 19 (NR)                                                                                                                                                                                                                                                             | Ref: Arm 1, p=0.9                                                                                                                                                       | Age, gender, clinical characteristics, echocardiographic parameters |
| Sharma, 2020(64)     | 2c            | Arm 1 - IBD Services before COVID (2019) (50)<br>Arm 2 - IBD Services after COVID (2020) (45)                                                                  | Medication dose escalation                         | 32 days          | Arm 1 - 8 (16)<br>Arm 2 - 8 (18)                                                                                                                                                                                                                                                               | Ref: Arm 1, Fisher's exact test: NR, p=>0.99                                                                                                                            | No                                                                  |



| Author, Year  | Clinical Area | Arm Definition (n)                                                   | Outcome                                     | Time of Analysis | Participants With Outcomes, n (%)        | Comparison                                                                | Adjusted |
|---------------|---------------|----------------------------------------------------------------------|---------------------------------------------|------------------|------------------------------------------|---------------------------------------------------------------------------|----------|
| Zhu, 2021(76) | 2c            | Arm 1 - In-person (2019) (1,286)<br>Arm 2 - Telephone (2020) (1,493) | Changes in analgesia                        | NR               | Arm 1 - 96 (7.5)<br>Arm 2 - 79 (5.3)     | Ref: Arm 1<br>Odds ratio:<br>0.69 (95% CI:<br>0.509 to 0.942),<br>p=0.019 | No       |
|               |               |                                                                      | Clinicians change immunosuppressive therapy | NR               | Arm 1 - 352 (27.4)<br>Arm 2 - 338 (22.6) | Ref: Arm 1<br>Odds ratio:<br>0.78 (95% CI:<br>0.654 to 0.923),<br>p=0.004 | No       |

1a=general medical care, adults; 1b=general medical care, children; 1c=general medical care, all ages; 2a=specialized care, COVID-19; 2b=specialized care, pregnancy/prenatal/gynecological; 2c=specialized care, other; 3=general behavioral/mental health. CI=confidence interval; N=sample size; NR=not reported; OR=odds ratio; p=p-value; Ref=reference. BMI=body mass index; CI=confidence interval; COPD=Chronic obstructive pulmonary disease; N=sample size; NA=not available; NR=not reported; OR=odds ratio; p=p-value; Ref=reference; SD=standard deviation

### Supplementary Table 6-D. Study Results Investigating the Effectiveness of Telehealth vs. In-person Care by Outcome Category and Clinical Area – Process Outcomes, Treatment/ Medication Adherence.

| Author, Year        | Clinical Area | Arm Definition (n)                                                                                                                                                                                                                                          | Outcome                                                   | Time of Analysis | Participants With Outcomes, n (%)                                                                                                                                                                                                           | Comparison                                   | Adjusted                                      |
|---------------------|---------------|-------------------------------------------------------------------------------------------------------------------------------------------------------------------------------------------------------------------------------------------------------------|-----------------------------------------------------------|------------------|---------------------------------------------------------------------------------------------------------------------------------------------------------------------------------------------------------------------------------------------|----------------------------------------------|-----------------------------------------------|
| Griebeler, 2022(27) | 1a            | Arm 1 – In-person (24)<br>Arm 2 – Telehealth (30)                                                                                                                                                                                                           | Full medication compliance                                | NR               | Arm 1 – 18 (0.75)<br>Arm 2 – 24 (0.8)                                                                                                                                                                                                       | Ref: Arm 1,<br>p=0.58                        | No                                            |
| McNamara, 2021(45)  | 1a            | Arm 1 – Face to face (341)<br>Arm 2 – Telehealth (151)                                                                                                                                                                                                      | Medication related problem: non-adherence (per encounter) | NR               | Arm 1 – Continuous data<br>Baseline: NR<br>Follow-up: Mean: 0.01 (SD 0.14)<br>Arm 2 – Continuous data<br>Baseline: NR<br>Follow-up: Mean: 0.01 (SD 0.08)                                                                                    | Ref: Arm 1,<br>p=1                           | No                                            |
| Zimmerman, 2021(77) | 1a            | Arm 1 – In-person (207)<br>Arm 2 – Telehealth (207)                                                                                                                                                                                                         | Completed treatment                                       | NR               | Arm 1 – NR (62.3)<br>Arm 2 – NR (72.9)                                                                                                                                                                                                      | Ref: Arm 1,<br>p<0.05                        | No                                            |
| Baughman, 2021(7)   | 2c            | Arm 1 – Office (54,872)<br>Arm 2 – Telemedicine (8,850)<br>Arm 3 – Telemedicine+Office (63,722)                                                                                                                                                             | Adherent to treatment                                     | 6 months         | Arm 1 – 33,053 (60.2)<br>Arm 2 – 4,960 (56)<br>Arm 3 – 38,013 (59.7)                                                                                                                                                                        | Ref: Arm 1<br>Difference %: 4.2,<br>p<0.001  | No                                            |
| Cvietusa, 2022(17)  | 2c            | Arm 1 – No asthma care (Baseline: NR, Follow-up: 2,977)<br>Arm 2 – In-person only (Baseline: NR, Follow-up: 1,792)<br>Arm 3 – Mixed (in- person and virtual) (Baseline: NR, Follow-up: 1,084)<br>Arm 4 – Virtual care only (Baseline: NR, Follow-up: 1,952) | Proportion of days covered                                | NR               | Arm 1 – Continuous data<br>Baseline: NR Follow-up:<br>Mean: 0.489 (SE 0.007)<br>Arm 2 – Continuous data<br>Baseline: NR Follow-up:<br>Mean: 0.446 (SE 0.008)<br>Arm 3 – Continuous data<br>Baseline: NR Follow-up:<br>Mean: 0.497 (SE 0.01) | Ref: Arm 1,<br>p<0.001 (for all comparisons) | Age, sex, race,<br>baseline value of outcome, |

| Author, Year         | Clinical Area | Arm Definition (n)                                                                                                                                                                           | Outcome                     | Time of Analysis | Participants With Outcomes, n (%)                                            | Comparison                                                                                                                                                                      | Adjusted                                                                                     |
|----------------------|---------------|----------------------------------------------------------------------------------------------------------------------------------------------------------------------------------------------|-----------------------------|------------------|------------------------------------------------------------------------------|---------------------------------------------------------------------------------------------------------------------------------------------------------------------------------|----------------------------------------------------------------------------------------------|
|                      |               |                                                                                                                                                                                              |                             |                  | Arm 4 – Continuous data<br>Baseline: NR Follow-up:<br>Mean: 0.476 (SE 0.008) |                                                                                                                                                                                 |                                                                                              |
| Garmendia, 2021(26)  | 2c            | Arm 1 – Individuals with Sleep Apnea attending outpatient clinic, pre-covid/in-person (193)<br>Arm 2 – Individuals with Sleep Apnea attending outpatient clinic, post-covid, telehealth (77) | CPAP Compliance             | NR               | NR                                                                           | Ref: Arm 1 Chi-squared: NR, p=0.099                                                                                                                                             | No                                                                                           |
| McCoy, 2022(44)      | 2c            | Arm 1 – In-person before telemedicine (113)<br>Arm 2 – Telemedicine (59)<br>Arm 3 – In-person during telemedicine (4)                                                                        | Surgery performed           | NR               | Arm 1 – 41 (36.3)<br>Arm 2 – 24 (40.7)<br>Arm 3 – 2 (50)                     | NR                                                                                                                                                                              | No                                                                                           |
| Mossack, 2022(48)    | 2c            | Arm 1 – In-person (25)<br>Arm 2 – Telephone (23)                                                                                                                                             | Medication adherence        | NR               | Arm 1 – 12 (48)<br>Arm 2 – 12 (52)                                           | Ref: Arm1, p=1                                                                                                                                                                  | No                                                                                           |
| Cunningham, 2022(16) | 3             | Arm 1 – Pre-pandemic (in-person) (72)<br>Arm 2 – Pandemic (telemedicine) (35)                                                                                                                | 90-days treatment retention | 90 days          | Arm 1 – 24 (33.3)<br>Arm 2 – 17 (48.6)                                       | NR                                                                                                                                                                              | No                                                                                           |
| Fortier, 2022(20)    | 3             | Arm 1 – In-person (29)<br>Arm 2 – Telehealth-virtual care (45)                                                                                                                               | Dropout                     | 24 weeks         | Arm 1 – 7 (24)<br>Arm 2 – 8 (18)                                             | Ref: Arm 1 Chi-squared: NR, p=0.506                                                                                                                                             | No                                                                                           |
|                      |               |                                                                                                                                                                                              | Attendance                  | 24 weeks         | Arm 1 – NR (75)<br>Arm 2 – NR (88)                                           | Ref: Arm 1 Z-score NR, p=0.007                                                                                                                                                  | No                                                                                           |
| Frost, 2022(22)      | 3             | Arm 1 – In-person (1,158)<br>Arm 2 – Telehealth (3,180)                                                                                                                                      | Treatment retention         | 90 days          | Arm 1 – 294 (0.254)<br>Arm 2 – 1,024 (0.322)                                 | Ref: Arm 1 Odds ratio: 1.31 (95% CI: 1.12 to 1.53), p=NR                                                                                                                        | Sociodemographic and clinical characteristics                                                |
| Gainer, 2023(24)     | 3             | Arm 1 – In-person (235)<br>Arm 2 – Telephone (222)<br>Arm 3 – Telehealth with video (87)                                                                                                     | Treatment engagement        | NR               | Arm 1 – NR (NR)<br>Arm 2 – NR (NR)<br>Arm 3 – NR (NR)                        | Ref: Arm 1 Odds ratio (Arm 2 comparing to Arm 1): 2.12 (95% CI: 1.05 to 4.28), p=0.036<br>Ref: Arm 1 Odds ratio (Arm 3 comparing to Arm 1): 5.4 (95% CI: 1.92 to 15.2), p=0.001 | Demographics, socioeconomic status, substance use history and other clinical characteristics |
| Ripp, 2022(58)       | 3             | Arm 1 – In-person (2019) (1,077)<br>Arm 2 – Telehealth (2020) (354)                                                                                                                          | Completed follow-up visits  | NR               | NR                                                                           | Ref: Arm 1 Odds ratio: 1.57 (95% CI: 1.23 to 2), p=<0.001                                                                                                                       | Age, sex, race, ethnicity, insurance type, and week of visit                                 |

1a=general medical care, adults; 1b=general medical care, children; 1c=general medical care, all ages; 2a=specialized care, COVID-19; 2b=specialized care, pregnancy/prenatal/gynecological; 2c=specialized care, other; 3=general behavioral/mental health. CI=confidence interval; N=sample size; NR=not reported; OR=odds ratio; p=p-value; Ref=reference. BMI=body mass index; CI=confidence interval; COPD=Chronic obstructive pulmonary disease; N=sample size; NA=not available; NR=not reported; OR=odds ratio; p=p-value; Ref=reference; SD=standard deviation

**Supplementary Table 6-E. Study Results Investigating the Effectiveness of Telehealth vs. In-person Care by Outcome Category and Clinical Area – Process Outcomes, Up to Date Labs and Paraclinical Assessment.**

| Author, Year         | Clinical Area | Arm Definition (n)                                                                                                                                          | Outcome                                                                              | Time of Analysis | Participants With Outcomes, n (%)                                                                                                                                                                                                          | Comparison                                                                                     | Adjusted                                                        |
|----------------------|---------------|-------------------------------------------------------------------------------------------------------------------------------------------------------------|--------------------------------------------------------------------------------------|------------------|--------------------------------------------------------------------------------------------------------------------------------------------------------------------------------------------------------------------------------------------|------------------------------------------------------------------------------------------------|-----------------------------------------------------------------|
| Jazayeri, 2022(30)   | 1b            | Arm 1 - In-person (1,131)<br>Arm 2 - Telehealth (638)                                                                                                       | Imaging orders                                                                       | 3 months         | Arm 1 - Continuous data<br>Baseline: NR, Follow-up:<br>Mean: 0.521 per patient<br>(SD 0.852)<br>Arm 2 - Continuous data<br>Baseline: NR, Follow-up:<br>Mean: 0.364 (SD 0.646)                                                              | Ref: Arm 1<br>t-test between<br>means,<br>p=<0.001                                             | No                                                              |
|                      |               |                                                                                                                                                             | Lab orders                                                                           | 3 months         | Arm 1 - Continuous data<br>Baseline: NR, Follow-up:<br>Mean: 4.867 per patient<br>(SD 5.317)<br>Arm 2 - Continuous data<br>Baseline: NR, Follow-up:<br>Mean: 4.049 (SD 4.901)                                                              | Ref: Arm 1<br>t-test between<br>means, p=0.001                                                 | No                                                              |
|                      |               |                                                                                                                                                             | Procedures                                                                           | 3 months         | Arm 1 - Continuous data<br>Baseline: NR, Follow-up:<br>Mean: 0.128 per patient<br>(SD 0.334)<br>Arm 2 - Continuous data<br>Baseline: NR, Follow-up:<br>Mean: 0.122 (SD 0.328)                                                              | Ref: Arm 1<br>t-test between<br>means, p=0.718                                                 | No                                                              |
| Arias, 2022(5)       | 2b            | Arm 1 - Pre-telehealth Implementation – Diabetic Patients (45)<br>Arm 2 - Post-telehealth Implementation – Diabetic Patients (59)                           | Completion of postpartum glucose tolerance test                                      | NR               | Arm 1 - 12 (26.7)<br>Arm 2 - 15 (25.4)                                                                                                                                                                                                     | Ref: Arm 1<br>Odds ratio:<br>0.99 (95%<br>CI: 0.37 to<br>2.68),<br>p=0.89                      | Race,<br>insurance<br>status, and<br>length of<br>hospital stay |
| Cobo-Calvo, 2022(15) | 2c            | Arm 1 - Face to face 2018 (2,207)<br>Arm 2 - Face to face 2019 (2,356)<br>Arm 3 - Telehealth 2020 (2,202)                                                   | Mean monthly visits                                                                  | NR               | Arm 1 - Continuous data<br>Baseline: NR, Follow-up:<br>Mean: 183.9 (SD 29.1)<br>Arm 2 - Continuous data<br>Baseline: NR, Follow-up:<br>Mean: 196 (SD 17.5)<br>Arm 3 - Continuous data<br>Baseline: NR, Follow-up:<br>Mean: 183.5 (SD 68.9) | Ref: Arm 1<br>and Arm 2, Arm<br>3 compared to<br>Arm1:p=0.984,<br>compared to<br>Arm2: p=0.538 | No                                                              |
| Lindhagen, 2022(39)  | 2c            | Arm 1 - Pre-telephone clinic, face to face (814)<br>Arm 2 – Post introduction, telephone (910)                                                              | Ulcerative colitis,<br>Proportion of<br>patients with<br>surveillance<br>colonoscopy | NR               | Arm 1 - 76 (15)<br>Arm 2 - 49 (9.4)                                                                                                                                                                                                        | Ref: Arm 1,<br>p=0.007                                                                         | No                                                              |
|                      |               |                                                                                                                                                             | Crohn's disease,<br>Proportion of<br>patients with<br>surveillance<br>colonoscopy    | NR               | Arm 1 - 17 (5.1)<br>Arm 2 - 11 (3.3)                                                                                                                                                                                                       | Ref: Arm 1,<br>p=0.224                                                                         | No                                                              |
| Liu, 2021(41)        | 2c            | Arm 1 - Pre-COVID-19 clinic patients at various outpatient facilities (492)<br>Arm 2 - Post-COVID-19 clinic patients at various outpatient facilities (582) | Pathology test/consult completed                                                     | 5 days           | Arm 1 - 426 (86.6)<br>Arm 2 - 443 (76.1)                                                                                                                                                                                                   | Ref: Arm 1<br>Assumed t-test:<br>NR, p<0.001                                                   | No                                                              |

| Author, Year      | Clinical Area | Arm Definition (n)                                                                                                                                          | Outcome                                                                             | Time of Analysis                                                                 | Participants With Outcomes, n (%)                                                                                                                             | Comparison                                                         | Adjusted                                                         |
|-------------------|---------------|-------------------------------------------------------------------------------------------------------------------------------------------------------------|-------------------------------------------------------------------------------------|----------------------------------------------------------------------------------|---------------------------------------------------------------------------------------------------------------------------------------------------------------|--------------------------------------------------------------------|------------------------------------------------------------------|
|                   |               | Arm 1 - Pre-COVID-19 clinic patients at various outpatient facilities (295)<br>Arm 2 - Post-COVID-19 clinic patients at various outpatient facilities (345) | Radiology test/consult completed                                                    | 5 days                                                                           | Arm 1 - 247 (83.7)<br>Arm 2 - 229 (66.4)                                                                                                                      | Ref: Arm 1<br>Assumed t-test:<br>NR, p≤0.001                       | No                                                               |
| Ostberg, 2022(50) | 2c            | Arm 1 - In-person (2019) (455)<br>Arm 2 - Telehealth/zoom (2020) (455)                                                                                      | All order class (imaging, labs, medication, nursing)                                | NR                                                                               | Arm 1 - Continuous data<br>Baseline: NR, Follow-up:<br>Median: 9 (IQR 6, 12)<br>Arm 2 - Continuous data<br>Baseline: NR, Follow-up:<br>Median: 10 (IQR 7, 14) | Ref: Arm 1<br>Rate Ratio: 1.19<br>(95% CI: 1.11 to 1.28, p=<0.001) | Age, gender, billing level, insurance status, and length of stay |
| Parise, 2021(51)  | 2c            | Arm 1 - Not included in telemedicine study (43)<br>Arm 2 - Included in telemedicine study (166)                                                             | Continuous glucose monitoring                                                       | NR                                                                               | Arm 1 - 7 (16)<br>Arm 2 - 155 (93.4)                                                                                                                          | Ref: Arm 1,<br>p=<0.001                                            | No                                                               |
| Reddy, 2021(56)   | 2c            | Arm 1 - Before virtual care (in-person) (763)<br>Arm 2 - Transition to virtual care (168)<br>Arm 3 - After transition to virtual care (813)                 | Laboratory testing                                                                  | 4 weeks before<br>Transition, 1 week during transition, 4 weeks after transition | Arm 1 - 265 (34.7)<br>Arm 2 - 58 (34.5)<br>Arm 3 - 105 (12.9)                                                                                                 | Ref: Arm 1,<br>p=<0.0001                                           | No                                                               |
|                   |               |                                                                                                                                                             | Diagnostic imaging                                                                  | 4 weeks before<br>Transition, 1 week during transition, 4 weeks after transition | Arm 1 - 112 (14.7)<br>Arm 2 - 17 (10.1)<br>Arm 3 - 40 (4.9)                                                                                                   | Ref: Arm 1,<br>p=<0.0001                                           | No                                                               |
|                   |               |                                                                                                                                                             | Procedures (biopsy, paracentesis, acupuncture, endoscopy, catheter exchanges, etc.) | 4 weeks before<br>Transition, 1 week during transition, 4 weeks after transition | Arm 1 - 16 (2.1)<br>Arm 2 - 1 (0.6)<br>Arm 3 - 5 (0.6)                                                                                                        | Ref: Arm 1,<br>p=0.0223                                            | No                                                               |
| Szigety, 2022(67) | 2c            | Arm 1 - In-person (2,642)<br>Arm 2 - Transition to virtual care (1,685)                                                                                     | Genetic testing was recommended                                                     | NR                                                                               | Arm 1 - NR (70.9)<br>Arm 2 - NR (79.5)                                                                                                                        | Ref: Arm1,<br>p=<0.001                                             | No                                                               |
|                   |               |                                                                                                                                                             | Test completion rates                                                               | NR                                                                               | Arm 1 - NR (55.1)<br>Arm 2 - NR (51.2)                                                                                                                        | Ref: Arm1,<br>p=0.09                                               | No                                                               |

1a=general medical care, adults; 1b=general medical care, children; 1c=general medical care, all ages; 2a=specialized care, COVID-19; 2b=specialized care, pregnancy/prenatal/gynecological; 2c=specialized care, other; 3=general behavioral/mental health. CI=confidence interval; N=sample size; NR=not reported; OR=odds ratio; p=p-value; Ref=reference. BMI=body mass index; CI=confidence interval; COPD=Chronic obstructive pulmonary disease; N=sample size; NA=not available; NR=not reported; OR=odds ratio; p=p-value; Ref=reference; SD=standard deviation

**Supplementary Table 7-A. Risk of Bias Assessment for Non-Randomized Studies.**

| Author, year              | Domain 1: Confounding | Domain 2: Patient Selection | Domain 3: Classifying Interventions | Domain 4: Deviations from intended interventions | Domain 5: Missing data | Domain 6: Measurement of outcomes | Domain 7: Selection of reported results | Overall Assessment |
|---------------------------|-----------------------|-----------------------------|-------------------------------------|--------------------------------------------------|------------------------|-----------------------------------|-----------------------------------------|--------------------|
| Adams, 2023(1)            | Serious               | Moderate                    | Low                                 | No information                                   | Low                    | Low                               | Moderate                                | Serious            |
| Adepoju, 2022(2)          | Moderate              | Low                         | Low                                 | No information                                   | Moderate               | Low                               | Low                                     | Moderate           |
| Afonso Nogueira, 2021(3)  | Critical              | Low                         | Low                                 | Low                                              | Low                    | Low                               | Low                                     | Serious            |
| Aiken, 2021(4)            | Moderate              | Moderate                    | Low                                 | Moderate                                         | Low                    | Low                               | Low                                     | Moderate           |
| Arias, 2022(5)            | Low                   | Low                         | Low                                 | Low                                              | Low                    | Low                               | Low                                     | Low                |
| Barequet, 2021(6)         | Serious               | No information              | Low                                 | Low                                              | Low                    | Low                               | Low                                     | Serious            |
| Baughman, 2021(7)         | Low                   | Low                         | Low                                 | Low                                              | Moderate               | Low                               | Low                                     | Moderate           |
| Borgen, 2021(8)           | Moderate              | Low                         | Low                                 | Low                                              | Low                    | Low                               | Low                                     | Moderate           |
| Boshara, 2022(9)          | Low                   | No information              | Low                                 | Low                                              | Low                    | No information                    | Low                                     | Moderate           |
| Bryson, 2023(10)          | Moderate              | Low                         | Moderate                            | No information                                   | Moderate               | Low                               | Moderate                                | Moderate           |
| Carlberg, 2020(11)        | Serious               | Moderate                    | Low                                 | Low                                              | Low                    | Low                               | Low                                     | Serious            |
| Casariago-Vales, 2021(12) | Serious               | Serious                     | Low                                 | Serious                                          | Moderate               | Moderate                          | Low                                     | Serious            |
| Chen, 2023(13)            | Moderate              | Low                         | Low                                 | No information                                   | Low                    | Low                               | Low                                     | Moderate           |
| Clark, 2022(14)           | Serious               | Moderate                    | Low                                 | No information                                   | No information         | Low                               | Low                                     | Serious            |
| Cobo-Calvo, 2022(15)      | Critical              | Moderate                    | Low                                 | Low                                              | Low                    | Low                               | Low                                     | Serious            |
| Cunningham, 2022(16)      | Critical              | Low                         | Low                                 | Moderate                                         | No information         | Low                               | Low                                     | Serious            |
| Cvietusa, 2022(17)        | Low                   | Low                         | Low                                 | Low                                              | Low                    | Low                               | Low                                     | Low                |
| D'Anna, 2021(18)          | Critical              | Moderate                    | Low                                 | Low                                              | Low                    | Low                               | Low                                     | Serious            |
| Duryea, 2021(19)          | Moderate              | Low                         | Low                                 | Low                                              | Low                    | Low                               | Low                                     | Serious            |
| Fortier, 2022(20)         | Serious               | Low                         | Low                                 | Low                                              | Low                    | Serious                           | Low                                     | Serious            |
| Fredwall, 2021(21)        | Serious               | Low                         | Low                                 | Low                                              | Moderate               | Low                               | Low                                     | Serious            |
| Frost, 2022(22)           | Moderate              | Low                         | Moderate                            | No information                                   | Low                    | Low                               | Low                                     | Moderate           |
| Gaetani, 2021(23)         | Moderate              | Moderate                    | Low                                 | Moderate                                         | Low                    | Moderate                          | Low                                     | Moderate           |
| Gainer, 2023(24)          | Moderate              | Low                         | Moderate                            | Low                                              | Moderate               | Low                               | Moderate                                | Moderate           |
| Gao, 2022(25)             | Serious               | Low                         | Low                                 | No information                                   | Low                    | Low                               | Low                                     | Serious            |
| Garmendia, 2021(26)       | Low                   | Serious                     | Low                                 | No information                                   | Low                    | Low                               | Low                                     | Moderate           |

| Author, year         | Domain 1: Confounding | Domain 2: Patient Selection | Domain 3: Classifying Interventions | Domain 4: Deviations from intended interventions | Domain 5: Missing data | Domain 6: Measurement of outcomes | Domain 7: Selection of reported results | Overall Assessment |
|----------------------|-----------------------|-----------------------------|-------------------------------------|--------------------------------------------------|------------------------|-----------------------------------|-----------------------------------------|--------------------|
| Hatef, 2022(28)      | Low                   | Low                         | Low                                 | Low                                              | Low                    | Low                               | Low                                     | Low                |
| Hughes, 2022(29)     | Serious               | Low                         | Low                                 | No information                                   | No information         | Serious                           | Low                                     | Serious            |
| Jazayeri, 2022(30)   | Serious               | Low                         | Moderate                            | No information                                   | Serious                | Serious                           | Moderate                                | Serious            |
| Kablinger, 2022(31)  | Low                   | No information              | Low                                 | Low                                              | Low                    | Low                               | Low                                     | Moderate           |
| Kerestes, 2021(32)   | Moderate              | Low                         | Low                                 | Low                                              | Moderate               | Moderate                          | Moderate                                | Moderate           |
| Khosla, 2022(33)     | Low                   | Low                         | Low                                 | Low                                              | Low                    | Low                               | Low                                     | Low                |
| Klain, 2021(34)      | Serious               | Low                         | Low                                 | Low                                              | Low                    | Low                               | Low                                     | Serious            |
| Kolb, 2021(35)       | Serious               | Low                         | Serious                             | Low                                              | Low                    | Low                               | Low                                     | Serious            |
| Korycinski, 2022(36) | Moderate              | Low                         | Low                                 | Low                                              | No information         | Low                               | Low                                     | Moderate           |
| Levinson, 2021(37)   | Serious               | Serious                     | Low                                 | Serious                                          | Moderate               | Low                               | Low                                     | Serious            |
| Li, 2021(38)         | Serious               | Serious                     | Moderate                            | Low                                              | Low                    | Moderate                          | Low                                     | Serious            |
| Lindhagen, 2022(39)  | Critical              | Low                         | Low                                 | Low                                              | Low                    | Low                               | Low                                     | Serious            |
| Liou, 2022(40)       | Low                   | Moderate                    | Low                                 | No information                                   | Moderate               | Low                               | Low                                     | Moderate           |
| Liu, 2021(41)        | Serious               | Moderate                    | Low                                 | Low                                              | Critical               | Low                               | Low                                     | Serious            |
| Mair, 2021(42)       | Low                   | Serious                     | Low                                 | No information                                   | Low                    | Low                               | Low                                     | Moderate           |
| Mathews, 2022(43)    | Serious               | Moderate                    | Low                                 | No information                                   | Low                    | Low                               | Low                                     | Serious            |
| McNamara, 2021(45)   | Moderate              | Low                         | Low                                 | Low                                              | Low                    | Low                               | Low                                     | Moderate           |
| McCoy, 2022(44)      | Critical              | Low                         | Low                                 | Low                                              | Low                    | Low                               | Low                                     | Serious            |
| Metcalfe, 2023(46)   | Serious               | Low                         | Moderate                            | No information                                   | Low                    | Moderate                          | Low                                     | Serious            |
| Minsky, 2021(47)     | Serious               | Low                         | Low                                 | Low                                              | Serious                | Low                               | Low                                     | Serious            |
| Offiah, 2022(49)     | Critical              | No information              | Low                                 | Serious                                          | Low                    | Low                               | Low                                     | Serious            |
| Ostberg, 2022(50)    | Low                   | Serious                     | Low                                 | Low                                              | Low                    | Low                               | Low                                     | Serious            |
| Parise, 2021(51)     | Serious               | Low                         | Low                                 | Low                                              | Serious                | Low                               | Low                                     | Serious            |
| Phillips, 2021(52)   | Moderate              | Low                         | Serious                             | Low                                              | Low                    | Moderate                          | Low                                     | Serious            |
| Piga, 2022(53)       | Low                   | Serious                     | Low                                 | No information                                   | Low                    | Serious                           | Low                                     | Serious            |
| Pinsker, 2021(54)    | Serious               | Low                         | Low                                 | Low                                              | Low                    | Low                               | Moderate                                | Serious            |

| Author, year        | Domain 1: Confounding | Domain 2: Patient Selection | Domain 3: Classifying Interventions | Domain 4: Deviations from intended interventions | Domain 5: Missing data | Domain 6: Measurement of outcomes | Domain 7: Selection of reported results | Overall Assessment |
|---------------------|-----------------------|-----------------------------|-------------------------------------|--------------------------------------------------|------------------------|-----------------------------------|-----------------------------------------|--------------------|
| Reddy, 2021(56)     | Critical              | Low                         | Low                                 | Low                                              | No information         | Low                               | Low                                     | Serious            |
| Rene, 2022(57)      | Low                   | Moderate                    | Low                                 | No information                                   | Low                    | Low                               | Low                                     | Serious            |
| Ripp, 2022(58)      | Low                   | Low                         | Low                                 | Low                                              | Low                    | Low                               | Low                                     | Low                |
| Rowe, 2021(59)      | Moderate              | Low                         | Serious                             | Low                                              | Low                    | Low                               | Low                                     | Serious            |
| Ryskina, 2021(60)   | Moderate              | Low                         | Moderate                            | Low                                              | Low                    | Low                               | Low                                     | Moderate           |
| Severino, 2022(61)  | Low                   | Moderate                    | Serious                             | No information                                   | Moderate               | Low                               | Low                                     | Serious            |
| Sevilis, 2022(62)   | Critical              | Low                         | Low                                 | Low                                              | Low                    | Low                               | Serious                                 | Critical           |
| Shah, 2022(63)      | Moderate              | Low                         | Low                                 | No information                                   | Moderate               | Serious                           | Low                                     | Moderate           |
| Sharma, 2020(64)    | Serious               | Serious                     | Low                                 | Low                                              | Low                    | Moderate                          | Low                                     | Serious            |
| Sohail, 2023(65)    | Low                   | Moderate                    | Low                                 | No information                                   | Moderate               | Moderate                          | Low                                     | Moderate           |
| Sun, 2022(66)       | Moderate              | Low                         | Low                                 | No information                                   | Moderate               | Low                               | Moderate                                | Moderate           |
| Szigety, 2022(67)   | Serious               | Moderate                    | Low                                 | No information                                   | No information         | Low                               | Low                                     | Serious            |
| Tarn, 2021(68)      | Serious               | Low                         | Low                                 | Low                                              | Low                    | Low                               | Low                                     | Serious            |
| Tchang, 2022(69)    | Critical              | Low                         | Low                                 | Low                                              | Moderate               | Low                               | Low                                     | Serious            |
| Wabe, 2022(70)      | Low                   | Low                         | Low                                 | Low                                              | Low                    | Low                               | Low                                     | Low                |
| Walker, 2023(71)    | Low                   | Low                         | Low                                 | No information                                   | Critical               | Low                               | Serious                                 | Serious            |
| Watson, 2021(72)    | Critical              | Low                         | Low                                 | Low                                              | Low                    | Low                               | Low                                     | Serious            |
| Ye, 2022(73)        | Low                   | Low                         | Low                                 | Low                                              | Low                    | Low                               | Low                                     | Low                |
| Zayde, 2021(74)     | Serious               | Low                         | Low                                 | Low                                              | Low                    | Low                               | Low                                     | Serious            |
| Zhao, 2021(75)      | Low                   | Moderate                    | Low                                 | Low                                              | Low                    | Low                               | Low                                     | Moderate           |
| Zhu, 2021(76)       | Serious               | Moderate                    | Low                                 | Low                                              | Moderate               | Moderate                          | Low                                     | Serious            |
| Zimmerman, 2021(77) | Serious               | Low                         | Low                                 | Low                                              | Moderate               | Serious                           | Low                                     | Serious            |

**Supplementary Table 7-B. Risk of Bias Assessment for Randomized Controlled Trials.**

| Author, year        | Domain 1:<br>Randomization<br>process | Domain 2:<br>Deviations<br>intended<br>interventions<br>(effect of<br>assignment to<br>intervention) | Domain 2:<br>Deviations<br>intended<br>interventions<br>(effect of<br>adhering to<br>intervention) | Domain 3:<br>Missing outcome<br>data | Domain 4:<br>Measurement of the<br>outcome | Domain 5:<br>Selection of the<br>reported result | Overall<br>Assessment |
|---------------------|---------------------------------------|------------------------------------------------------------------------------------------------------|----------------------------------------------------------------------------------------------------|--------------------------------------|--------------------------------------------|--------------------------------------------------|-----------------------|
| Griebeler, 2022(27) | High risk                             | Low risk                                                                                             | Low risk                                                                                           | Some concerns                        | Low risk                                   | Low risk                                         | High risk             |
| Mossack, 2022(48)   | Low risk                              | Low risk                                                                                             | High risk                                                                                          | Low risk                             | Some concerns                              | Low risk                                         | High risk             |
| Prato, 2022(55)     | Low risk                              | Some concerns                                                                                        | High risk                                                                                          | Low risk                             | High risk                                  | Low risk                                         | High risk             |



**Supplementary Table 8. Summary of Findings for Outcomes of Care Among Patients Receiving Telehealth Versus In-person Care During COVID-19.**

| Clinical area                                                       | Number of Studies and Sample Size (N)                                                                    | The Direction of Findings (Sample Size)     |                                    |                                                       | Conclusion*                                                                                                                                                                                                                                                                                                                                                                                  | Strength of Evidence                                                             |
|---------------------------------------------------------------------|----------------------------------------------------------------------------------------------------------|---------------------------------------------|------------------------------------|-------------------------------------------------------|----------------------------------------------------------------------------------------------------------------------------------------------------------------------------------------------------------------------------------------------------------------------------------------------------------------------------------------------------------------------------------------------|----------------------------------------------------------------------------------|
|                                                                     |                                                                                                          | Favors In-person                            | No Difference/ Unclear             | Favors Telehealth                                     |                                                                                                                                                                                                                                                                                                                                                                                              |                                                                                  |
| <b>Healthcare Utilization Outcomes</b>                              |                                                                                                          |                                             |                                    |                                                       |                                                                                                                                                                                                                                                                                                                                                                                              |                                                                                  |
| <b>Emergency Department Visits (N=14 Studies)</b>                   |                                                                                                          |                                             |                                    |                                                       |                                                                                                                                                                                                                                                                                                                                                                                              |                                                                                  |
| General medical care, Adults                                        | 1 study (16,987)<br>- Cohort<br>1 study(63)<br>(N=16,987)                                                | Cohort<br>1 study(63)<br>(N=16,987)         |                                    |                                                       | For adult patients who receive care for general medical conditions, those who receive an initial telehealth visit have higher rates of ED visits compared with those who receive in-person care.                                                                                                                                                                                             | High<br>Direct<br>Imprecise<br>Unknown Consistency<br>Undetected<br>Overall: Low |
| General medical care, Child                                         | 1 study (1,769)<br>- Cohort<br>Cohort<br>1 study(30) (N=1,769)                                           |                                             | Cohort<br>1 study(30)<br>(N=1,769) |                                                       | For children who receive care for general medical conditions, those who receive an initial telehealth visit have the same rates of ED visits compared with those who receive in-person care.                                                                                                                                                                                                 | High<br>Direct<br>Imprecise<br>Unknown Consistency<br>Undetected<br>Overall: Low |
| General medical care, All ages                                      | 2 studies (N=608,878)<br>- Cohort<br>2 studies (28, 52)<br>(N=608,878)                                   | Cohort<br>2 studies (28, 52)<br>(N=608,878) |                                    | Cohort<br>1 study(28)<br>(N=607,573)                  | For patients of all ages who receive care for general medical conditions, those who receive an initial telehealth visit for an acute condition may have higher rates of ED visits compared with those who receive in-person care and those who receive an initial telehealth visit for a chronic condition may have lower rates of ED visits compared with those who receive in-person care. | Medium<br>Direct<br>Precise<br>Inconsistent<br>Undetected<br>Overall: Moderate   |
| Care for specific conditions, COVID-19                              | 3 studies (N=5,462)<br>- Cohort<br>3 studies(8, 12, 36)<br>(N=5,462)                                     | Cohort<br>1 study(12)<br>(N=4,384)          |                                    | Cohort<br>2 studies(8, 36) (N=1,078)                  | For patients who receive specialized COVID-19 care, those who receive an initial telehealth visit may have higher ED visit rates compared with those who receive in-person care.                                                                                                                                                                                                             | High<br>Direct<br>Precise<br>Inconsistent<br>Undetected<br>Overall: Low          |
| Care for specific conditions, Pregnancy/prenatal/gynecological care | 1 study (N=287)<br>- Cohort<br>1 study(32) (N=287)                                                       | Cohort<br>1 study(32)<br>(N=287)            |                                    |                                                       | For women who receive specialized pregnancy/prenatal/gynecological care, those who receive an initial telehealth visit may have higher ED visit rates compared with those who receive in-person.                                                                                                                                                                                             | High<br>Direct<br>Imprecise<br>Unknown consistency<br>Undetected<br>Overall: Low |
| Care for specific conditions, Other conditions                      | 6 studies (N=11,546)<br>- Cohort<br>5 studies (3, 17, 23, 56, 71, 72)<br>(N=41,496)<br>- Cross-sectional | Cross-sectional<br>1 study(72)<br>(N=1,724) |                                    | Cohort<br>5 studies (3, 17, 23, 56, 71)<br>(N=41,496) | For patients who receive care for specific conditions (excluding COVID-19 and pregnancy/prenatal/gynecological care), those who receive an initial telehealth visit may have lower ED                                                                                                                                                                                                        | High<br>Direct<br>Precise<br>Consistent<br>Suspected<br>Overall: Low             |

| Clinical area                                                       | Number of Studies and Sample Size (N)                                                                                                               | The Direction of Findings (Sample Size)                                                       |                       |                                                              | Conclusion*                                                                                                                                                                                                                                                                                                                                                                                        | Strength of Evidence                                                           |
|---------------------------------------------------------------------|-----------------------------------------------------------------------------------------------------------------------------------------------------|-----------------------------------------------------------------------------------------------|-----------------------|--------------------------------------------------------------|----------------------------------------------------------------------------------------------------------------------------------------------------------------------------------------------------------------------------------------------------------------------------------------------------------------------------------------------------------------------------------------------------|--------------------------------------------------------------------------------|
|                                                                     |                                                                                                                                                     | Favors In-person                                                                              | No Difference/Unclear | Favors Telehealth                                            |                                                                                                                                                                                                                                                                                                                                                                                                    |                                                                                |
|                                                                     | 1 study(72)<br>(N=1,724)                                                                                                                            |                                                                                               |                       |                                                              | visit rates compared with those who receive in-person.                                                                                                                                                                                                                                                                                                                                             |                                                                                |
| General behavioral/Mental health                                    | No studies                                                                                                                                          |                                                                                               |                       |                                                              |                                                                                                                                                                                                                                                                                                                                                                                                    |                                                                                |
| <b>Hospitalization (N=20 Studies)</b>                               |                                                                                                                                                     |                                                                                               |                       |                                                              |                                                                                                                                                                                                                                                                                                                                                                                                    |                                                                                |
| General medical care, Adult                                         | 3 studies (N=17,517)<br>- Cohort<br>3 studies (60, 63, 77)<br>(N=34,504)                                                                            | Cohort<br>1 study(63)<br>(N=16,987)                                                           |                       | Cohort<br>2 studies(60, 77)<br>(N=17,517)                    | For adult patients who receive care for general medical conditions, hospitalization rates may be similar for those receiving an initial telehealth visit compared with those who receive an initial in-person visit.                                                                                                                                                                               | High<br>Direct<br>Precise<br>Inconsistent<br>Undetected<br>Overall: Moderate   |
| General medical care, Child                                         | No studies                                                                                                                                          |                                                                                               |                       |                                                              |                                                                                                                                                                                                                                                                                                                                                                                                    |                                                                                |
| General medical care, All ages                                      | 2 studies (N=608,878)<br>- Cohort<br>2 studies (28, 52)<br>(N=608,878)                                                                              | Cohort<br>1 study(28)<br>(N=607,573)                                                          |                       | Cohort<br>2 studies (28, 52)<br>(N=608,878)                  | For patients of all ages who receive care for general medical conditions, those who receive an initial telehealth visit for an acute condition may have higher hospitalization rates compared with those who receive in-person care and those who receive an initial telehealth visit for a chronic condition may have lower hospitalization rates compared with those who receive in-person care. | Medium<br>Direct<br>Precise<br>Inconsistent<br>Undetected<br>Overall: Moderate |
| Care for specific conditions, COVID-19                              | 2 studies (N=4,677)<br>- Cohort<br>2 studies (12, 36)<br>(N=4,677)                                                                                  | Cohort<br>1 study(12)<br>(N=4,384)                                                            |                       | Cohort<br>1 study(36)<br>(N=293)                             | For patients who receive specialized COVID-19 care, those who receive an initial telehealth visit may have higher hospitalization rates compared with those who receive in-person care.                                                                                                                                                                                                            | High<br>Direct<br>Precise<br>Inconsistent<br>Undetected<br>Overall: Low        |
| Care for specific conditions, Pregnancy/prenatal/gynecological care | 2 studies (N=14,186)<br>- Cohort<br>2 studies (5, 19)<br>(N=14,186)                                                                                 | Cohort<br>2 studies (5, 19)<br>(N=14,186)                                                     |                       |                                                              | For women who receive specialized pregnancy/prenatal/gynecological care, those who receive an initial telehealth visit may have slightly higher hospitalization rates compared with those who receive in-person care.                                                                                                                                                                              | High<br>Direct<br>Precise<br>Consistent<br>Undetected<br>Overall: Low          |
| Care for specific conditions, Other conditions                      | 11 studies (N=73,358)<br>- Cohort<br>10 studies (3, 17, 18, 50, 61, 62, 64, 71, 75, 76) (N=71,634)<br>- Cross-sectional<br>1 study(72)<br>(N=1,724) | Cohort<br>3 studies (50, 62, 75)<br>(N=27,323)<br>Cross-sectional<br>1 study(72)<br>(N=1,724) |                       | Cohort<br>7 studies(3, 17, 18, 61, 64, 71, 76)<br>(N=44,311) | For patients who receive care for specific conditions (excluding COVID-19 and pregnancy/prenatal/gynecological care), those who receive an initial telehealth visit may have lower hospitalization rates compared with those who receive in-person care.                                                                                                                                           | High<br>Direct<br>Precise<br>Inconsistent<br>Suspected<br>Overall: Low         |

| Clinical area                                                       | Number of Studies and Sample Size (N)                                                                  | The Direction of Findings (Sample Size) |                                             |                                                         | Conclusion*                                                                                                                                                                                                                                          | Strength of Evidence                                                             |
|---------------------------------------------------------------------|--------------------------------------------------------------------------------------------------------|-----------------------------------------|---------------------------------------------|---------------------------------------------------------|------------------------------------------------------------------------------------------------------------------------------------------------------------------------------------------------------------------------------------------------------|----------------------------------------------------------------------------------|
|                                                                     |                                                                                                        | Favors In-person                        | No Difference/Unclear                       | Favors Telehealth                                       |                                                                                                                                                                                                                                                      |                                                                                  |
| General Behavioral/Mental Health                                    | No studies                                                                                             |                                         |                                             |                                                         |                                                                                                                                                                                                                                                      |                                                                                  |
| <b>Readmission (N=4 Studies)</b>                                    |                                                                                                        |                                         |                                             |                                                         |                                                                                                                                                                                                                                                      |                                                                                  |
| General medical care, Adult                                         | No studies                                                                                             |                                         |                                             |                                                         |                                                                                                                                                                                                                                                      |                                                                                  |
| General medical care, Child                                         | No studies                                                                                             |                                         |                                             |                                                         |                                                                                                                                                                                                                                                      |                                                                                  |
| General medical care, All ages                                      | No studies                                                                                             |                                         |                                             |                                                         |                                                                                                                                                                                                                                                      |                                                                                  |
| Care for specific conditions, COVID-19                              | 2 studies (N=992)<br>- Cohort<br>2 studies (8, 11)<br>(N=992)                                          |                                         |                                             | Cohort<br>2 studies(8, 11)<br>(N=992)                   | For patients who receive specialized COVID-19 care, those who receive an initial telehealth visit may have similar readmission rates compared with those who receive in-person care.                                                                 | High<br>Direct<br>Precise<br>Consistent<br>Undetected<br>Overall: Low            |
| Care for specific conditions, Pregnancy/prenatal/gynecological care | 1 study (N=473)<br>- Cohort<br>1 study(33) (N=473)                                                     |                                         |                                             | Cohort<br>1 study(33)<br>(N=473)                        | For women who receive pregnancy/prenatal/gynecological care, readmission rates may be similar for those receiving telehealth compared with those who receive in-person care.                                                                         | Medium<br>Direct<br>Precise<br>Unknown consistency<br>Undetected<br>Overall: Low |
| Care for specific conditions, Other conditions                      | 1 study (N= 146)<br>- Cohort<br>1 study(29) (N= 146)                                                   |                                         |                                             | 1 study (N= 146)<br>- Cohort<br>1 study(29)<br>(N= 146) | For patients who receive care for specific conditions (excluding COVID-19 and pregnancy/prenatal/gynecological care), those who receive an initial telehealth visit may have lower readmission rates compared with those who receive in-person care. | High<br>Direct<br>Precise<br>Unknown consistency<br>Undetected<br>Overall: Low   |
| General behavioral/Mental health                                    | No studies                                                                                             |                                         |                                             |                                                         |                                                                                                                                                                                                                                                      |                                                                                  |
| <b>Clinical Outcomes</b>                                            |                                                                                                        |                                         |                                             |                                                         |                                                                                                                                                                                                                                                      |                                                                                  |
| <b>Mortality (N=6 Studies)</b>                                      |                                                                                                        |                                         |                                             |                                                         |                                                                                                                                                                                                                                                      |                                                                                  |
| General medical care, Adult                                         | No studies                                                                                             |                                         |                                             |                                                         |                                                                                                                                                                                                                                                      |                                                                                  |
| General medical care, Child                                         | No studies                                                                                             |                                         |                                             |                                                         |                                                                                                                                                                                                                                                      |                                                                                  |
| General medical care, All ages                                      | No studies                                                                                             |                                         |                                             |                                                         |                                                                                                                                                                                                                                                      |                                                                                  |
| Care for specific conditions, COVID-19                              | No studies                                                                                             |                                         |                                             |                                                         |                                                                                                                                                                                                                                                      |                                                                                  |
| Care for specific conditions, Pregnancy/prenatal/gynecological care | 2 studies (N=53,721)<br>- Cohort<br>1 study(5) (N=1,579)<br>- Cross-sectional<br>1 study(4) (N=52,142) | Cohort<br>1 study(5)<br>(N=1,579)       | Cross-sectional<br>1 study(4)<br>(N=52,142) |                                                         | For women who receive specialized pregnancy/prenatal/gynecological care, those who receive an initial telehealth visit may have similar mortality rates compared with those who receive in-person care.                                              | High<br>Direct<br>Precise<br>Consistent<br>Undetected<br>Overall: Low            |
| Care for specific conditions, Other conditions                      | 4 studies (N=2,193)<br>- Cohort<br>3 studies(3, 61, 75)<br>(N=469)                                     |                                         |                                             | Cohort<br>3 studies(3, 61, 75)<br>(N=469)               | For patients who receive care for specific conditions (excluding COVID-19 and pregnancy/prenatal/gynecological                                                                                                                                       | High<br>Direct<br>Precise<br>Consistent                                          |

| Clinical area                                                       | Number of Studies and Sample Size (N)                                         | The Direction of Findings (Sample Size)             |                                  |                                             | Conclusion*                                                                                                                                                                                                                                                   | Strength of Evidence                                                           |
|---------------------------------------------------------------------|-------------------------------------------------------------------------------|-----------------------------------------------------|----------------------------------|---------------------------------------------|---------------------------------------------------------------------------------------------------------------------------------------------------------------------------------------------------------------------------------------------------------------|--------------------------------------------------------------------------------|
|                                                                     |                                                                               | Favors In-person                                    | No Difference/Unclear            | Favors Telehealth                           |                                                                                                                                                                                                                                                               |                                                                                |
|                                                                     | - Cross-sectional<br>1 study(72) (N=1,724)                                    |                                                     |                                  | Cross-sectional<br>1 study(72)<br>(N=1,724) | care), those who receive an initial telehealth visit may have lower mortality rates compared with those who receive in-person care.                                                                                                                           | Undetected<br>Overall: Low                                                     |
| General behavioral/Mental health                                    | No studies                                                                    |                                                     |                                  |                                             |                                                                                                                                                                                                                                                               |                                                                                |
| <b>Patient-Reported Outcome (N=8 Studies)</b>                       |                                                                               |                                                     |                                  |                                             |                                                                                                                                                                                                                                                               |                                                                                |
| General medical care, Adult                                         | No studies                                                                    |                                                     |                                  |                                             |                                                                                                                                                                                                                                                               |                                                                                |
| General medical care, Child                                         | No studies                                                                    |                                                     |                                  |                                             |                                                                                                                                                                                                                                                               |                                                                                |
| General medical care, All ages                                      | No studies                                                                    |                                                     |                                  |                                             |                                                                                                                                                                                                                                                               |                                                                                |
| Care for specific conditions, COVID-19                              | No studies                                                                    |                                                     |                                  |                                             |                                                                                                                                                                                                                                                               |                                                                                |
| Care for specific conditions, Pregnancy/prenatal/gynecological care | 2 studies (N=2,005)<br>- Cohort<br>2 studies(5, 10)<br>(N=2,005)              | Cohort<br>1 study(5)<br>(N=1,579)                   |                                  | Cohort<br>1 study<br>(10)<br>(N=426)        | For women who receive specialized pregnancy/prenatal/gynecological care, those who receive an initial telehealth visit may have worse patient-reported outcomes compared with those who receive in-person care.                                               | High<br>Direct<br>Precise<br>Inconsistent<br>Undetected<br>Overall: Low        |
| Care for specific conditions, Other conditions                      | 1 study (N=279)<br>- Cohort<br>1 study(47) (N=279)                            |                                                     |                                  | Cohort<br>1 study(47)<br>(N=279)            | For patients who receive care for specific conditions (excluding COVID-19 and pregnancy/prenatal/gynecological care), those who receive an initial telehealth visit may have better patient-reported outcomes compared with those who receive in-person care. | High<br>Direct<br>Precise<br>Unknown consistency<br>Undetected<br>Overall: Low |
| General behavioral/Mental health                                    | 5 studies (N=1,079)<br>- Cohort<br>5 studies(31, 37, 41, 57, 74)<br>(N=1,079) | Cohort<br>1 study(37)<br>(N=93)                     | Cohort<br>1 study(57)<br>(N=338) | Cohort<br>3 studies(31, 41, 74)<br>(N=648)  | For patients receiving care for general behavioral and mental health conditions, those who receive an initial telehealth visit may have better patient-reported outcomes compared with those who receive in-person care.                                      | High<br>Direct<br>Precise<br>Inconsistent<br>Undetected<br>Overall: Low        |
| <b>Condition-Specific Clinical Outcomes (N=15 Studies)</b>          |                                                                               |                                                     |                                  |                                             |                                                                                                                                                                                                                                                               |                                                                                |
| General medical care, Adult                                         | 1 study (N=70)<br>- RCT<br>1 study(27) (N=70)                                 | 1 study<br>(N=70)<br>- RCT<br>1 study(27)<br>(N=70) |                                  |                                             | For adult patients who receive care for general medical conditions, those who receive an initial telehealth visit may have worse clinical outcomes compared with those who receive in-person care.                                                            | High<br>Direct<br>Precise<br>Unknown consistency<br>Undetected<br>Overall: Low |
| General medical care, Child                                         | No studies                                                                    |                                                     |                                  |                                             |                                                                                                                                                                                                                                                               |                                                                                |
| General medical care, All ages                                      | No studies                                                                    |                                                     |                                  |                                             |                                                                                                                                                                                                                                                               |                                                                                |

| Clinical area                                                       | Number of Studies and Sample Size (N)                                                                                    | The Direction of Findings (Sample Size)                                          |                                    |                                                      | Conclusion*                                                                                                                                                                                                                                                                       | Strength of Evidence                                                           |
|---------------------------------------------------------------------|--------------------------------------------------------------------------------------------------------------------------|----------------------------------------------------------------------------------|------------------------------------|------------------------------------------------------|-----------------------------------------------------------------------------------------------------------------------------------------------------------------------------------------------------------------------------------------------------------------------------------|--------------------------------------------------------------------------------|
|                                                                     |                                                                                                                          | Favors In-person                                                                 | No Difference/Unclear              | Favors Telehealth                                    |                                                                                                                                                                                                                                                                                   |                                                                                |
| Care for specific conditions, COVID-19                              | No studies                                                                                                               |                                                                                  |                                    |                                                      |                                                                                                                                                                                                                                                                                   |                                                                                |
| Care for specific conditions, Pregnancy/prenatal/gynecological care | 4 studies (N=56,100)<br>- Cohort<br>2 studies(5, 14)<br>(N=2,082)<br>- Cross-sectional<br>2 studies(4, 25)<br>(N=54,018) | Cohort<br>1 study(5)<br>(N=1,579)<br>Cross-sectional<br>1 study(25)<br>(N=1,876) | - Cohort<br>1 study(14)<br>(N=503) | Cross-sectional<br>1 study(4)<br>(N=52,142)          | For women who receive specialized pregnancy/prenatal/gynecological care, those who receive an initial telehealth visit may have worse condition-specific clinical outcomes compared with those who receive in-person care.                                                        | High<br>Direct<br>Imprecise<br>Inconsistent<br>Undetected<br>Overall: Low      |
| Care for specific conditions, Other conditions                      | 8 studies (N=73,581)<br>- Cohort<br>8 studies(6, 17, 21, 42, 47, 69, 71, 73)<br>(N=73,581)                               | Cohort<br>4 studies(6, 17, 71, 73)<br>(N=72,390)                                 |                                    | Cohort<br>4 studies(21, 42, 47, 69)<br>(N=1,191)     | For patients who receive care for specific conditions (excluding COVID-19 and pregnancy/prenatal/gynecological care), those who receive an initial telehealth visit may have worse condition-specific clinical outcomes compared with those who receive in-person care (SOE: Low) | High<br>Direct<br>Precise<br>Inconsistent<br>Undetected<br>Overall: Low        |
| General behavioral/Mental health                                    | 2 studies (N=133)<br>- Cohort<br>1 study(37) (N=93)<br><br>- RCT<br>1 study(55) (N=40)                                   |                                                                                  | - RCT<br>1 study(55)<br>(N=40)     | Cohort<br>1 study<br>Levinson,<br>2021(37)<br>(N=93) | For patients receiving care for general behavioral and mental health conditions, those who receive an initial telehealth visit may have better condition-specific clinical outcomes compared with those who receive in-person care.                                               | High<br>Direct<br>Precise<br>Inconsistent<br>Undetected<br>Overall: Low        |
| <b>Adverse Events (N=7 Studies)</b>                                 |                                                                                                                          |                                                                                  |                                    |                                                      |                                                                                                                                                                                                                                                                                   |                                                                                |
| General medical care, Adult                                         | 1 study (N=492)<br>- Cohort<br>1 study(45) (N=492)                                                                       |                                                                                  |                                    | Cohort<br>1 study(45)<br>(N=492)                     | For adult patients receiving general medical conditions, patients who receive an initial telehealth visit may have slightly lower adverse event rates compared with those who receive in-person care.                                                                             | High<br>Direct<br>Precise<br>Unknown consistency<br>Undetected<br>Overall: Low |
| General medical care, Child                                         | No studies                                                                                                               |                                                                                  |                                    |                                                      |                                                                                                                                                                                                                                                                                   |                                                                                |
| General medical care, All ages                                      | No studies                                                                                                               |                                                                                  |                                    |                                                      |                                                                                                                                                                                                                                                                                   |                                                                                |
| Care for specific conditions, COVID-19                              | No studies                                                                                                               |                                                                                  |                                    |                                                      |                                                                                                                                                                                                                                                                                   |                                                                                |
| Care for specific conditions, Pregnancy/prenatal/gynecological care | 3 studies (N=65,036)<br>- Cohort<br>3 studies(4, 19, 32)<br>(N=65,036)                                                   | Cohort<br>1 study(32)<br>(N=287)                                                 |                                    | Cohort<br>2 (4, 19)<br>(N=64,749)                    | For women who receive specialized pregnancy/prenatal/gynecological care, those who receive an initial telehealth visit may have slightly lower adverse event rates compared with those who receive in-person care.                                                                | High<br>Direct<br>Precise<br>Consistent<br>Undetected<br>Overall: Low          |
| Care for specific conditions, Other conditions                      | 2 studies (N=23,452)<br>- Cohort                                                                                         |                                                                                  |                                    | Cohort<br>2 studies(54, 61) (N=23,452)               | For patients who receive care for specific conditions (excluding COVID-19 and                                                                                                                                                                                                     | High<br>Direct<br>Precise                                                      |

| Clinical area                                                       | Number of Studies and Sample Size (N)                                                                                      | The Direction of Findings (Sample Size)       |                                 |                                                                                           | Conclusion*                                                                                                                                                                                                                                           | Strength of Evidence                                                             |
|---------------------------------------------------------------------|----------------------------------------------------------------------------------------------------------------------------|-----------------------------------------------|---------------------------------|-------------------------------------------------------------------------------------------|-------------------------------------------------------------------------------------------------------------------------------------------------------------------------------------------------------------------------------------------------------|----------------------------------------------------------------------------------|
|                                                                     |                                                                                                                            | Favors In-person                              | No Difference/Unclear           | Favors Telehealth                                                                         |                                                                                                                                                                                                                                                       |                                                                                  |
|                                                                     | 2 studies(54, 61)<br>(N=23,452)                                                                                            |                                               |                                 |                                                                                           | pregnancy/prenatal/gynecological care), those who receive an initial telehealth visit may have a slightly lower adverse events rate compared with those who receive in-person care.                                                                   | Consistent<br>Undetected<br>Overall: Low                                         |
| General behavioral/Mental health                                    | 1 study (N=74)<br>- Cohort<br>1 study(20) (N=74)                                                                           |                                               | Cohort<br>1 study(20)<br>(N=74) | NA                                                                                        | For patients receiving care for general behavioral and mental health conditions, those who receive an initial telehealth visit may have similar rates of adverse events compared with those who receive in-person care.                               | High<br>Direct<br>Imprecise<br>Unknown consistency<br>Undetected<br>Overall: Low |
| <b>Process Outcomes</b>                                             |                                                                                                                            |                                               |                                 |                                                                                           |                                                                                                                                                                                                                                                       |                                                                                  |
| <b>Missed Visits (N=14 Studies)</b>                                 |                                                                                                                            |                                               |                                 |                                                                                           |                                                                                                                                                                                                                                                       |                                                                                  |
| General medical care, Adult                                         | 2 studies (N=331,638)<br>- Cohort<br>1 study(43) (N=2,177)<br><br>- Cross-sectional<br>1 study (13)<br>(N=329,461)         | Cross-sectional<br>1 study(13)<br>(N=329,461) |                                 | Cohort<br>1 study(43)<br>(N=2,177)                                                        | For adult patients receiving general medical conditions, patients who receive an initial telehealth visit may have higher rates of missed visits compared with those who receive in-person care.                                                      | High<br>Direct<br>Precise<br>Inconsistent<br>Undetected<br>Overall: Low          |
| General medical care, Child                                         | No Studies                                                                                                                 |                                               |                                 |                                                                                           |                                                                                                                                                                                                                                                       |                                                                                  |
| General medical care, All ages                                      | 1 study (N=278,171)<br>- Cohort<br>1 study(2)<br>(N=278,171)                                                               |                                               |                                 | Cohort<br>1 study(2)<br>(N=278,171)                                                       | For patients of all ages receiving general medical conditions, patients who receive an initial telehealth visit may have lower rates of missed visits compared with those who receive in-person care.                                                 | High<br>Direct<br>Precise<br>Unknown consistency<br>Undetected<br>Overall: Low   |
| Care for specific conditions, COVID-19                              | No Studies                                                                                                                 |                                               |                                 |                                                                                           |                                                                                                                                                                                                                                                       |                                                                                  |
| Care for specific conditions, Pregnancy/prenatal/gynecological care | 3 studies (N=4,243)<br>- Cohort<br>3 studies(1, 5, 14)<br>(N=4,243)                                                        |                                               |                                 | Cohort<br>3 studies(1, 5, 14)<br>(N=4,243)                                                | For women who receive specialized pregnancy/prenatal/gynecological care, those who receive an initial telehealth visit may have lower missed visit rates compared with those who receive in-person care.                                              | High<br>Direct<br>Precise<br>Consistent<br>Undetected<br>Overall: Low            |
| Care for specific conditions, Other conditions                      | 6 studies (N=34,280)<br>- Cohort<br>5 studies(34, 65, 66, 72, 76)<br>(N=33,702)<br>- Cross-sectional<br>1 study(9) (N=578) | Cohort<br>2 studies(34, 72)<br>(N=2,694)      |                                 | Cohort<br>3 studies(65, 66, 76)<br>(N=31,008)<br>Cross-sectional<br>1 study(9)<br>(N=578) | For patients who receive care for specific conditions (excluding COVID-19 and pregnancy/prenatal/gynecological care), those who receive an initial telehealth visit may have lower missed visit rates compared with those who receive in-person care. | High<br>Direct<br>Precise<br>Consistent<br>Undetected<br>Overall: Low            |

| Clinical area                                                       | Number of Studies and Sample Size (N)                                                                                 | The Direction of Findings (Sample Size)                                     |                                 |                                               | Conclusion                                                                                                                                                                                                                                                                                                                                                                                                 | Strength of Evidence                                                                    |
|---------------------------------------------------------------------|-----------------------------------------------------------------------------------------------------------------------|-----------------------------------------------------------------------------|---------------------------------|-----------------------------------------------|------------------------------------------------------------------------------------------------------------------------------------------------------------------------------------------------------------------------------------------------------------------------------------------------------------------------------------------------------------------------------------------------------------|-----------------------------------------------------------------------------------------|
|                                                                     |                                                                                                                       | Favors In-person                                                            | No Difference/Unclear           | Favors Telehealth                             |                                                                                                                                                                                                                                                                                                                                                                                                            |                                                                                         |
| General behavioral/Mental health                                    | 2 studies (N=350)<br>- Cohort<br>2 studies(57, 74) (N=350)                                                            | Cohort<br>2 studies(57, 74) (N=350)                                         |                                 |                                               | For patients receiving care for general behavioral and mental health conditions, those who receive an initial telehealth visit may have higher rates of missed visits compared with those who receive in-person care.                                                                                                                                                                                      | High<br>Direct<br>Imprecise<br>Consistent<br>Undetected<br>Overall: Low                 |
| <b>Case Resolution/ Duplication of Services (N=14 Studies)</b>      |                                                                                                                       |                                                                             |                                 |                                               |                                                                                                                                                                                                                                                                                                                                                                                                            |                                                                                         |
| General medical care, Adult                                         | No studies                                                                                                            |                                                                             |                                 |                                               |                                                                                                                                                                                                                                                                                                                                                                                                            |                                                                                         |
| General medical care, Child                                         | 1 study (N=1,769)<br>- Cohort<br>1 study(30) (N=1,769)                                                                |                                                                             | Cohort<br>1 study(30) (N=1,769) |                                               | For children who receive care for general medical conditions, those who receive an initial telehealth visit have the same rates of case resolution compared with those who receive in-person care.                                                                                                                                                                                                         | High<br>Direct<br>Imprecise<br>Unknown Consistency<br>Undetected<br>Overall: Low        |
| General medical care, All ages                                      | 2 studies (N=607,769)<br>- Cohort<br>1 study(28) (N=607,573)<br>- Cross-sectional<br>1 study(68)(N=196)               | Cohort<br>1 study(28) (N=607,573)<br>Cross-sectional<br>1 study(68) (N=196) |                                 | Cohort<br>1 study(28) (N=505,224)             | For patients of all ages who receive care for general medical conditions, those who receive an initial telehealth visit for an acute condition may have higher rates of follow-up visits compared with those who receive in-person care and those who receive an initial telehealth visit for a chronic condition may have lower rates of follow-up visits compared with those who receive in-person care. | High<br>Direct<br>Precise<br>Inconsistent<br>Undetected<br>Overall: Moderate            |
| Care for specific conditions, COVID-19                              | 1 study (N=285)<br>- Cohort<br>1 study(11) (N=285)                                                                    |                                                                             |                                 | Cohort<br>1 study(11) (N=285)                 |                                                                                                                                                                                                                                                                                                                                                                                                            | High<br>Direct<br>Precise<br>Unknown Consistency<br>Undetected<br>Overall: Insufficient |
| Care for specific conditions, Pregnancy/prenatal/gynecological care | 1 study (N=218)<br>- Cohort<br>1 study(32) (N=218)                                                                    |                                                                             |                                 | Cohort<br>1 study(32) (N=218)                 |                                                                                                                                                                                                                                                                                                                                                                                                            | High<br>Direct<br>Precise<br>Unknown Consistency<br>Undetected<br>Overall: Insufficient |
| Care for specific conditions, Other conditions                      | 9 studies (N=8,313)<br>- Cohort<br>8 studies(21, 35, 38, 39, 46, 49, 59, 76) (N=8,265)<br>- RCT<br>1 study(48) (N=48) | Cohort<br>4 studies(39, 46, 59, 76) (N=6,098)<br>RCT<br>1 study(48) (N=48)  |                                 | Cohort<br>4 studies(21, 35, 38, 49) (N=2,167) | For patients who receive care for specific conditions (excluding COVID-19 and pregnancy/prenatal/gynecological care), those who receive an initial telehealth visit may have higher rates of case resolution and a lower rate of duplicated services                                                                                                                                                       | High<br>Direct<br>Precise<br>Inconsistent<br>Undetected<br>Overall: Low                 |



| Clinical area                                                       | Number of Studies and Sample Size (N)                                                                                        | The Direction of Findings (Sample Size)                                   |                                  |                                                                      | Conclusion*                                                                                                                                                                                                                                                              | Strength of Evidence                                                       |
|---------------------------------------------------------------------|------------------------------------------------------------------------------------------------------------------------------|---------------------------------------------------------------------------|----------------------------------|----------------------------------------------------------------------|--------------------------------------------------------------------------------------------------------------------------------------------------------------------------------------------------------------------------------------------------------------------------|----------------------------------------------------------------------------|
|                                                                     |                                                                                                                              | Favors In-person                                                          | No Difference/Unclear            | Favors Telehealth                                                    |                                                                                                                                                                                                                                                                          |                                                                            |
|                                                                     |                                                                                                                              |                                                                           |                                  |                                                                      | compared with those who receive in-person care.                                                                                                                                                                                                                          |                                                                            |
| General behavioral/Mental health                                    | No studies                                                                                                                   |                                                                           |                                  |                                                                      |                                                                                                                                                                                                                                                                          |                                                                            |
| <b>Change in Therapy/ Medication (N=11 Studies)</b>                 |                                                                                                                              |                                                                           |                                  |                                                                      |                                                                                                                                                                                                                                                                          |                                                                            |
| General medical care, Adult                                         | 2 studies (N=13,608,708)<br>- Cohort<br>2 studies(45, 70)<br>(N=13,608,708)                                                  | Cohort<br>2 studies(45, 70)<br>(N=13,608,708)                             |                                  |                                                                      | For adult patients receiving general medical conditions, patients who receive an initial in-person visit may have higher rates of change in therapy/medication compared with those who receive telehealth.                                                               | High<br>Direct<br>Precise<br>Consistent<br>Undetected<br>Overall: Moderate |
| General medical care, Child                                         | No studies                                                                                                                   |                                                                           |                                  |                                                                      |                                                                                                                                                                                                                                                                          |                                                                            |
| General medical care, All ages                                      | No studies                                                                                                                   |                                                                           |                                  |                                                                      |                                                                                                                                                                                                                                                                          |                                                                            |
| Care for specific conditions, COVID-19                              | No studies                                                                                                                   |                                                                           |                                  |                                                                      |                                                                                                                                                                                                                                                                          |                                                                            |
| Care for specific conditions, Pregnancy/prenatal/gynecological care | No studies                                                                                                                   |                                                                           |                                  |                                                                      |                                                                                                                                                                                                                                                                          |                                                                            |
| Care for specific conditions, Other conditions                      | 9 studies (N=8,104)<br>- Cohort<br>8 studies(15, 39, 42, 49, 53, 61, 64, 76)<br>(N=8,056)<br><br>- RCT<br>1 study(48) (N=48) | Cohort<br>3 studies(15, 42, 76)(N=4,254)<br><br>RCT<br>1 study(48) (N=48) |                                  | Cohort<br>5 studies(39, 49, 53, 61, 64)<br>(N=3,802)                 | For patients who receive care for specific conditions (excluding COVID-19 and pregnancy/prenatal/gynecological care), those who receive an initial telehealth visit may have lower rates of change in therapy/medication compared with those who receive in-person care. | High<br>Direct<br>Precise<br>Consistent<br>Undetected<br>Overall: Low      |
| General behavioral/Mental health                                    | No studies                                                                                                                   |                                                                           |                                  |                                                                      |                                                                                                                                                                                                                                                                          |                                                                            |
| <b>Treatment/ Medication Adherence (N=13 Studies)</b>               |                                                                                                                              |                                                                           |                                  |                                                                      |                                                                                                                                                                                                                                                                          |                                                                            |
| General medical care, Adult                                         | 3 studies (N=960)<br>- Cohort<br>2 studies(45, 77)<br>(N=906)<br>- RCT<br>1 study(27)<br>(N=54)                              |                                                                           | Cohort<br>1 study(45)<br>(N=492) | Cohort<br>1 study(77)<br>(N=414)<br><br>RCT<br>1 study(27)<br>(N=54) | For patients of all ages who receive care for general medical conditions, those who receive an initial telehealth visit may have higher rates of therapy/medication adherence compared with those who receive in-person care.                                            | High<br>Direct<br>Precise<br>Consistent<br>Undetected<br>Overall: Low      |
| General medical care, Child                                         | No studies                                                                                                                   |                                                                           |                                  |                                                                      |                                                                                                                                                                                                                                                                          |                                                                            |
| General medical care, All ages                                      | No studies                                                                                                                   |                                                                           |                                  |                                                                      |                                                                                                                                                                                                                                                                          |                                                                            |
| Care for specific conditions, COVID-19                              | No studies                                                                                                                   |                                                                           |                                  |                                                                      |                                                                                                                                                                                                                                                                          |                                                                            |
| Care for specific conditions, Pregnancy/prenatal/gynecological care | No studies                                                                                                                   |                                                                           |                                  |                                                                      |                                                                                                                                                                                                                                                                          |                                                                            |



| Clinical area                                                          | Number of Studies and Sample Size (N)                                                                                                            | The Direction of Findings (Sample Size)                |                                        |                                                                                                        | Conclusion*                                                                                                                                                                                                                                                              | Strength of Evidence                                                               |
|------------------------------------------------------------------------|--------------------------------------------------------------------------------------------------------------------------------------------------|--------------------------------------------------------|----------------------------------------|--------------------------------------------------------------------------------------------------------|--------------------------------------------------------------------------------------------------------------------------------------------------------------------------------------------------------------------------------------------------------------------------|------------------------------------------------------------------------------------|
|                                                                        |                                                                                                                                                  | Favors In-person                                       | No Difference/Unclear                  | Favors Telehealth                                                                                      |                                                                                                                                                                                                                                                                          |                                                                                    |
| Care for specific conditions, Other conditions                         | 5 studies (N=144,426)<br>- Cohort<br>3 studies(7, 17, 26) (N=144,202)<br>- Cross-sectional<br>1 study(44) (N=176)<br>- RCT<br>1 study(48) (N=48) | Cohort<br>1 study(7) (N= 127,444)                      | Cohort<br>1 study(26) (N=270)          | Cohort<br>1 study(17) (N=3,744)<br>Cross-sectional<br>1 study(44) (N=176)<br>RCT<br>1 study(48) (N=48) | For patients who receive care for specific conditions (excluding COVID-19 and pregnancy/prenatal/gynecological care), those who receive an initial telehealth visit may have lower rates of therapy/medication adherence compared with those who receive in-person care. | High<br>Direct<br>Precise<br>Consistent<br>Undetected<br>Overall: Low              |
| General behavioral/Mental health                                       | 5 studies (N=6,494)<br>- Cohort<br>4 studies(16, 20, 24, 58) (N=2,156)<br>- Cross-sectional<br>1 study(22) (N=4,338)                             |                                                        |                                        | Cohort<br>4 studies(16, 20, 24, 58) (N=2,156)<br>Cross-sectional<br>1 study(22) (N=4,338)              | For patients receiving care for general behavioral and mental health conditions, those who receive an initial telehealth visit may have higher rates of therapy/medication adherence compared with those who receive in-person care.                                     | High<br>Direct<br>Precise<br>Consistent<br>Undetected<br>Overall: Low              |
| <b>Up-to-Date Laboratory and Paraclinical Assessment (N=9 Studies)</b> |                                                                                                                                                  |                                                        |                                        |                                                                                                        |                                                                                                                                                                                                                                                                          |                                                                                    |
| General medical care, Adult                                            | No studies                                                                                                                                       |                                                        |                                        |                                                                                                        |                                                                                                                                                                                                                                                                          |                                                                                    |
| General medical care, Child                                            | 1 study (N=1,769)<br>- Cohort<br>1 study(30) (N=1,769)                                                                                           | 1 study (N=1,769)<br>- Cohort<br>1 study(30) (N=1,769) |                                        |                                                                                                        | For children who receive care for general medical conditions, those who receive an initial telehealth visit have lower rates of up-to-date labs and paraclinical assessment compared with those who receive in-person care.                                              | High<br>Direct<br>Precise<br>Unknown Consistency<br>Undetected<br>Overall: Low     |
| General medical care, All ages                                         | No studies                                                                                                                                       |                                                        |                                        |                                                                                                        |                                                                                                                                                                                                                                                                          |                                                                                    |
| Care for specific conditions, COVID-19                                 | No studies                                                                                                                                       |                                                        |                                        |                                                                                                        |                                                                                                                                                                                                                                                                          |                                                                                    |
| Care for specific conditions, Pregnancy/prenatal/gynecological care    | 1 study (N=104)<br>- Cohort<br>1 study(5) (N=104)                                                                                                | Cohort<br>1 study(5) (N=104)                           |                                        |                                                                                                        | For women receiving care for specialized care for pregnancy/prenatal/ gynecological care, those who receive an initial telehealth visit may have similar rates of up-to-date labs and paraclinical assessment compared with those who receive in-person care.            | Medium<br>Direct<br>Imprecise<br>Unknown Consistency<br>Undetected<br>Overall: Low |
| Care for specific conditions, Other conditions                         | 7 studies (N=14,378)<br>- Cohort<br>6 studies (15, 39, 41, 51, 56, 67) (N=13,468)<br>- Cross-sectional<br>1 study(50) (N=910)                    | Cohort<br>5 studies (15, 39, 41, 56, 67) (N=13,259)    | Cross-sectional<br>1 study(50) (N=910) | Cohort<br>1 study(51); (N=209)                                                                         | For patients receiving care for specific conditions (excluding COVID-19 and pregnancy/prenatal/ gynecological care), those who receive an initial telehealth visit may have lower rates of up-to-date labs and paraclinical assessment                                   | High<br>Direct<br>Precise<br>Inconsistent<br>Undetected<br>Overall: Low            |

| Clinical area                    | Number of Studies and Sample Size (N) | The Direction of Findings (Sample Size) |                       |                   | Conclusion*                                     | Strength of Evidence |
|----------------------------------|---------------------------------------|-----------------------------------------|-----------------------|-------------------|-------------------------------------------------|----------------------|
|                                  |                                       | Favors In-person                        | No Difference/Unclear | Favors Telehealth |                                                 |                      |
|                                  |                                       |                                         |                       |                   | compared with those who receive in-person care. |                      |
| General behavioral/Mental health | No studies                            |                                         |                       |                   |                                                 |                      |

ED=emergency department; NA=not applicable/no studies; SOE =strength of evidence

\*The strength of evidence domains included in the assessment (as listed in descending order) were study limitations (reported as low, medium, high), directness (whether the evidence links the interventions directly to health outcomes), precision (the degree of certainty surrounding an effect estimate concerning a given outcome), consistency (the degree to which reported effect sizes appear to have the same direction of effect), and reporting bias (indicates selective publication of results, which results in the misrepresentation of the true effect). After the assessment of each domain, the strength of evidence received a single grade of high, moderate, low, or insufficient.

# Supplementary Figure 1. Health Outcomes for Patients with an Initial Telehealth versus In-person Visit by Outcome Category and Clinical Area.\*

## A. Healthcare Utilization

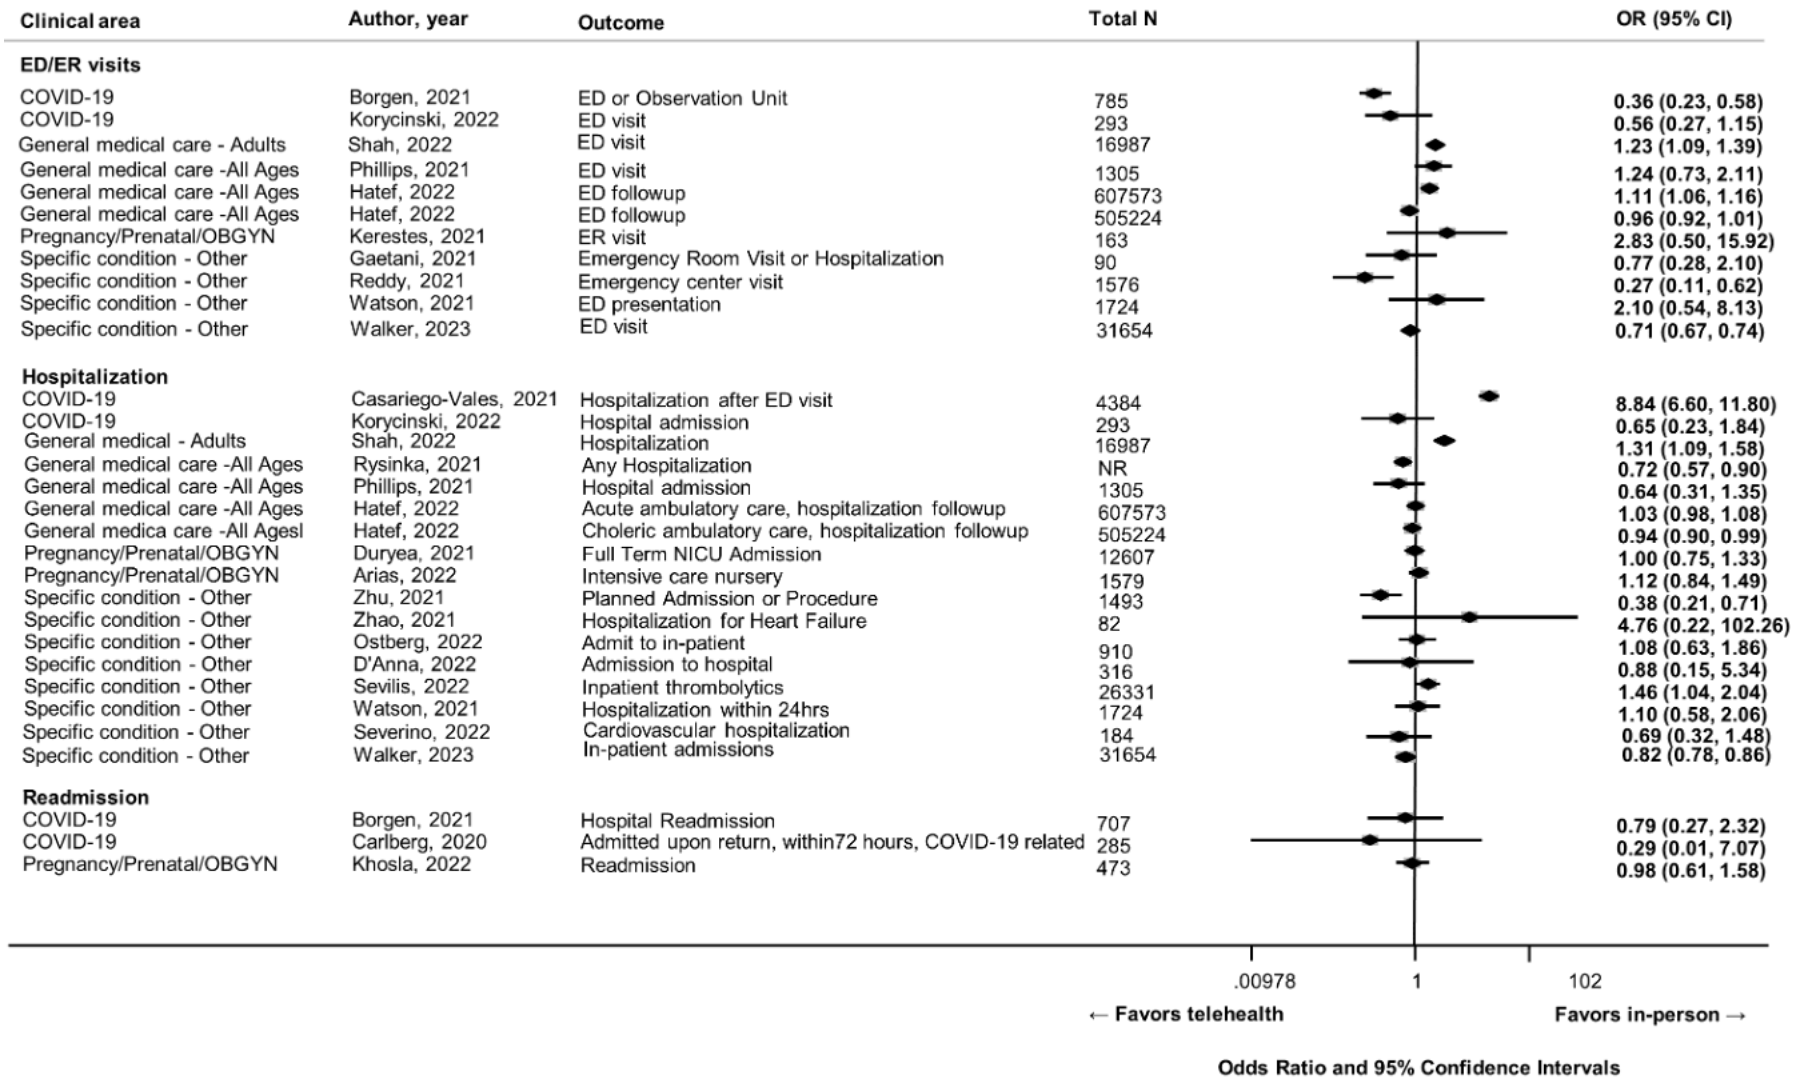

## B. Clinical Outcomes

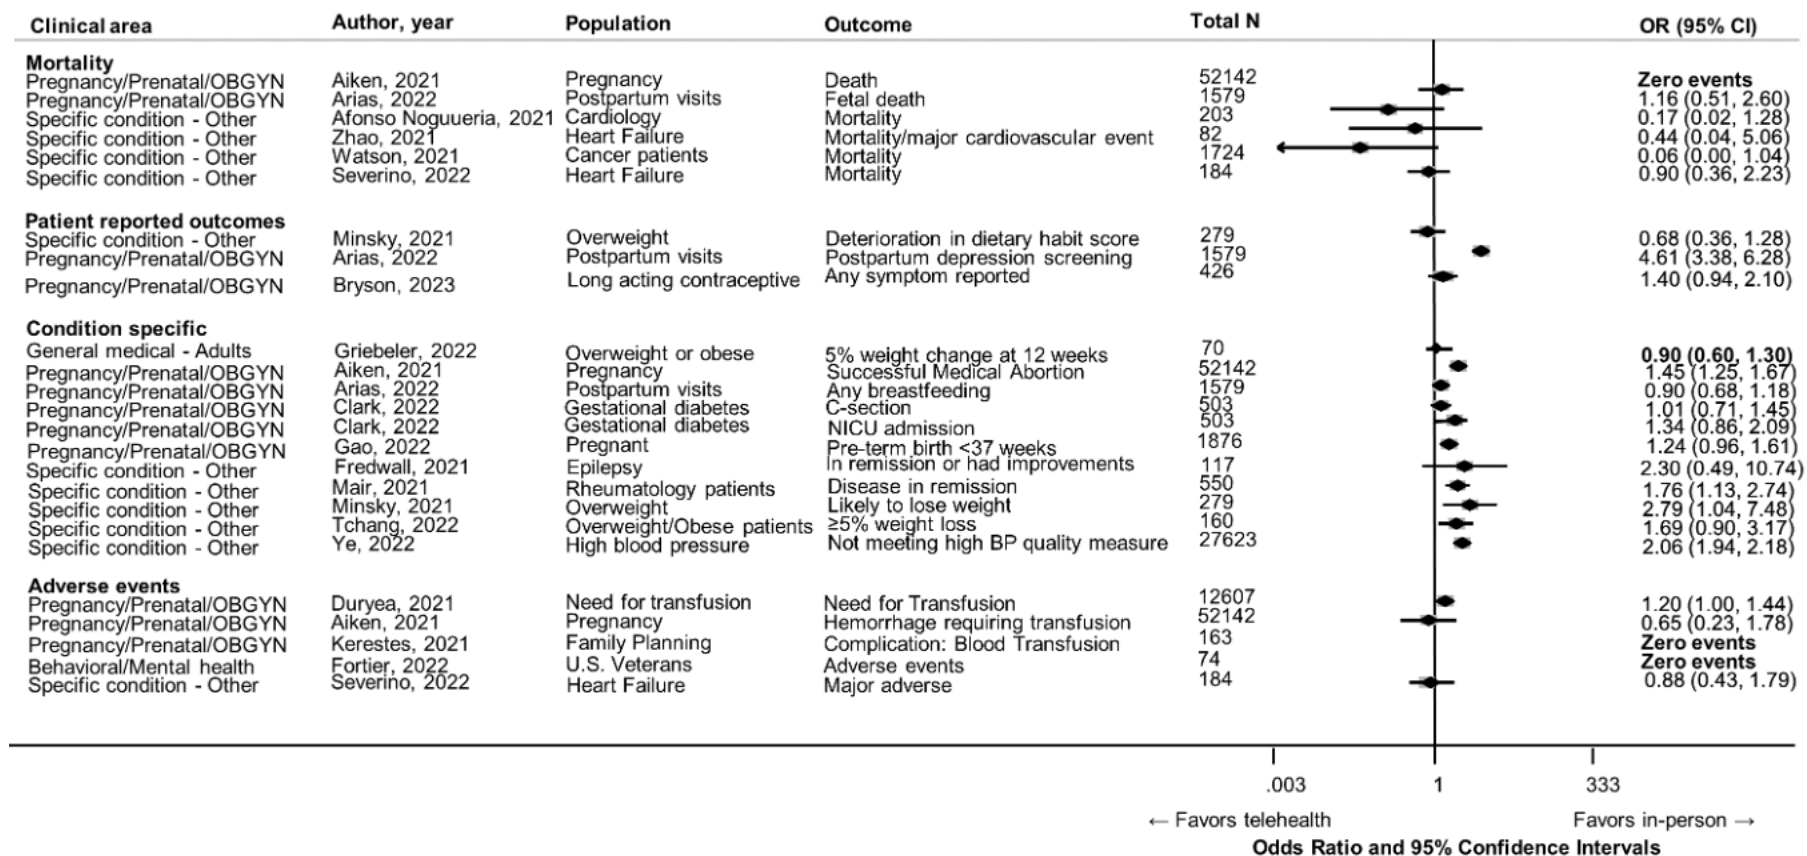

### C. Process Outcomes

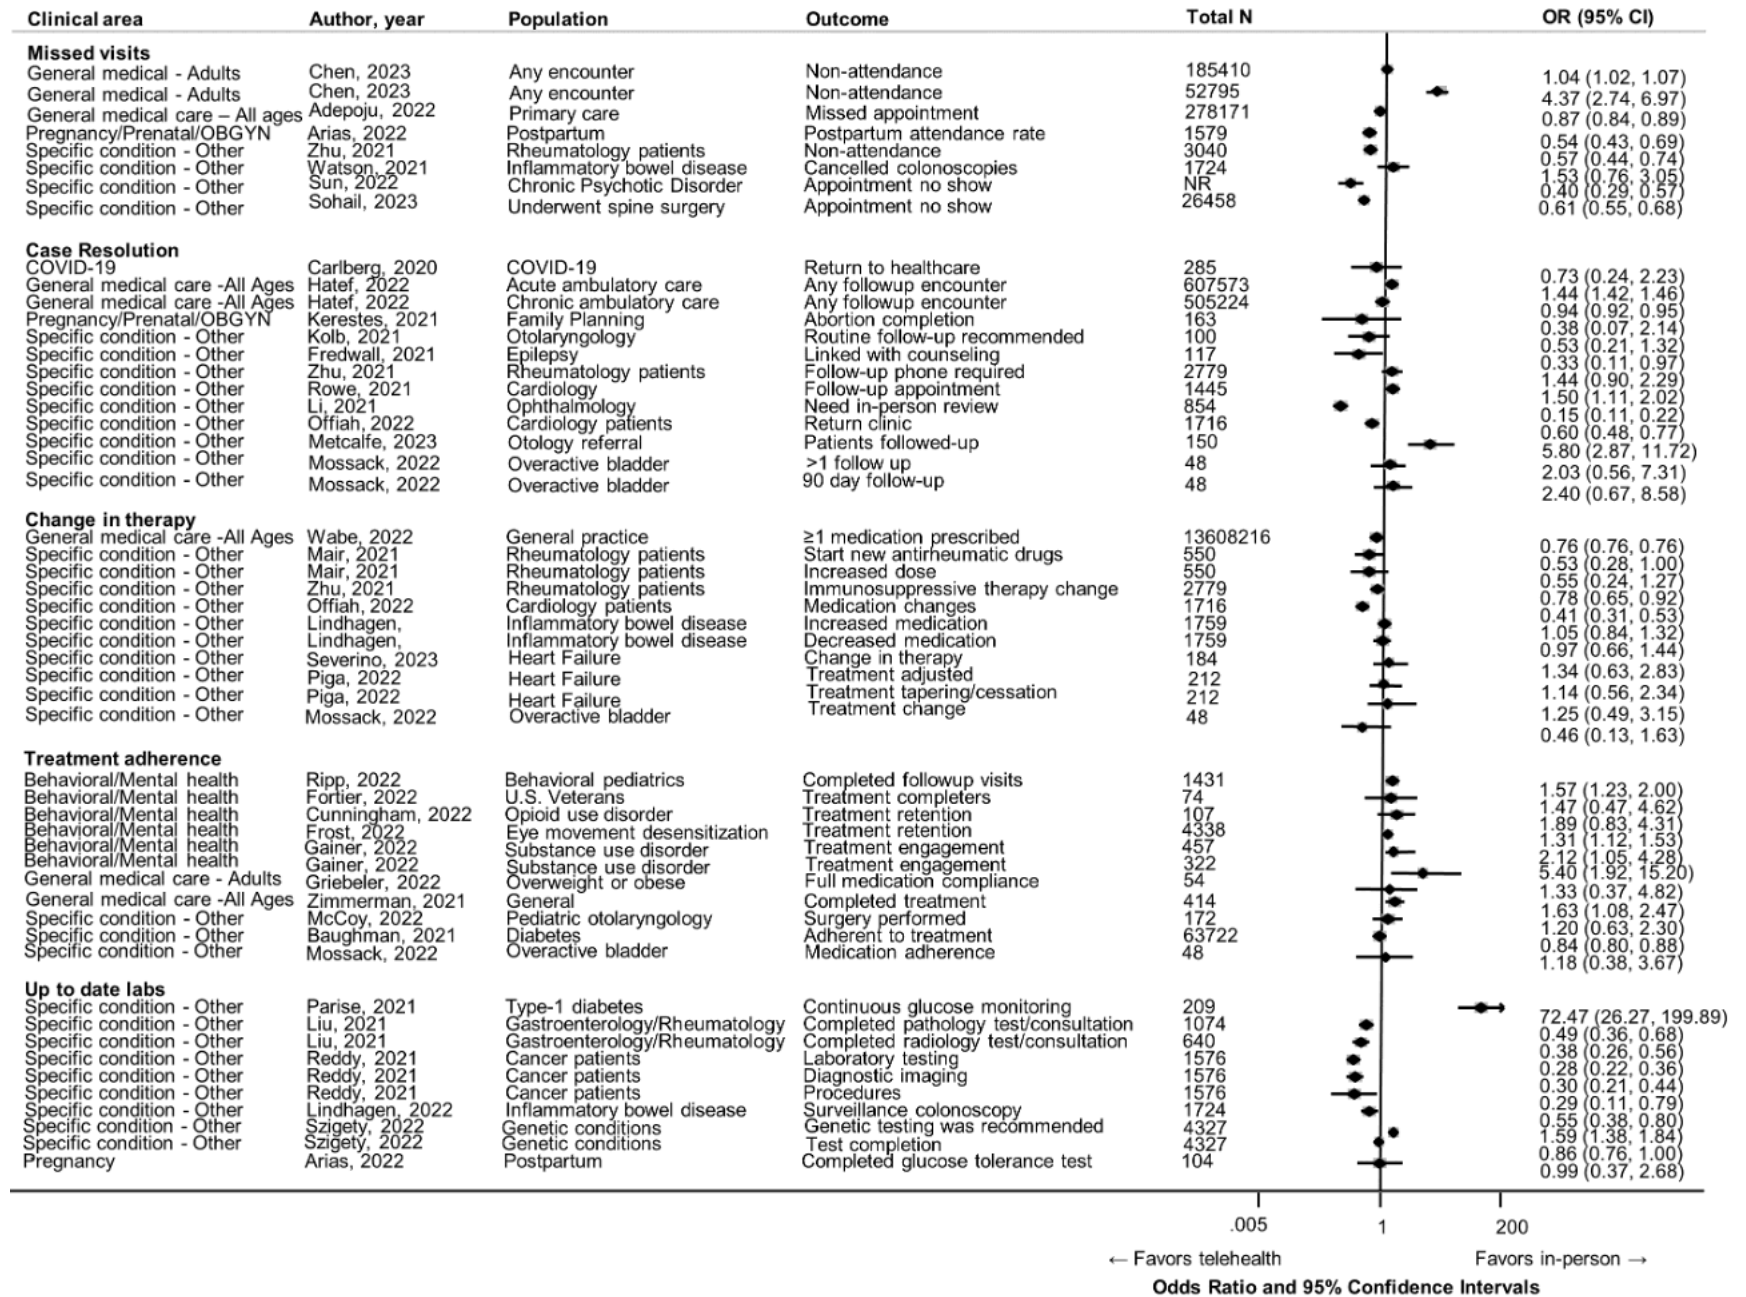

CI=confidence interval; ED/ER=emergency department/emergency room; HHT=hereditary hemorrhagic telangiectasia; N=sample size; NICU=neonatal intensive care unit; NR=not reported; OBGYN=obstetrics and gynecology; OR=odds ratio

\* Included studies in each graph reported categorical data from which an odds ratio was calculated. Other studies did not report categorical data and odds ratios could not be calculated.

## Supplementary References

1. Adams AM, Wu H, Zhang FR, Wajsberg JR, Bruney TL. Postpartum Care in the Time of COVID-19: The Use of Telemedicine for Postpartum Care. *Telemed J E Health*. 2023;29(2):235-41.
2. Adepoju OE, Chae M, Liaw W, Angelocci T, Millard P, Matuk-Villazon O. Transition to telemedicine and its impact on missed appointments in community-based clinics. *Ann Med*. 2022;54(1):98-107.
3. Afonso Nogueira M, Ferreira F, Raposo AF, Mónica L, Simões Dias S, Vasconcellos R, et al. Impact of telemedicine on the management of heart failure patients during coronavirus disease 2019 pandemic. *ESC Heart Fail*. 2021;8(2):1150-5.
4. Aiken A, Lohr PA, Lord J, Ghosh N, Starling J. Effectiveness, safety and acceptability of no-test medical abortion (termination of pregnancy) provided via telemedicine: a national cohort study. *Bjog*. 2021;128(9):1464-74.
5. Arias MP, Wang E, Leitner K, Sannah T, Keegan M, Delferro J, et al. The impact on postpartum care by telehealth: a retrospective cohort study. *Am J Obstet Gynecol MFM*. 2022;4(3):100611.
6. Barequet D, Gutfreund S, Goldstein M, Loewenstein A, Gamzu R, Varssano D. Evaluation of a Telemedicine Model for Following Keratoconus Patients in the Era of COVID-19 Pandemic. *Telemed J E Health*. 2021.
7. Baughman D, Zain A, Waheed A. Patient Adherence to Hemoglobin A1c Testing Recommendations in Telemedicine and In-Office Cohorts During COVID-19. *JAMA Netw Open*. 2021;4(9):e2127779.
8. Borgen I, Romney MC, Redwood N, Delgado B, Alea P, George BH, et al. From Hospital to Home: An Intensive Transitional Care Management Intervention for Patients with COVID-19. *Popul Health Manag*. 2021;24(1):27-34.
9. Boshara AI, Patton ME, Hunt BR, Glick N, Johnson AK. Supporting Retention in HIV Care: Comparing In-Person and Telehealth Visits in a Chicago-Based Infectious Disease Clinic. *AIDS Behav*. 2022:1-7.
10. Bryson AE, Milliren CE, Borzutzky C, Golub SA, Pitts SAB, DiVasta AD. Telemedicine for Adolescent and Young Adult Long-Acting Reversible Contraception Follow-Up Care amidst a Global Pandemic. *J Pediatr Adolesc Gynecol*. 2023;36(1):51-7.
11. Carlberg DJ, Bhat R, Patterson WO, Zaatari S, Chandra V, Kolkin A, et al. Preliminary Assessment of a Telehealth Approach to Evaluating, Treating, and Discharging Low-Acuity Patients With Suspected COVID-19. *J Emerg Med*. 2020;59(6):957-63.
12. Casariego-Vales E, Blanco-López R, Rosón-Calvo B, Suárez-Gil R, Santos-Guerra F, Dobao-Feijoo MJ, et al. Efficacy of Telemedicine and Telemonitoring in At-Home Monitoring of Patients with COVID-19. *J Clin Med*. 2021;10(13).
13. Chen K, Zhang C, Gurley A, Akkem S, Jackson H. Appointment Non-attendance for Telehealth Versus In-Person Primary Care Visits at a Large Public Healthcare System. *J Gen Intern Med*. 2023;38(4):922-8.
14. Clark A, Jung E, Prusky C, Shah BR, Halperin IJ. An Evaluation of Virtual Care for Gestational Diabetes Using the Quadruple Aim Framework: Assessment of Patient and Provider Experience, Cost and Clinical Outcomes. *Can J Diabetes*. 2022.
15. Cobo-Calvo A, Zabalza A, Río J, Arrambide G, Otero-Romero S, Tagliani P, et al. Impact of COVID-19 pandemic on frequency of clinical visits, performance of MRI studies, and therapeutic choices in a multiple sclerosis referral centre. *J Neurol*. 2022;269(4):1764-72.
16. Cunningham CO, Khalid L, Deng Y, Torres-Lockhart K, Masyukova M, Thomas S, et al. A comparison of office-based buprenorphine treatment outcomes in Bronx community clinics before versus during the COVID-19 pandemic. *J Subst Abuse Treat*. 2022;135:108641.
17. Cvietusa PJ, Goodrich GK, Steiner JF, Shoup JA, King DK, Ritzwoller DP, et al. Transition to virtual asthma care during the COVID pandemic: An observational study. *J Allergy Clin Immunol Pract*. 2022.
18. D'Anna L, Ellis N, Bentley P, Brown Z, Halse O, Jamil S, et al. Delivering telemedicine consultations for patients with transient ischaemic attack during the COVID-19 pandemic in a comprehensive tertiary stroke centre in the United Kingdom. *Eur J Neurol*. 2021;28(10):3456-60.
19. Duryea EL, Adhikari EH, Ambia A, Spong C, McIntire D, Nelson DB. Comparison Between In-Person and Audio-Only Virtual Prenatal Visits and Perinatal Outcomes. *JAMA Netw Open*. 2021;4(4):e215854.

20. Fortier CB, Currao A, Kenna A, Kim S, Beck BM, Katz D, et al. Online Telehealth Delivery of Group Mental Health Treatment Is Safe, Feasible, and Increases Enrollment and Attendance in Post-9/11 U.S. Veterans. *Behav Ther.* 2022;53(3):469-80.
21. Fredwall M, Terry D, Enciso L, Burch MM, Trott K, Albert DVF. Short-term outcomes in pediatric and adolescent patients with psychogenic nonepileptic events seen by telemedicine during the COVID-19 pandemic. *Epilepsy Behav.* 2021;117:107739.
22. Frost MC, Zhang L, Kim HM, Lin LA. Use of and Retention on Video, Telephone, and In-Person Buprenorphine Treatment for Opioid Use Disorder During the COVID-19 Pandemic. *JAMA Netw Open.* 2022;5(10):e2236298.
23. Gaetani E, Agostini F, Di Martino L, Occhipinti D, Passali GC, Santantonio M, et al. Beneficial Effects of Remote Medical Care for Patients with Hereditary Hemorrhagic Telangiectasia during the COVID-19 Pandemic. *J Clin Med.* 2021;10(11).
24. Gainer DM, Wong C, Embree JA, Sardesh N, Amin A, Lester N. Effects of Telehealth on Dropout and Retention in Care among Treatment-Seeking Individuals with Substance Use Disorder: A Retrospective Cohort Study. *Subst Use Misuse.* 2023;58(4):481-90.
25. Gao C, Osmundson S, Malin BA, Chen Y. Telehealth Use in the COVID-19 Pandemic: A Retrospective Study of Prenatal Care. *Stud Health Technol Inform.* 2022;290:503-7.
26. Garmendia O, Monasterio C, Guzmán J, Saura L, Ruiz C, Salord N, et al. Telemedicine Strategy for CPAP Titration and Early Follow-up for Sleep Apnea During COVID-19 and Post-Pandemic Future. *Arch Bronconeumol.* 2021;57 Suppl 2:56-8.
27. Griebeler M, Butsch WS, Rodriguez P, Lomeli L, Kampert M, Makin V, et al. The Use of Telemedicine for Obesity Pharmacotherapy in Patients With Overweight or Obesity. *Obesity (Silver Spring, Md.).* 2022;30:45.
28. Hatef E, Lans D, Bandeian S, Lasser EC, Goldsack J, Weiner JP. Outcomes of In-Person and Telehealth Ambulatory Encounters During COVID-19 Within a Large Commercially Insured Cohort. *JAMA Netw Open.* 2022;5(4):e228954.
29. Hughes Z, Simkowski J, Mendapara P, Fink N, Gupta S, Youmans Q, et al. Racial and Socioeconomic Differences in Heart Failure Hospitalizations and Telemedicine Follow-up During the COVID-19 Pandemic: Retrospective Cohort Study. *JMIR Cardio.* 2022;6(2):e39566.
30. Jazayeri A, Dinh JV, Eseonu D, Hollier JM, Shneider BL. Assessment of telemedicine versus in-person care in managing abdominal pain in children during the COVID-19 pandemic. *Journal of telemedicine and telecare.* 2022:1357633X221125836.
31. Kablinger AS, Gatto AJ, O'Brien VC, Ko H, Jones S, McNamara RS, et al. Effects of COVID-19 on Patients in Adult Ambulatory Psychiatry: Using Patient-Rated Outcome Measures and Telemedicine. *Telemed J E Health.* 2022.
32. Kerestes C, Murayama S, Tyson J, Natavio M, Seamon E, Raidoo S, et al. Provision of medication abortion in Hawai'i during COVID-19: Practical experience with multiple care delivery models. *Contraception.* 2021;104(1):49-53.
33. Khosla K, Suresh S, Mueller A, Perdigao JL, Stewart K, Duncan C, et al. Elimination of racial disparities in postpartum hypertension follow-up after incorporation of telehealth into a quality bundle. *Am J Obstet Gynecol MFM.* 2022;4(3):100580.
34. Klain M, Nappi C, Maurea S, De Risi M, Volpe F, Caiazzo E, et al. Management of differentiated thyroid cancer through nuclear medicine facilities during Covid-19 emergency: the telemedicine challenge. *Eur J Nucl Med Mol Imaging.* 2021;48(3):831-6.
35. Kolb CM, Born K, Banker K, Barth P, Aaronson NL. Comparing telehealth with office-based visits for common pediatric otolaryngology complaints. *Int J Pediatr Otorhinolaryngol.* 2021;145:110712.
36. Korycinski S, Metcalf D, Keteyian C. Effectiveness of a telephone-based nursing intervention to reduce hospital utilization by COVID-19 patients. *Public Health Nurs.* 2022.
37. Levinson CA, Spoor SP, Keshishian AC, Pruitt A. Pilot outcomes from a multidisciplinary telehealth versus in-person intensive outpatient program for eating disorders during versus before the Covid-19 pandemic. *Int J Eat Disord.* 2021;54(9):1672-9.



38. Li JO, Thomas AAP, Kilduff CLS, Logeswaran A, Ramessur R, Jaselsky A, et al. Safety of video-based telemedicine compared to in-person triage in emergency ophthalmology during COVID-19. *EClinicalMedicine*. 2021;34:100818.
39. Lindhagen S, Karling P. A more frequent disease monitoring but no increased disease activity in patients with inflammatory bowel disease during the first year of the SARS-CoV-2 pandemic. A retrospective study. *Scand J Gastroenterol*. 2022;57(2):169-74.
40. Liou H, Lane C, Huang C, Mookadam M, Joseph M, Hecker DuVal J. Eye Movement Desensitization and Reprocessing in a Primary Care Setting: Assessing Utility and Comparing Efficacy of Virtual Versus In-Person Methods. *Telemed J E Health*. 2022;28(9):1359-66.
41. Liu TL, Yeo AL, Ravi A, Patabendige G, Lim TW, Bell S, et al. The impact of COVID-19 telehealth on outpatient test completion. *Intern Med J*. 2021.
42. Mair J, Woolley M, Grainger R. Abrupt change to telephone follow-up clinics in a regional rheumatology service during COVID-19: analysis of treatment decisions. *Intern Med J*. 2021;51(6):960-4.
43. Mathews CP, Convoy S, Heyworth L, Knisely M. Evaluation of the Use of Telehealth Video Visits for Veterans With Chronic Pain. *Pain Manag Nurs*. 2022;23(4):418-23.
44. McCoy JL, Shaffer AD, Dohar JE. Pediatric otolaryngology telemedicine amid a pandemic - And beyond. *Int J Pediatr Otorhinolaryngol*. 2022;153:111014.
45. McNamara A, Zhao M, Lee SY. Evaluating the primary care clinical pharmacist visit transition to telehealth during the COVID-19 pandemic by comparing medication related problems from telehealth visits and in-person visits. *J Am Coll Clin Pharm*. 2021;4(8):914-23.
46. Metcalfe C, Gaskell P, McLelland T, Patel S, Muzaffar J, Dalton L, et al. A retrospective cohort study of telephone versus face-to-face clinics for the management of new otology referrals. *Eur Arch Otorhinolaryngol*. 2023;280(4):1677-82.
47. Minsky NC, Pachter D, Zacay G, Chishlevitz N, Ben-Hamo M, Weiner D, et al. Managing Obesity in Lockdown: Survey of Health Behaviors and Telemedicine. *Nutrients*. 2021;13(4).
48. Mossack S, Inoyatov I, Fonseca P, Du C, Lee E, Ruan H, et al. A Randomized Controlled Trial Comparing Telemedicine Versus In-Person Office Visits for the Follow-Up of Overactive Bladder. *Urogynecology (Phila)*. 2022;28(12):819-24.
49. Offiah G, O'Connor C, Waters M, Hickey N, Loo B, Moore D, et al. The impact of a virtual cardiology outpatient clinic in the COVID-19 era. *Ir J Med Sci*. 2022;191(2):553-8.
50. Ostberg N, Ip W, Brown I, Li R. Impact of telemedicine on clinical practice patterns for patients with chest pain in the emergency department. *Int J Med Inform*. 2022;161:104726.
51. Parise M, Tartaglione L, Cutruzzola A, Maiorino MI, Esposito K, Pitocco D, et al. Teleassistance for Patients With Type 1 Diabetes During the COVID-19 Pandemic: Results of a Pilot Study. *J Med Internet Res*. 2021;23(4):e24552.
52. Phillips JC, Lord RW, Davis SW, Burton AA, Kirk JK. Comparing telehealth to traditional office visits for patient management in the COVID-19 pandemic: A cross-sectional study in a respiratory assessment clinic. *J Telemed Telecare*. 2021:1357633x21990197.
53. Piga M, Floris A, Congia M, Chessa E, Cangemi I, Cauli A. Telemedicine in rheumatology: high specificity and sensitivity of follow-up virtual video consultations during COVID-19 pandemic. *Rheumatology (Oxford)*. 2022;61(5):1795-801.
54. Pinsker JE, Singh H, McElwee Malloy M, Constantin A, Leas S, Kriegel K, et al. A Virtual Training Program for the Tandem t:slim X2 Insulin Pump: Implementation and Outcomes. *Diabetes Technol Ther*. 2021;23(6):467-70.
55. Prato A, Maugeri N, Chiarotti F, Morcaldi L, Vicario CM, Barone R, et al. A Randomized Controlled Trial Comparing Videoconference vs. Face-to-Face Delivery of Behavior Therapy for Youths With Tourette Syndrome in the Time of COVID-19. *Front Psychiatry*. 2022;13:862422.
56. Reddy A, Arthur J, Dalal S, Hui D, Subbiah I, Wu J, et al. Rapid Transition to Virtual Care during the COVID-19 Epidemic: Experience of a Supportive Care Clinic at a Tertiary Care Cancer Center. *J Palliat Med*. 2021;24(10):1467-73.
57. Rene R, Cherson M, Rannazzisi A, Felter J, Silverio A, Cunningham AT. Transitioning from In-Person to Telemedicine Within Primary Care Behavioral Health During COVID-19. *Popul Health Manag*. 2022;25(4):455-61.

58. Ripp A, Steinway C, Katzow MW, Jan S, Chen J, Chen V. Telehealth Utilization and Follow-Up Visits in Developmental-Behavioral Pediatrics During the COVID-19 Pandemic in 2020. *J Dev Behav Pediatr.* 2022.
59. Rowe BSJ, Paratz ED, Fahy L, Prior DL, Maclsaac AI. Telehealth in Australian cardiology: Insight into factors predicting the use of telephone versus video during the COVID-19 pandemic. *Intern Med J.* 2021.
60. Ryskina KL, Shultz K, Zhou Y, Lautenbach G, Brown RT. Older adults' access to primary care: Gender, racial, and ethnic disparities in telemedicine. *J Am Geriatr Soc.* 2021.
61. Severino P, D'Amato A, Prosperi S, Magnocavallo M, Maraone A, Notari C, et al. Clinical Support through Telemedicine in Heart Failure Outpatients during the COVID-19 Pandemic Period: Results of a 12-Months Follow Up. *J Clin Med.* 2022;11(10).
62. Sevilis T, McDonald M, Avila A, Heath G, Gao L, O'Brien G, et al. Telestroke: Maintaining Quality Acute Stroke Care During the COVID-19 Pandemic. *Telemed J E Health.* 2022;28(4):481-5.
63. Shah VV, Villaflores CW, Chuong LH, Leuchter RK, Kilaru AS, Vangala S, et al. Association Between In-Person vs Telehealth Follow-up and Rates of Repeated Hospital Visits Among Patients Seen in the Emergency Department. *JAMA Netw Open.* 2022;5(10):e2237783.
64. Sharma E, Meade S, D'Errico F, Pavlidis P, Lubner R, Zeki S, et al. The effects of COVID-19 on IBD prescribing and service provision in a UK tertiary centre. *GastroHep.* 2020;2(6):318-26.
65. Sohail M, Long D, Kay E, Levitan EB, Batey DS, Reed-Pickens H, et al. Role of Visit Modality in the HIV-Related No-Shows During the COVID-19 Pandemic: A Multisite Retrospective Cohort Study. *AIDS Behav.* 2023:1-10.
66. Sun CA, Perrin N, Maruthur N, Renda S, Levin S, Han HR. Predictors of Follow-Up Appointment No-Shows Before and During COVID Among Adults with Type 2 Diabetes. *Telemed J E Health.* 2022.
67. Szigety KM, Crowley TB, Gaiser KB, Chen EY, Priestley JRC, Williams LS, et al. Clinical Effectiveness of Telemedicine-Based Pediatric Genetics Care. *Pediatrics.* 2022;150(1).
68. Tarn DM, Hintz C, Mendez-Hernandez E, Sawlani SP, Bholat MA. Using Virtual Visits to Care for Primary Care Patients With COVID-19 Symptoms. *J Am Board Fam Med.* 2021;34(Suppl):S147-s51.
69. Tchang BG, Morrison C, Kim JT, Ahmed F, Chan KM, Alonso LC, et al. Weight Loss Outcomes With Telemedicine During COVID-19. *Front Endocrinol (Lausanne).* 2022;13:793290.
70. Wabe N, Thomas J, Sezgin G, Sheikh MK, Gault E, Georgiou A. Medication prescribing in face-to-face versus telehealth consultations during the COVID-19 pandemic in Australian general practice: a retrospective observational study. *BJGP Open.* 2022;6(1).
71. Walker B, Stoecker C, Shao Y, Nauman E, Fort D, Shi L. Telehealth and Medicare Type 2 Diabetes Care Outcomes: Evidence From Louisiana. *Med Care.* 2023;61(Suppl 1):S77-s82.
72. Watson N, Cox A, Sanmugarajah J, Dzienis M, Hughes I. Safety and efficacy of telephone clinics during the COVID-19 pandemic in the provision of care for patients with cancer. *Intern Med J.* 2021;51(9):1414-9.
73. Ye S, Anstey DE, Grauer A, Metser G, Moise N, Schwartz J, et al. The Impact of Telemedicine Visits on the Controlling High Blood Pressure Quality Measure During the COVID-19 Pandemic: Retrospective Cohort Study. *JMIR Form Res.* 2022;6(3):e32403.
74. Zayde A, Kilbride A, Kucer A, Willis HA, Nikitiades A, Alpert J, et al. Connection During COVID-19: Pilot Study of a Telehealth Group Parenting Intervention. *Am J Psychother.* 2021:appipsychotherapy20210005.
75. Zhao M, Qin D, Cataldo G, Sharma K, Dandwate N, Orencole MP, et al. Virtual multidisciplinary care for heart failure patients with cardiac resynchronization therapy devices during the Coronavirus Disease 2019 pandemic. *Int J Cardiol Heart Vasc.* 2021;34:100811.
76. Zhu W, De Silva T, Eades L, Morton S, Ayoub S, Morand E, et al. The impact of telerheumatology and COVID-19 on outcomes in a tertiary rheumatology service: a retrospective audit. *Rheumatology (Oxford).* 2021;60(7):3478-80.
77. Zimmerman M, Terrill D, D'Avanzato C, Tirpak JW. Telehealth Treatment of Patients in an Intensive Acute Care Psychiatric Setting During the COVID-19 Pandemic: Comparative Safety and Effectiveness to In-Person Treatment. *J Clin Psychiatry.* 2021;82(2).
